# Supplementary material for: Genetic features and genomic targets of human KRAB-zinc finger proteins
Source: Genome Res. 2023 Aug;33(8):1409–23. doi: 10.1101/gr.277722.123 (PMC10547255; doi:10.1101/gr.277722.123)
Supplement: Supplement 1 [file Supplemental_Table_S1.xlsx]

## Sheet: Explanations
Table S1: Census of human KZFPs
Locations and annotations of all human KRAB and Zinc-Finger domain pairs as described in the Methods.
Column	Explanation
chr	Chromosome
start	5' end of the identified KRAB domain
end	3' end of the last zinc finger domain in the zinc finger array
assigned_gene	Gene name assigned to the KRAB-zinc-finger domain pair
strand	Strand of the gene
classification	Classification of the assigned gene according to ensembl
age_MA	Age of the assigned gene in million years
species	Species the KZFP was first found (corresponds to age)
z_C2H2_miss	Normalized number of missens mutations in the C2H2 domains of the zinc fingers of the assigned gene. Values are standardized z-scores across all KZFPs with positive values indicating more polymorphic KZFPs and negative values more conserved KZFPs than the average
cluster	The KZFP cluster of the assigned gene

## Sheet: human KZFPs
chr	start	end	assigned_gene	strand	classification	age_MA	species	z_C2H2_miss	cluster
chr5	163282299	163283610	AC008432.1	-	processed_pseudogene	NA	NA	NA	noCluster
chr19	11867365	11870717	AC008543.2	-	unprocessed_pseudogene	NA	NA	NA	chr19.3
chr19	20634067	20651342	AC008554.2	+	lncRNA	NA	NA	NA	chr19.4
chr19	12490644	12494495	AC008758.3	-	transcribed_unprocessed_pseudogene	NA	NA	NA	chr19.3
chr19	53365113	53367406	AC010487.1	-	unprocessed_pseudogene	NA	NA	NA	chr19.9
chr19	21404287	21428034	AC010620.2	-	unprocessed_pseudogene	NA	NA	NA	chr19.4
chr19	52417931	52420950	AC011460.1	-	unprocessed_pseudogene	NA	NA	NA	chr19.9
chr19	19944287	19946887	AC011477.1	+	transcribed_unprocessed_pseudogene	NA	NA	NA	chr19.4
chr19	12318152	12320224	AC012618.3	+	transcribed_unprocessed_pseudogene	NA	NA	NA	chr19.3
chr5	150329773	150332016	AC022106.1	-	unprocessed_pseudogene	NA	NA	NA	chr5.1
chr2	203925656	203927117	AC023271.1	-	processed_pseudogene	29.4	Angolan colobus	NA	noCluster
chr17	52030317	52032682	AC023934.1	+	processed_pseudogene	NA	NA	NA	noCluster
chr19	20405903	20414488	AC078899.4	+	unprocessed_pseudogene	NA	NA	NA	chr19.4
chr12	58360849	58362098	AC084033.1	+	processed_pseudogene	NA	NA	NA	noCluster
chr11	40466820	40468691	AC090720.1	-	transcribed_processed_pseudogene	NA	NA	NA	noCluster
chr7	56706637	56718384	AC095038.1	-	unprocessed_pseudogene	NA	NA	NA	noCluster
chr4	26113507	26115431	AC097714.1	+	processed_pseudogene	NA	NA	NA	noCluster
chr2	132844867	132862838	AC098826.1	+	unprocessed_pseudogene	NA	NA	NA	noCluster
chr11	23810843	23812195	AC100768.2	+	lncRNA	NA	NA	NA	noCluster
chr5	105878784	105880022	AC114940.1	-	processed_pseudogene	NA	NA	NA	noCluster
chr7	63465995	63476268	AC115220.1	+	protein_coding	NA	NA	NA	chr7.1
chr4	9385643	9388995	AC116655.1	-	unprocessed_pseudogene	NA	NA	NA	noCluster
chr19	21820778	21839612	AC123912.3	+	unprocessed_pseudogene	NA	NA	NA	chr19.4
chr8	145930955	145933674	AF186192.2	+	transcribed_unprocessed_pseudogene	NA	NA	NA	chr8.1
chr4	103382447	103383409	AF213884.2	+	processed_pseudogene	NA	NA	NA	noCluster
chrX	66593423	66595251	AL049641.1	+	processed_pseudogene	NA	NA	NA	noCluster
chrX	114298540	114299145	AL121878.1	-	processed_pseudogene	NA	NA	NA	noCluster
chr10	132080719	132084868	AL157712.1	-	unprocessed_pseudogene	NA	NA	NA	noCluster
chr9	35147592	35149172	AL353795.1	-	processed_pseudogene	NA	NA	NA	noCluster
chrX	63364943	63366923	AL355852.1	-	processed_pseudogene	NA	NA	NA	noCluster
chr9	69830296	69848755	AL359955.1	+	unprocessed_pseudogene	NA	NA	NA	noCluster
chr1	247353204	247363489	AL390728.4	-	transcribed_unprocessed_pseudogene	NA	NA	NA	chr1.2
chr10	43991469	44020636	AL450326.2	+	unprocessed_pseudogene	NA	NA	NA	chr10.3
chr9	99491392	99500863	AL589843.1	+	lncRNA	NA	NA	NA	chr9.1
chr11	98435878	98437493	AP003038.1	-	processed_pseudogene	NA	NA	NA	noCluster
chr18	15254423	15273147	AP005901.4	+	unprocessed_pseudogene	NA	NA	NA	noCluster
chrX	46322188	46333009	KRBOX4	+	protein_coding	76	Malayan flying lemur	NA	noCluster
chr12	47782932	47784031	LINC02156	+	lncRNA	NA	NA	NA	noCluster
chr10	42830552	42850881	LOC441666	-	NA	NA	NA	NA	chr10.2
chr11	78095955	78096749	not_annotated_1	+	NA	NA	NA	NA	noCluster
chr22	16634902	16653111	not_annotated_2	+	NA	NA	NA	NA	noCluster
chr16	90124281	90141873	PRDM7	-	protein_coding	352	Tibetan Frog	NA	noCluster
chr5	23509587	23527843	PRDM9	+	protein_coding	0	human-specific	-0.397705	noCluster
chr7	5096931	5105190	RBAK	+	protein_coding	105	Tenrec	-0.477565	noCluster
chr19	23990633	24016337	RPSAP58	+	processed_pseudogene	NA	NA	NA	chr19.4
chr16	75200673	75204214	ZFP1	+	protein_coding	105	Armadillo	-0.834442	noCluster
chr19	36831137	36853134	ZFP14	-	protein_coding	105	Tenrec	-1.23624	chr19.6
chr5	178339596	178359694	ZFP2	+	protein_coding	105	Tenrec	NA	chr5.2
chr19	57058882	57066575	ZFP28	+	protein_coding	NA	NA	-1.09648	chr19.10
chr19	38125893	38135631	ZFP30	-	protein_coding	105	Tenrec	-0.304534	chr19.6
chr9	115805028	115812191	ZFP37	-	protein_coding	105	Tenrec	0.301075	noCluster
chr6	29640504	29643830	ZFP57	-	protein_coding	105	Manatee	-1.21295	noCluster
chr1	40954765	40961701	ZFP69	+	protein_coding	105	Armadillo	-0.102665	chr1.1
chr1	40922622	40929231	ZFP69B	+	protein_coding	105	Armadillo	1.10855	chr1.1
chr19	36883657	36898909	ZFP82	-	protein_coding	105	Tenrec	-0.153132	chr19.6
chr16	68591906	68598583	ZFP90	+	protein_coding	105	Armadillo	-1.376	noCluster
chrX	152684136	152686945	ZFP92	+	protein_coding	105	Manatee	-1.51575	noCluster
chr19	58099912	58102718	ZIK1	+	protein_coding	96	White rhinoceros	-1.51575	chr19.11
chrX	123306937	123308270	ZIK1P1	-	processed_pseudogene	105	Armadillo	NA	noCluster
chr19	57285940	57293441	ZIM2	-	protein_coding	159	Opossum	-0.0622906	chr19.10
chr19	57646294	57649960	ZIM3	-	protein_coding	96	Sheep	1.29207	chr19.11
chr7	99627877	99631745	ZKSCAN1	+	protein_coding	159	Opossum	-1.51575	noCluster
chr16	25251229	25263347	ZKSCAN2	-	protein_coding	159	Opossum	1.20949	noCluster
chr6	28331474	28334035	ZKSCAN3	+	protein_coding	159	Tasmanian devil	-0.477565	chr6.1
chr6	28212920	28214864	ZKSCAN4	-	protein_coding	159	Tasmanian devil	-0.737112	chr6.1
chr7	99117815	99124019	ZKSCAN5	+	protein_coding	159	Opossum	-0.758741	chr7.2
chr3	44609804	44612825	ZKSCAN7	+	protein_coding	159	Opossum	0.161319	chr3.2
chr6	28120044	28121762	ZKSCAN8	+	protein_coding	159	Opossum	-0.708273	chr6.1
chr12	133727619	133733533	ZNF10	+	protein_coding	105	Manatee	-1.15239	chr12.1
chr19	21908731	21927863	ZNF100	-	protein_coding	43.2	Nancy Ma's night monkey	0.796573	chr19.4
chr19	19788678	19791046	ZNF101	+	protein_coding	43.2	Marmoset	-0.506404	chr19.4
chr10	28627804	28629862	ZNF101P1	-	processed_pseudogene	0	human-specific	NA	noCluster
chr1	192962729	192963798	ZNF101P2	-	processed_pseudogene	96	Megabat	NA	noCluster
chr7	64151631	64169820	ZNF107	+	protein_coding	43.2	Marmoset	0.528178	chr7.1
chr19	44831678	44844688	ZNF112	-	protein_coding	105	Elephant	-0.956728	chr19.8
chr19	48785633	48790111	ZNF114	+	protein_coding	96	Alpaca	-0.607339	noCluster
chr7	64437209	64442488	ZNF117	-	protein_coding	29.4	Angolan colobus	0.846123	chr7.1
chr7	6730523	6737436	ZNF12	-	protein_coding	105	Tenrec	-1.39463	noCluster
chr11	129165290	129166338	ZNF123P	-	processed_pseudogene	0	human-specific	NA	noCluster
chr1	247319903	247323109	ZNF124	-	protein_coding	43.2	Nancy Ma's night monkey	0.301075	chr1.2
chr19	58944695	58948534	ZNF132	-	protein_coding	105	Manatee	-0.340158	chr19.11
chr20	18286330	18297388	ZNF133	+	protein_coding	105	Tenrec	-0.866885	noCluster
chr19	58130123	58132753	ZNF134	+	protein_coding	105	Manatee	-0.425656	chr19.11
chr19	58572953	58579820	ZNF135	+	protein_coding	105	Manatee	-0.607339	chr19.11
chr19	12296605	12299216	ZNF136	+	protein_coding	74	Coquerel's sifaka	0.021563	chr19.3
chr19	53095360	53100660	ZNF137P	+	transcribed_unprocessed_pseudogene	9.1	Gorilla	NA	chr19.9
chr7	64275301	64293852	ZNF138	+	protein_coding	9.1	Gorilla	3.02631	chr7.1
chr19	19822178	19825290	ZNF14	-	protein_coding	43.2	Bolivian squirrel monkey	0.301075	chr19.4
chr12	133659694	133683168	ZNF140	+	protein_coding	105	Armadillo	-0.607339	chr12.1
chr4	337576	369310	ZNF141	+	protein_coding	43.2	Nancy Ma's night monkey	-0.0622906	chr4.1
chr19	58213011	58216341	ZNF154	-	protein_coding	105	Elephant	0.846123	chr19.11
chr19	44495705	44501443	ZNF155	+	protein_coding	105	Manatee	1.45724	chr19.8
chrX	47269680	47272948	ZNF157	+	protein_coding	105	Manatee	-0.607339	noCluster
chr19	53571353	53578430	ZNF160	-	protein_coding	90	Guinea Pig	-1.24323	chr19.9
chr9	97054628	97063625	ZNF169	+	protein_coding	96	Sheep	-0.524756	noCluster
chr19	57929285	57932840	ZNF17	+	protein_coding	43.2	Nancy Ma's night monkey	-0.44703	chr19.11
chr19	52084649	52091663	ZNF175	+	protein_coding	105	Elephant	0.161319	noCluster
chr19	9489643	9492429	ZNF177	+	protein_coding	105	Manatee	-0.218019	chr19.2
chr17	11881297	11887535	ZNF18	-	protein_coding	312	Painted Turtle	-0.0622906	noCluster
chr19	44980648	44983620	ZNF180	-	protein_coding	105	Manatee	NA	chr19.8
chr19	35230052	35232903	ZNF181	+	protein_coding	105	Armadillo	-0.855088	chr19.5
chrX	47835625	47842805	ZNF182	-	protein_coding	NA	NA	-1.51575	chrX.1
chr6	27419093	27425182	ZNF184	-	protein_coding	105	Armadillo	-1.03764	noCluster
chr9	104162171	104171913	ZNF189	+	protein_coding	105	Manatee	NA	noCluster
chr16	71509228	71512902	ZNF19	-	protein_coding	NA	NA	-0.304534	noCluster
chr11	3380353	3392927	ZNF195	-	protein_coding	43.2	Nancy Ma's night monkey	-0.102665	noCluster
chr3	44673970	44685562	ZNF197	+	protein_coding	105	Tenrec	-0.607339	chr3.2
chr2	95843233	95847830	ZNF2	+	protein_coding	159	Opossum	-1.51575	noCluster
chr19	12243416	12246704	ZNF20	-	protein_coding	NA	NA	0.603879	chr19.3
chr11	123596722	123598964	ZNF202	-	protein_coding	159	Tasmanian devil	-0.834442	noCluster
chr6	27326096	27331075	ZNF204P	-	processed_pseudogene	6.7	Bonobo	NA	noCluster
chr16	3166433	3170239	ZNF205	+	protein_coding	159	Opossum	-1.06155	chr16.1
chr19	22153002	22171705	ZNF208	-	protein_coding	6.7	Chimpanzee(v4)	1.66369	chr19.4
chr19	22646730	22655464	ZNF209P	+	unprocessed_pseudogene	6.7	Chimpanzee	NA	chr19.4
chr19	58146002	58153531	ZNF211	+	protein_coding	96	Dog	-0.689922	chr19.11
chr7	148947777	148951449	ZNF212	+	protein_coding	312.1	Budgerigar	-0.910143	chr7.3
chr16	3188981	3191321	ZNF213	+	protein_coding	159	Opossum	-1.15239	chr16.1
chr11	7021185	7024060	ZNF214	-	protein_coding	105	Armadillo	2.1179	noCluster
chr11	6964319	6977744	ZNF215	+	protein_coding	312	Painted Turtle	0.301075	noCluster
chr19	44469107	44471569	ZNF221	+	protein_coding	105	Manatee	0.949941	chr19.8
chr19	44531180	44537000	ZNF222	+	protein_coding	105	Manatee	0.301075	chr19.8
chr19	44564613	44571331	ZNF223	+	protein_coding	105	Manatee	0.0739714	chr19.8
chr19	44604959	44612502	ZNF224	+	protein_coding	105	Manatee	0.301075	chr19.8
chr19	44622346	44636705	ZNF225	+	protein_coding	105	Manatee	0.514819	chr19.8
chr19	44676246	44681746	ZNF226	+	protein_coding	105	Armadillo	0.942308	chr19.8
chr19	44732604	44740965	ZNF227	+	protein_coding	105	Manatee	-0.767647	chr19.8
chr19	44932501	44936535	ZNF229	-	protein_coding	105	Armadillo	0.0873304	chr19.8
chr16	71482013	71488065	ZNF23	-	protein_coding	105	Tenrec	0.0739714	noCluster
chr19	44512947	44515517	ZNF230	+	protein_coding	105	Manatee	0.560621	chr19.8
chr19	44770356	44778739	ZNF233	+	protein_coding	105	Manatee	0.560621	chr19.8
chr19	44652929	44662191	ZNF234	+	protein_coding	105	Manatee	0.502944	chr19.8
chr19	44791388	44803879	ZNF235	-	protein_coding	105	Elephant	-0.347792	chr19.8
chr10	44052168	44063463	ZNF239	-	protein_coding	105	Manatee	-0.910143	chr10.3
chr10	38120572	38127033	ZNF248	-	protein_coding	105	Tenrec	-0.996659	chr10.1
chr10	38241081	38246468	ZNF25	-	protein_coding	105	Elephant	0.755281	chr10.1
chr8	146106911	146115438	ZNF250	-	protein_coding	105	Armadillo	-1.376	chr8.1
chr8	145947196	145979697	ZNF251	-	protein_coding	105	Manatee	-0.607339	chr8.1
chr8	146201678	146225109	ZNF252P	-	transcribed_unprocessed_pseudogene	159	Tasmanian devil	NA	chr8.1
chr19	19989295	20003642	ZNF253	+	protein_coding	29.4	Black snub-nosed monkey	0.301075	chr19.4
chr19	24288747	24311453	ZNF254	+	protein_coding	43.2	Marmoset	1.83839	chr19.4
chr19	58452300	58455422	ZNF256	-	protein_coding	105	Armadillo	0.179953	chr19.11
chr19	22255616	22272651	ZNF257	+	protein_coding	29.4	Rhesus macaque	0.796573	chr19.4
chr12	133583633	133588061	ZNF26	+	protein_coding	105	Armadillo	NA	chr12.1
chr16	3336028	3340549	ZNF263	+	protein_coding	159	Tasmanian devil	-0.910143	chr16.1
chr19	57705248	57724228	ZNF264	+	protein_coding	105	Manatee	-0.257949	chr19.11
chr19	9522971	9529301	ZNF266	-	protein_coding	90	Rabbit	1.66369	chr19.2
chr16	31895824	31928109	ZNF267	+	protein_coding	43.2	Marmoset	-0.218019	noCluster
chr12	133768080	133781098	ZNF268	+	protein_coding	105	Elephant	0.14309	chr12.1
chr7	64377964	64389482	ZNF273	+	protein_coding	43.2	Nancy Ma's night monkey	0.482757	chr7.1
chr19	58697084	58724470	ZNF274	+	protein_coding	NA	NA	-1.51575	chr19.11
chrX	152610134	152613427	ZNF275	+	protein_coding	159	Opossum	-1.51575	noCluster
chr19	53301707	53311380	ZNF28	-	protein_coding	76	Malayan flying lemur	0.543318	chr19.9
chr7	148903793	148921679	ZNF282	+	protein_coding	312.1	Anole lizard	-1.15239	chr7.3
chr19	44341210	44353275	ZNF283	+	protein_coding	105	Manatee	-0.910143	chr19.8
chr19	44585173	44591314	ZNF284	+	protein_coding	105	Manatee	0.301075	chr19.8
chr19	44890720	44896624	ZNF285	-	protein_coding	105	Elephant	1.57285	chr19.8
chr19	44971878	44977358	ZNF285B	+	unprocessed_pseudogene	105	Elephant	NA	chr19.8
chr17	15609706	15620586	ZNF286A	+	protein_coding	159	Tasmanian devil	NA	noCluster
chr17	16455193	16467133	ZNF287	-	protein_coding	105	Armadillo	-1.25621	noCluster
chr7	99668852	99672878	ZNF3	-	protein_coding	159	Opossum	-1.51575	noCluster
chr19	35422776	35435724	ZNF30	+	protein_coding	96	Horse	1.77725	chr19.5
chr5	150275003	150278110	ZNF300	-	protein_coding	105	Elephant	-0.455936	chr5.1
chr5	150310342	150322232	ZNF300P1	-	transcribed_unprocessed_pseudogene	105	Elephant	NA	chr5.1
chr19	35173681	35176451	ZNF302	+	protein_coding	105	Armadillo	2.1179	chr19.5
chr19	57865098	57869148	ZNF304	+	protein_coding	105	Manatee	-0.834442	chr19.11
chr6	28962876	28967384	ZNF311	-	protein_coding	105	Armadillo	-0.347792	noCluster
chr7	6683458	6694038	ZNF316	+	protein_coding	159	Opossum	NA	noCluster
chr19	9267949	9272061	ZNF317	+	protein_coding	105	Manatee	-1.09648	chr19.2
chr19	53383908	53391500	ZNF320	-	protein_coding	76	Malayan flying lemur	-0.855088	chr19.9
chr19	58980552	58983368	ZNF324	+	protein_coding	105	Tenrec	-1.51575	chr19.11
chr19	58965068	58967820	ZNF324B	+	protein_coding	105	Armadillo	-0.910143	chr19.11
chr19	54074863	54081197	ZNF331	+	protein_coding	105	Elephant	-0.910143	chr19.9
chr19	14805827	14830059	ZNF333	+	protein_coding	NA	NA	-0.0622906	noCluster
chr20	45129943	45133373	ZNF334	-	protein_coding	105	Armadillo	-0.218019	noCluster
chr20	25655635	25666752	ZNF337	-	protein_coding	43.2	Bolivian squirrel monkey	0.301075	noCluster
chr10	38305822	38345365	ZNF33A	+	protein_coding	105	Armadillo	-0.0395802	chr10.1
chr10	43088084	43127863	ZNF33B	-	protein_coding	105	Armadillo	-0.493787	chr10.2
chr8	145998674	146003543	ZNF34	-	protein_coding	105	Manatee	-1.21295	chr8.1
chr20	2463809	2473465	ZNF343	-	protein_coding	NA	NA	-0.359589	noCluster
chr19	37339364	37369160	ZNF345	+	protein_coding	43.2	Nancy Ma's night monkey	NA	chr19.6
chr19	53643012	53652614	ZNF347	-	protein_coding	43.2	Bolivian squirrel monkey	0.407947	chr19.9
chr19	52468433	52472378	ZNF350	-	protein_coding	105	Manatee	0.528178	chr19.9
chr5	178139078	178154120	ZNF354A	-	protein_coding	105	Elephant	-0.816972	chr5.2
chr5	178293250	178311253	ZNF354B	+	protein_coding	105	Tenrec	-0.956728	chr5.2
chr5	178503451	178506987	ZNF354C	+	protein_coding	105	Tenrec	-0.0292574	chr5.2
chr21	14467679	14486105	ZNF355P	-	unprocessed_pseudogene	20.2	Gibbon	NA	noCluster
chr10	38403688	38408217	ZNF37A	+	protein_coding	96	Alpaca	-0.425656	chr10.1
chr10	43014691	43019180	ZNF37BP	-	transcribed_processed_pseudogene	105	Manatee	NA	chr10.2
chr10	38172546	38185734	ZNF37CP-ZNF33CP	+	NA	NA	NA	NA	chr10.1
chr19	37100834	37118425	ZNF382	+	protein_coding	105	Manatee	-1.51575	chr19.6
chr19	37726456	37734554	ZNF383	+	protein_coding	105	Elephant	-0.855088	chr19.6
chr7	99091196	99096459	ZNF394	-	protein_coding	105	Elephant	-0.996659	chr7.2
chr7	148863255	148876734	ZNF398	+	protein_coding	312.1	American Alligator	-1.06155	chr7.3
chr22	17336693	17354865	ZNF402P	+	processed_pseudogene	NA	NA	NA	noCluster
chr19	44376727	44384282	ZNF404	-	protein_coding	105	Manatee	0.560621	chr19.8
chrX	47306861	47315791	ZNF41	-	protein_coding	105	Armadillo	-1.19514	noCluster
chr19	53611659	53619686	ZNF415	-	protein_coding	90	Guinea Pig	0.961739	chr19.9
chr18	9785120	9787745	ZNF415P1	+	processed_pseudogene	NA	NA	NA	noCluster
chr19	58083555	58087292	ZNF416	-	protein_coding	90	Naked mole-rat female	-1.02025	chr19.11
chr19	58419853	58423548	ZNF417	-	protein_coding	74	Bushbaby	-0.00172969	chr19.11
chr19	58437541	58441916	ZNF418	-	protein_coding	105	Elephant	NA	chr19.11
chr19	58002844	58005513	ZNF419	+	protein_coding	105	Elephant	1.95274	chr19.11
chr19	37581902	37619888	ZNF420	+	protein_coding	105	Tenrec	-0.559527	chr19.6
chr7	148800730	148815434	ZNF425	-	protein_coding	96	Horse	-0.463905	chr7.3
chr19	9638978	9644636	ZNF426	-	protein_coding	90	Mouse	0.466241	chr19.2
chr19	21712465	21720784	ZNF429	+	protein_coding	29.4	Sooty mangabey	2.23902	chr19.4
chr19	21989721	22002017	ZNF43	-	protein_coding	43.2	Marmoset	1.63979	chr19.4
chr19	21216267	21241521	ZNF430	+	protein_coding	43.2	Nancy Ma's night monkey	0.135909	chr19.4
chr19	21349143	21366871	ZNF431	+	protein_coding	43.2	Nancy Ma's night monkey	-1.06155	chr19.4
chr19	52536990	52544853	ZNF432	-	protein_coding	105	Manatee	0.301075	chr19.9
chr19	12125677	12129101	ZNF433	-	protein_coding	74	Grey mouse lemur	1.00762	chr19.3
chr1	23688470	23693655	ZNF436	-	protein_coding	159	Opossum	-0.910143	noCluster
chr19	11977025	11980114	ZNF439	+	protein_coding	9.1	Gorilla	0.466241	chr19.3
chr19	12383239	12386891	ZNF44	-	protein_coding	NA	NA	0.179953	chr19.3
chr19	12358100	12361177	ZNF44_alt	-	NA	NA	NA	NA	chr19.3
chr19	11941103	11944622	ZNF440	+	protein_coding	29.4	Pig-tailed macaque	1.20949	chr19.3
chr19	11888431	11893050	ZNF441	+	protein_coding	43.2	Nancy Ma's night monkey	-1.27351	chr19.3
chr19	12460532	12463922	ZNF442	-	protein_coding	76	Malayan flying lemur	-0.546778	chr19.3
chr19	12540972	12544005	ZNF443	-	protein_coding	76	Malayan flying lemur	0.982385	chr19.3
chr3	44488078	44492059	ZNF445	-	protein_coding	105	Tenrec	-1.38598	chr3.2
chr19	58991006	58992075	ZNF446	+	protein_coding	159	Opossum	-0.304534	chr19.11
chr19	44417601	44423845	ZNF45	-	protein_coding	105	Elephant	-0.218019	chr19.8
chr5	178373365	178392959	ZNF454	+	protein_coding	105	Tenrec	-0.304534	chr5.2
chr19	57795924	57803403	ZNF460	+	protein_coding	105	Manatee	-1.15239	chr19.11
chr19	37129614	37149321	ZNF461	-	protein_coding	105	Elephant	-0.607339	chr19.6
chr19	53342807	53352460	ZNF468	-	protein_coding	76	Malayan flying lemur	0.502944	chr19.9
chr19	57085768	57089894	ZNF470	+	protein_coding	105	Tenrec	0.528178	chr19.10
chr19	57027649	57037299	ZNF471	+	protein_coding	105	Tenrec	0.949941	chr19.10
chr19	50542423	50550292	ZNF473	+	protein_coding	105	Tenrec	-0.506404	noCluster
chr7	57187415	57194419	ZNF479	-	protein_coding	20.2	Gibbon	-0.0292574	noCluster
chr19	52817411	52826184	ZNF480	+	protein_coding	43.2	Nancy Ma's night monkey	0.301075	chr19.9
chr9	114296024	114305438	ZNF483	+	protein_coding	105	Manatee	-1.35059	noCluster
chr9	95608674	95618594	ZNF484	-	protein_coding	105	Armadillo	-0.218019	noCluster
chr10	44104067	44112787	ZNF485	+	protein_coding	105	Armadillo	-0.689922	chr10.3
chr19	20295170	20308887	ZNF486	+	protein_coding	29.4	Golden snub-nosed monkey	2.31977	chr19.4
chr10	43971174	43978429	ZNF487	+	protein_coding	105	Armadillo	NA	chr10.3
chr19	12691316	12694364	ZNF490	-	protein_coding	43.2	Bolivian squirrel monkey	-0.677217	chr19.3
chr19	11915362	11918067	ZNF491	+	protein_coding	15.8	Orangutan	NA	chr19.3
chr19	22836114	22847968	ZNF492	+	protein_coding	43.2	Nancy Ma's night monkey	0.452477	chr19.4
chr19	21587936	21609214	ZNF493	+	protein_coding	29.4	Black snub-nosed monkey	1.51229	chr19.4
chr16	4802442	4810583	ZNF500	-	protein_coding	159	Opossum	-1.51575	noCluster
chr19	19905274	19917871	ZNF506	-	protein_coding	43.2	Bolivian squirrel monkey	0.528178	chr19.4
chr9	99521161	99525908	ZNF510	-	protein_coding	105	Armadillo	0.301075	chr9.1
chr2	95814407	95818998	ZNF514	-	protein_coding	105	Elephant	1.20949	noCluster
chr8	146029031	146033723	ZNF517	+	protein_coding	105	Armadillo	0.301075	chr8.1
chr18	14104843	14124469	ZNF519	-	protein_coding	96	Shrew	0.704814	noCluster
chr10	82057538	82059247	ZNF519P1	+	processed_pseudogene	NA	NA	NA	noCluster
chr19	53879028	53887302	ZNF525	+	protein_coding	20.2	Gibbon	1.33926	chr19.9
chr19	37870027	37880763	ZNF527	+	protein_coding	105	Elephant	-0.855088	chr19.6
chr19	52909165	52919986	ZNF528	+	protein_coding	43.2	Bolivian squirrel monkey	1.99678	chr19.9
chr19	37037875	37045692	ZNF529	-	protein_coding	105	Armadillo	0.301075	chr19.6
chr19	58115653	58118684	ZNF530	+	protein_coding	29.4	Drill	0.301075	chr19.11
chr19	52937213	52942681	ZNF534	+	protein_coding	96	Dog	NA	chr19.9
chr19	38090532	38104152	ZNF540	+	protein_coding	90	Squirrel	0.194203	chr19.6
chr19	56884531	56889317	ZNF542P	+	transcribed_unprocessed_pseudogene	NA	NA	NA	chr19.10
chr19	57835055	57840581	ZNF543	+	protein_coding	105	Manatee	0.999854	chr19.11
chr19	58757672	58774428	ZNF544	+	protein_coding	29.4	Angolan colobus	0.755281	chr19.11
chr19	40513186	40521658	ZNF546	+	protein_coding	105	Manatee	0.466241	chr19.7
chr19	57883155	57889544	ZNF547	+	protein_coding	105	Manatee	0.301075	chr19.11
chr19	57908421	57911235	ZNF548	+	protein_coding	96	Minke whale	-0.524756	chr19.11
chr19	58046517	58050277	ZNF549	+	protein_coding	96	White rhinoceros	0.161319	chr19.11
chr19	58058176	58067719	ZNF550	-	protein_coding	NA	NA	0.0415281	chr19.11
chr19	58196632	58199638	ZNF551	+	protein_coding	96	Dog	0.430848	chr19.11
chr19	58319425	58324782	ZNF552	-	protein_coding	29.4	Drill	-0.0622906	chr19.11
chr19	2827620	2834775	ZNF554	+	protein_coding	105	Manatee	-0.218019	chr19.1
chr19	2850590	2853821	ZNF555	+	protein_coding	96	Chinese pangolin	-0.667899	chr19.1
chr19	2873499	2878297	ZNF556	+	protein_coding	96	Ferret	1.71416	chr19.1
chr19	7076397	7083740	ZNF557	+	protein_coding	105	Manatee	0.301075	noCluster
chr19	8921971	8931976	ZNF558	-	protein_coding	105	Manatee	-0.910143	noCluster
chr19	9449874	9453971	ZNF559	+	protein_coding	43.2	Nancy Ma's night monkey	0.502944	chr19.2
chr19	9577170	9584995	ZNF560	-	protein_coding	NA	NA	-0.607339	chr19.2
chr19	9720923	9727841	ZNF561	-	protein_coding	43.2	Bolivian squirrel monkey	NA	chr19.2
chr19	9763485	9768805	ZNF562	-	protein_coding	43.2	Nancy Ma's night monkey	-0.607339	chr19.2
chr19	12428721	12433519	ZNF563	-	protein_coding	76	Malayan flying lemur	1.02781	chr19.3
chr19	12637340	12639504	ZNF564	-	protein_coding	76	Malayan flying lemur	-0.546778	chr19.3
chr19	36673376	36699536	ZNF565	-	protein_coding	NA	NA	-1.06155	chr19.6
chr19	36939968	36964354	ZNF566	-	protein_coding	105	Armadillo	-0.737112	chr19.6
chr19	37203293	37211543	ZNF567	+	protein_coding	105	Manatee	-0.996659	chr19.6
chr19	37427653	37441963	ZNF568	+	protein_coding	NA	NA	0.179953	chr19.6
chr19	37482080	37488600	ZNF568_alt	+	NA	NA	NA	NA	chr19.6
chr19	37903507	37917274	ZNF569	-	protein_coding	105	Elephant	-0.506404	chr19.6
chr19	2915525	2918197	ZNF57	+	protein_coding	29.4	Black snub-nosed monkey	0.580587	chr19.1
chr19	37966788	37976084	ZNF570	+	protein_coding	105	Tenrec	-0.194423	chr19.6
chr19	38055505	38074992	ZNF571	-	protein_coding	105	Tenrec	0.528178	chr19.6
chr19	38229410	38262324	ZNF573	-	protein_coding	96	Ferret	1.06605	chr19.6
chr19	52376114	52381762	ZNF577	-	protein_coding	105	Armadillo	1.07971	chr19.9
chr19	53007913	53015998	ZNF578	+	protein_coding	9.1	Gorilla	1.20949	chr19.9
chr19	56895286	56901864	ZNF582	-	protein_coding	105	Armadillo	-0.102665	chr19.10
chr19	56925333	56935653	ZNF583	+	protein_coding	105	Tenrec	-1.51575	chr19.10
chr19	58921337	58929097	ZNF584	+	protein_coding	105	Armadillo	-0.607339	chr19.11
chr19	37642496	37647251	ZNF585A	-	protein_coding	105	Elephant	-0.879863	chr19.6
chr19	37676134	37681046	ZNF585B	-	protein_coding	105	Elephant	-0.243973	chr19.6
chr19	58287916	58291140	ZNF586	+	protein_coding	96	White rhinoceros	-0.607339	chr19.11
chr19	58367480	58371572	ZNF587	+	protein_coding	74	Bushbaby	0.580587	chr19.11
chr19	58350396	58353926	ZNF587B	+	protein_coding	9.1	Gorilla	0.301075	chr19.11
chr3	31836003	31837575	ZNF587P1	+	processed_pseudogene	6.7	Chimpanzee	NA	noCluster
chr3	48302308	48311167	ZNF589	+	protein_coding	NA	NA	0.301075	noCluster
chr4	59328	87317	ZNF595	+	protein_coding	43.2	Bolivian squirrel monkey	NA	chr4.1
chr8	192892	196338	ZNF596	+	protein_coding	96	Megabat	1.6224	noCluster
chr16	3486441	3490927	ZNF597	-	protein_coding	105	Armadillo	-0.218019	chr16.1
chr19	35249950	35260454	ZNF599	-	protein_coding	105	Armadillo	0.0415281	chr19.5
chr19	53268440	53277948	ZNF600	-	protein_coding	29.4	Olive baboon	-1.28865	chr19.9
chr12	133501967	133509741	ZNF605	-	protein_coding	105	Tenrec	NA	chr12.1
chr19	58489689	58500083	ZNF606	-	protein_coding	105	Elephant	-1.09648	chr19.11
chr19	38188946	38200717	ZNF607	-	protein_coding	74	Bushbaby	0.301075	chr19.6
chr19	52856940	52870155	ZNF610	+	protein_coding	43.2	Marmoset	1.8908	chr19.9
chr19	53207538	53217388	ZNF611	-	protein_coding	29.4	Olive baboon	0.161319	chr19.9
chr19	52443467	52448741	ZNF613	+	protein_coding	105	Elephant	-0.689922	chr19.9
chr19	52519167	52521741	ZNF614	-	protein_coding	105	Elephant	-0.789021	chr19.9
chr19	52496138	52505528	ZNF615	-	protein_coding	105	Manatee	0.301075	chr19.9
chr19	52616502	52627296	ZNF616	-	protein_coding	43.2	Marmoset	0.301075	chr19.9
chr3	40523386	40529435	ZNF619	+	protein_coding	105	Manatee	0.119392	chr3.1
chr3	40552966	40558327	ZNF620	+	protein_coding	NA	NA	0.820168	chr3.1
chr3	40570815	40574284	ZNF621	+	protein_coding	105	Manatee	0.0415281	chr3.1
chr17	16525625	16538064	ZNF624	-	protein_coding	105	Armadillo	-0.69818	noCluster
chr19	12256171	12258611	ZNF625	-	protein_coding	74	Grey mouse lemur	-0.737112	chr19.3
chr19	20806838	20829205	ZNF626	-	protein_coding	29.4	Rhesus macaque	0.482757	chr19.4
chr19	11725347	11728641	ZNF627	+	protein_coding	74	Coquerel's sifaka	-0.243973	chr19.3
chrX	47917801	47920318	ZNF630	-	protein_coding	105	Elephant	-0.689922	chrX.1
chr12	48736806	48739251	ZNF641	-	protein_coding	105	Manatee	-0.789021	noCluster
chr19	52394032	52400225	ZNF649	-	protein_coding	105	Manatee	-0.607339	chr19.9
chr7	99159996	99171351	ZNF655	+	protein_coding	96	Cow	NA	chr7.2
chr9	40772139	40784597	ZNF658	-	protein_coding	105	Elephant	NA	noCluster
chr9	39444541	39457000	ZNF658B-1	-	NA	NA	NA	NA	noCluster
chr9	41589560	41602018	ZNF658B-2	-	NA	NA	NA	NA	noCluster
chr19	20975323	20990083	ZNF66	+	protein_coding	29.4	Pig-tailed macaque	1.20949	chr19.4
chr3	42949519	42956795	ZNF662	+	protein_coding	105	Tenrec	0.982385	noCluster
chr19	53667167	53678818	ZNF665	-	protein_coding	90	Guinea Pig	1.10855	chr19.9
chr19	56952548	56972178	ZNF667	-	protein_coding	105	Tenrec	-0.347792	chr19.10
chr1	247263750	247265409	ZNF669	-	protein_coding	105	Elephant	0.906684	chr1.2
chr1	247200762	247202833	ZNF670	-	protein_coding	43.2	Marmoset	1.43659	chr1.2
chr19	58231704	58234702	ZNF671	-	protein_coding	105	Manatee	-0.304534	chr19.11
chrX	46359298	46388338	ZNF674	-	protein_coding	105	Armadillo	-0.524756	noCluster
chr19	23836060	23845954	ZNF675	-	protein_coding	29.4	Black snub-nosed monkey	0.796573	chr19.4
chr19	22362097	22379522	ZNF676	-	protein_coding	15.8	Orangutan	0.0415281	chr19.4
chr19	53740368	53747144	ZNF677	-	protein_coding	105	Armadillo	-0.0622906	chr19.9
chr1	227834250	227843463	ZNF678	+	protein_coding	29.4	Sooty mangabey	1.85835	noCluster
chr7	63720604	63727826	ZNF679	+	protein_coding	43.2	Marmoset	0.820168	chr7.1
chr7	63981204	64004804	ZNF680	-	protein_coding	43.2	Marmoset	0.603879	chr7.1
chr19	23925883	23938347	ZNF681	-	protein_coding	29.4	African Green Monkey	1.12691	chr19.4
chr19	20116721	20135179	ZNF682	-	protein_coding	43.2	Bolivian squirrel monkey	0.846123	chr19.4
chr1	41006263	41013126	ZNF684	+	protein_coding	105	Tenrec	-0.834442	chr1.1
chr16	30581368	30582875	ZNF688	-	protein_coding	159	Opossum	0.301075	chr16.2
chr16	30615653	30621278	ZNF689	-	protein_coding	105	Manatee	-1.15239	chr16.2
chr19	12014393	12017064	ZNF69	+	protein_coding	29.4	African Green Monkey	NA	chr19.3
chr1	247150274	247163370	ZNF695	-	protein_coding	43.2	Nancy Ma's night monkey	0.301075	chr1.2
chr19	9406168	9413174	ZNF699	-	protein_coding	105	Tenrec	0.171301	chr19.2
chr8	146054868	146068544	ZNF7	+	protein_coding	105	Armadillo	-1.12643	chr8.1
chr19	12058001	12061412	ZNF700	+	protein_coding	NA	NA	0.502944	chr19.3
chr19	53079153	53087273	ZNF701	+	protein_coding	29.4	Black snub-nosed monkey	2.63699	chr19.9
chr12	8326927	8330278	ZNF705A	+	protein_coding	312	Painted Turtle	-0.910143	noCluster
chr8	7806656	7810012	ZNF705B	+	protein_coding	312	Painted Turtle	NA	noCluster
chr8	12213654	12217003	ZNF705C	+	NA	312	Painted Turtle	NA	noCluster
chr8	11967414	11970766	ZNF705D	+	protein_coding	312	Painted Turtle	NA	noCluster
chr11	71527458	71530811	ZNF705E	-	protein_coding	312	Painted Turtle	NA	noCluster
chr8	7215398	7218752	ZNF705G	-	protein_coding	312	Painted Turtle	6.65997	noCluster
chr8	144773248	144776682	ZNF707	+	protein_coding	105	Elephant	-0.996659	noCluster
chr19	21475855	21493423	ZNF708	-	protein_coding	43.2	Nancy Ma's night monkey	1.59881	chr19.4
chr19	12574122	12577658	ZNF709	-	protein_coding	NA	NA	-1.32451	chr19.3
chr19	57125185	57134119	ZNF71	+	protein_coding	105	Tenrec	NA	chr19.10
chr7	55990860	56007627	ZNF713	+	protein_coding	312	Painted Turtle	-0.0622906	noCluster
chr19	21280996	21301448	ZNF714	+	protein_coding	43.2	Nancy Ma's night monkey	0.906684	chr19.4
chr7	57522171	57530230	ZNF716	+	protein_coding	43.2	Marmoset	1.51229	noCluster
chr3	75786097	75790881	ZNF717	-	protein_coding	NA	NA	NA	noCluster
chr4	59328	155306	ZNF718	+	protein_coding	NA	NA	NA	chr4.1
chr16	31733952	31767101	ZNF720	+	protein_coding	43.2	Marmoset	NA	noCluster
chr4	435425	466484	ZNF721	-	protein_coding	NA	NA	0.77503	chr4.1
chr19	23031068	23041202	ZNF723	+	protein_coding	15.8	Orangutan	NA	chr19.4
chr19	23404795	23415089	ZNF724	-	protein_coding	NA	NA	NA	chr19.4
chr19	23674387	23688777	ZNF725P	-	unprocessed_pseudogene	6.7	Bonobo	NA	chr19.4
chr19	24102180	24118949	ZNF726	+	protein_coding	29.4	Olive baboon	2.24767	chr19.4
chr7	63529274	63539681	ZNF727	+	protein_coding	20.2	Gibbon	0.66444	chr7.1
chr19	23157793	23171247	ZNF728	-	protein_coding	29.4	Drill	0.0415281	chr19.4
chr19	22486565	22501475	ZNF729	+	protein_coding	29.4	African Green Monkey	0.942308	chr19.4
chr14	19170512	19188731	ZNF72P	-	unprocessed_pseudogene	20.2	Gibbon	NA	noCluster
chr19	23316887	23329672	ZNF730	+	protein_coding	29.4	Black snub-nosed monkey	0.301075	chr19.4
chr4	262778	289938	ZNF732	-	protein_coding	29.4	Golden snub-nosed monkey	2.52164	chr4.1
chr7	62751759	62758764	ZNF733P	-	transcribed_unprocessed_pseudogene	20.2	Gibbon	NA	noCluster
chr7	62910202	62917202	ZNF734P	+	unprocessed_pseudogene	20.2	Gibbon	NA	noCluster
chr7	63673475	63680801	ZNF735	+	protein_coding	NA	NA	NA	chr7.1
chr7	63796642	63809579	ZNF736	+	protein_coding	43.2	Bolivian squirrel monkey	0.0992051	chr7.1
chr19	20726376	20736635	ZNF737	-	protein_coding	29.4	Rhesus macaque	1.13961	chr19.4
chr19	21558045	21569928	ZNF738	+	protein_coding	NA	NA	NA	chr19.4
chr22	20754927	20761057	ZNF74	+	protein_coding	105	Armadillo	-0.758741	noCluster
chr7	149171645	149191200	ZNF746	-	protein_coding	159	Tasmanian devil	-1.51575	chr7.3
chr16	30543951	30545892	ZNF747	-	protein_coding	159	Opossum	NA	chr16.2
chr19	57953258	57956835	ZNF749	+	protein_coding	43.2	Nancy Ma's night monkey	0.580587	chr19.11
chr16	3363054	3367863	ZNF75A	+	protein_coding	NA	NA	-0.0622906	chr16.1
chr12	44402458	44403244	ZNF75BP	-	processed_pseudogene	NA	NA	NA	noCluster
chrX	134421104	134425055	ZNF75D	-	protein_coding	312	Painted Turtle	-0.0622906	noCluster
chr19	53952770	53960808	ZNF761	+	protein_coding	29.4	Crab-eating macaque	NA	chr19.9
chr19	12087858	12090946	ZNF763	+	protein_coding	6.7	Bonobo	1.39117	chr19.3
chr16	30566646	30569428	ZNF764	-	protein_coding	159	Opossum	0.603879	chr16.2
chr19	53905323	53914243	ZNF765	+	protein_coding	15.8	Orangutan	0.301075	chr19.9
chr19	52785369	52794588	ZNF766	+	protein_coding	43.2	Bolivian squirrel monkey	-0.607339	chr19.9
chr19	2933498	2939399	ZNF77	-	protein_coding	76	Malayan flying lemur	1.36089	chr19.1
chr19	57984659	57987148	ZNF772	-	protein_coding	105	Elephant	1.02781	chr19.11
chr19	58016033	58018847	ZNF773	+	protein_coding	105	Manatee	0.502944	chr19.11
chr19	58262158	58266700	ZNF776	+	protein_coding	96	White rhinoceros	-1.11201	chr19.11
chr7	149128878	149151322	ZNF777	-	protein_coding	312.1	Medium Ground Finch	-1.51575	chr7.3
chr16	89289570	89295030	ZNF778	+	protein_coding	74	Bushbaby	1.33926	noCluster
chr19	40579688	40589138	ZNF780A	-	protein_coding	74	Grey mouse lemur	0.301075	chr19.7
chr19	40539520	40554697	ZNF780B	-	protein_coding	74	Grey mouse lemur	0.993199	chr19.7
chr19	38159296	38167290	ZNF781	-	protein_coding	6.7	Chimpanzee(v4)	NA	chr19.6
chr9	99580216	99607292	ZNF782	-	protein_coding	105	Elephant	-0.194423	chr9.1
chr7	148963915	148979341	ZNF783	+	protein_coding	312.1	Medium Ground Finch	-1.06155	chr7.3
chr16	30594012	30596848	ZNF785	-	protein_coding	96	White rhinoceros	0.301075	chr16.2
chr7	148767601	148777803	ZNF786	-	protein_coding	159	Tasmanian devil	-0.0882452	chr7.3
chr19	12221125	12224519	ZNF788P	+	transcribed_unprocessed_pseudogene	NA	NA	NA	noCluster
chr7	99077289	99085090	ZNF789	+	protein_coding	159	Tasmanian devil	-0.996659	chr7.2
chr19	37309577	37314689	ZNF790	-	protein_coding	105	Elephant	0.755281	chr19.6
chr19	12734519	12740065	ZNF791	+	protein_coding	90	Rat	-1.30201	chr19.3
chr19	35449006	35451892	ZNF792	-	protein_coding	96	Shrew	-0.758741	chr19.5
chr19	38023263	38028727	ZNF793	+	protein_coding	105	Elephant	0.603879	chr19.6
chr19	12501282	12504231	ZNF799	-	protein_coding	76	Malayan flying lemur	NA	chr19.3
chr19	58797088	58806641	ZNF8	+	protein_coding	105	Manatee	-1.25621	chr19.11
chr19	57755296	57765950	ZNF805	+	protein_coding	105	Manatee	-0.956728	chr19.11
chr2	133070447	133076219	ZNF806	+	unprocessed_pseudogene	105	Elephant	NA	noCluster
chr19	35033456	35036291	ZNF807	-	unprocessed_pseudogene	105	Armadillo	NA	chr19.5
chr19	53050770	53059278	ZNF808	+	protein_coding	29.4	Drill	0.383658	chr19.9
chrX	47747403	47776025	ZNF81	+	protein_coding	105	Manatee	-1.51575	chrX.1
chr19	9800861	9804490	ZNF812P	-	transcribed_unprocessed_pseudogene	NA	NA	NA	chr19.2
chr19	53989891	53996278	ZNF813	+	protein_coding	29.4	Crab-eating macaque	-0.153132	chr19.9
chr19	58383872	58388404	ZNF814	-	protein_coding	43.2	Bolivian squirrel monkey	0.631407	chr19.11
chr7	5879585	5887363	ZNF815P	+	transcribed_unprocessed_pseudogene	0	human-specific	NA	noCluster
chr19	53452684	53456124	ZNF816	-	protein_coding	NA	NA	1.13961	chr19.9
chr19	53707274	53716979	ZNF818P	+	NA	NA	NA	NA	chr19.9
chr19	11832533	11836136	ZNF823	-	protein_coding	76	Malayan flying lemur	-0.266684	chr19.3
chr19	20577316	20592751	ZNF826P	-	transcribed_unprocessed_pseudogene	9.1	Gorilla	NA	chr19.4
chr19	20508157	20520759	ZNF826P_alt	-	NA	NA	NA	NA	chr19.4
chr19	37382402	37399355	ZNF829	-	protein_coding	105	Elephant	0.0992051	chr19.6
chr19	53155743	53183669	ZNF83	-	protein_coding	NA	NA	-1.38598	chr19.9
chr19	53116215	53122309	ZNF83_alt	-	NA	NA	NA	NA	chr19.9
chr19	11793366	11797043	ZNF833P	+	transcribed_unprocessed_pseudogene	NA	NA	NA	chr19.3
chr19	52658199	52663838	ZNF836	-	protein_coding	43.2	Bolivian squirrel monkey	-0.0774308	chr19.9
chr12	133624546	133635500	ZNF84	+	protein_coding	105	Armadillo	NA	chr12.1
chr20	45113105	45121261	ZNF840P	+	unprocessed_pseudogene	NA	NA	NA	noCluster
chr19	52568437	52580331	ZNF841	-	protein_coding	43.2	Bolivian squirrel monkey	-0.463905	chr19.9
chr19	12184851	12188514	ZNF844	+	protein_coding	29.4	Golden snub-nosed monkey	1.51229	chr19.3
chr19	53848764	53857489	ZNF845	+	protein_coding	29.4	Crab-eating macaque	0.737113	chr19.9
chr19	9867398	9874078	ZNF846	-	protein_coding	105	Manatee	1.6224	chr19.2
chr1	227884599	227894382	ZNF847P	-	unprocessed_pseudogene	9.1	Gorilla	NA	noCluster
chr19	21116835	21133084	ZNF85	+	protein_coding	29.4	Drill	0.906684	chr19.4
chr19	37238680	37253327	ZNF850	-	protein_coding	105	Armadillo	-1.04472	chr19.6
chr3	44540715	44544154	ZNF852	-	protein_coding	159	Tasmanian devil	1.05809	chr3.2
chr1	50307842	50312063	ZNF859P	+	unprocessed_pseudogene	6.7	Chimpanzee	NA	noCluster
chr3	32030640	32032503	ZNF860	+	protein_coding	29.4	Black snub-nosed monkey	-1.02025	noCluster
chr19	15932663	15934610	ZNF861P	-	unprocessed_pseudogene	76	Malayan flying lemur	NA	noCluster
chr19	37838097	37854752	ZNF875	+	protein_coding	NA	NA	NA	noCluster
chr4	212446	248619	ZNF876P	+	transcribed_unprocessed_pseudogene	29.4	Sooty mangabey	NA	chr4.1
chr19	12154628	12157569	ZNF878	-	protein_coding	76	Malayan flying lemur	-0.607339	chr19.3
chr5	178454479	178460635	ZNF879	+	protein_coding	105	Manatee	-1.09648	chr5.2
chr19	52876369	52888627	ZNF880	+	protein_coding	43.2	Nancy Ma's night monkey	0.580587	chr19.9
chr19	11759178	11763684	ZNF887P	+	transcribed_unprocessed_pseudogene	NA	NA	NA	chr19.3
chr19	53409022	53418569	ZNF888	-	protein_coding	NA	NA	NA	chr19.9
chr7	5160893	5167368	ZNF890P	-	transcribed_unprocessed_pseudogene	0	human-specific	NA	noCluster
chr12	133696890	133698378	ZNF891	-	protein_coding	105	Elephant	NA	chr12.1
chr19	20215053	20230956	ZNF90	+	protein_coding	9.1	Gorilla	0.906684	chr19.4
chr3	101076124	101077332	ZNF90P1	+	processed_pseudogene	9.1	Gorilla	NA	noCluster
chr19	23541517	23557560	ZNF91	-	protein_coding	NA	NA	-0.209908	chr19.4
chr19	23494122	23525689	ZNF91_alt	-	NA	NA	NA	NA	chr19.4
chr7	64852820	64865365	ZNF92	+	protein_coding	43.2	Bolivian squirrel monkey	-0.359589	noCluster
chr19	20026094	20045681	ZNF93	+	protein_coding	9.1	Gorilla	0.868833	chr19.4
chr13	19041311	19059578	ZNF962P	-	unprocessed_pseudogene	20.2	Gibbon	NA	noCluster
chr4	111337415	111339660	ZNF969P	+	processed_pseudogene	6.7	Chimpanzee(v4)	NA	noCluster
chr19	22574416	22586308	ZNF98	-	protein_coding	43.2	Nancy Ma's night monkey	0.161319	chr19.4
chr19	22937227	22952120	ZNF99	-	protein_coding	29.4	African Green Monkey	0.820168	chr19.4
