# Supplementary material for: Genetic features and genomic targets of human KRAB-zinc finger proteins
Source: Genome Res. 2023 Aug;33(8):1409–23. doi: 10.1101/gr.277722.123 (PMC10547255; doi:10.1101/gr.277722.123)
Supplement: Supplement 4 [file Supplemental_Table_S4.xlsx]

## Sheet: Explanations
Table S4: KZFP and TE age comparison
Data underlying Figure 5C, each tab showing the data for one panel.
Column	Explanation
KZFP	KRAB-Zinc Finger protein name
TE_target_subfam	Subfamily of the TE target. Excluding subfamilies with enrichments based on only one peak or with less than 15 repeats in the human genome
n merge	Number of replicates whose p-values were merged
minus_log10_padj	negative log10 transform of merged padj.final
weight	Normalization of minus_log10_padj by the max for each KZFP
Subfam_age	Age of the TE subfamily in mio. years
KZFP age	Age of the KZFP in mio. years
TE family	Family of the TE subfamily
KRAB_type_Helleboid_2019	Highlighting standard (sk) and variant (vk) KRAB domains. Vk are thought to not interact with KAP1. As defined by Helleboid et al. 2019
KRAB_type_Tycko_2020	Highlighting repressor (REP) and activator (ACT) KRAB domains as defined by Tycko et al. 2020

## Sheet: LINE_L2
KZFP	TE_target_subfam	n_merge	merged_padj.final	minus_log10_padj	weight	Subfam_age	KZFP_age	TE_family	KRAB_type_Helleboid_2019	KRAB_type_Tycko_2020
PRDM9	L2b	1	1.27e-12	11.8962	0.0590047	163.7	0	LINE/L2	vk	#N/A
ZNF723	L2	1	1.17e-11	10.9318	0.0896266	179.2	15.8	LINE/L2	sk	REP
ZNF479	L2	1	0.00263	2.58004	0.00836985	179.2	20.2	LINE/L2	sk	#N/A
ZNF257	L2a	3	5.60667e-37	36.2513	0.331486	163.7	29.4	LINE/L2	sk	REP
ZNF440	L2	1	0.000774	3.11126	0.0100931	179.2	29.4	LINE/L2	sk	REP
ZNF493	L2a	1	0.000373	3.42829	0.0167271	163.7	29.4	LINE/L2	sk	#N/A
ZNF680	L2c	4	1.70143e-32	31.7692	0.0998384	179.2	43.2	LINE/L2	sk	REP
ZNF716	L2b	1	0.0191	1.71897	0.449531	163.7	43.2	LINE/L2	sk	REP
ZNF528	L2c	4	0.0299586	1.52348	0.00494227	179.2	43.2	LINE/L2	sk	REP
ZNF823	L2	1	1.26e-118	117.9	0.382475	179.2	76	LINE/L2	sk	REP
ZNF77	L2a	1	3.25e-06	5.48812	0.16174	163.7	76	LINE/L2	sk	REP
ZNF534	L2a	1	1.85e-15	14.7328	0.0477943	163.7	96	LINE/L2	sk	REP
ZNF792	L2	2	0.00106696	2.97185	0.0106436	179.2	96	LINE/L2	sk	REP
ZNF334	L2b	2	0.00522872	2.2816	0.00753121	163.7	105	LINE/L2	sk	REP
ZNF585A	L2a	1	0.0141	1.85078	0.0495114	163.7	105	LINE/L2	sk	REP
ZNF606	L2c	1	9.38e-11	10.0278	0.229542	179.2	105	LINE/L2	sk	REP
ZNF140	L2b	2	0.0133653	1.87402	0.00694881	163.7	105	LINE/L2	sk	REP
ZNF224	L2	2	0.00590115	2.22906	0.0069139	179.2	105	LINE/L2	sk	REP
ZNF300	L2a	1	2.99e-30	29.5243	0.752237	163.7	105	LINE/L2	sk	REP
ZFP69B	L2a	1	1.12e-45	44.9508	0.356442	163.7	105	LINE/L2	sk	#N/A
ZNF317	L2	3	1.91463e-25	24.7179	0.0781206	179.2	105	LINE/L2	sk	REP
ZNF134	L2b	1	4.52e-07	6.34486	0.0205832	163.7	105	LINE/L2	sk	#N/A
ZNF667	L2b	2	3.10386e-07	6.5081	0.678955	163.7	105	LINE/L2	sk	REP
ZNF41	L2a	3	1.14288e-35	34.942	0.240036	163.7	105	LINE/L2	sk	#N/A
ZNF677	L2a	2	6.50467e-126	125.187	1	163.7	105	LINE/L2	sk	REP
ZNF485	L2	1	1.33e-10	9.87615	0.0320389	179.2	105	LINE/L2	sk	REP
ZNF671	L2	1	7.59e-15	14.1198	0.200152	179.2	105	LINE/L2	sk	#N/A
ZNF582	L2b	3	0.0107016	1.97055	0.00983401	163.7	105	LINE/L2	sk	REP
ZNF250	L2b	3	2.05301e-16	15.6876	0.0508917	163.7	105	LINE/L2	sk	REP
ZNF184	L2c	2	0.00010517	3.97811	0.219732	179.2	105	LINE/L2	sk	REP
ZNF33A	L2b	3	2.7031e-06	5.56814	0.0179557	163.7	105	LINE/L2	sk	REP
ZNF175	L2a	2	1.56604e-44	43.8052	1	163.7	105	LINE/L2	sk	REP
ZNF454	L2c	2	3.29382e-05	4.4823	0.311241	179.2	105	LINE/L2	sk	REP
ZNF26	L2a	1	1.85e-12	11.7328	0.0380621	163.7	105	LINE/L2	vk	#N/A
ZNF662	L2a	1	5.63e-11	10.2495	1	163.7	105	LINE/L2	sk	#N/A
ZNF189	L2a	2	0	308.255	1	163.7	105	LINE/L2	sk	#N/A
ZNF214	L2b	2	8.90894e-06	5.05017	1	163.7	105	LINE/L2	sk	REP
ZNF436	L2b	2	0	308.255	1	163.7	159	LINE/L2	sk	#N/A
ZNF3	L2b	3	1.40954e-79	78.8509	1	163.7	159	LINE/L2	sk	#N/A
ZNF263	L2b	8	3.69411e-20	19.4325	0.0709896	163.7	159	LINE/L2	vk	#N/A
ZNF205	L2a	1	3.21e-17	16.4935	1	163.7	159	LINE/L2	sk	#N/A
ZKSCAN5	L2a	1	5.29e-53	52.2765	1	163.7	159	LINE/L2	vk	#N/A
ZKSCAN8	L2b	2	2.00411e-23	22.6981	0.853844	163.7	159	LINE/L2	vk	#N/A
ZKSCAN1	L2b	2	4.1651e-121	120.38	1	163.7	159	LINE/L2	vk	#N/A
ZNF705A	L2b	1	4.31e-23	22.3655	0.0725553	163.7	312	LINE/L2	sk	REP
ZNF777	L2a	3	2.47498e-11	10.6064	1	163.7	312.1	LINE/L2	vk	#N/A

## Sheet: DNA_transposons
KZFP	TE_target_subfam	n_merge	merged_padj.final	minus_log10_padj	weight	Subfam_age	KZFP_age	TE_family	KRAB_type_Helleboid_2019	KRAB_type_Tycko_2020
PRDM9	MER5A	1	1.92e-27	26.7167	0.132514	105	0	DNA/hAT-Charlie	vk	#N/A
ZNF723	MER58A	1	1.04e-66	65.983	0.540974	105	15.8	DNA/hAT-Charlie	sk	REP
ZNF765	MER1B	1	5.68e-05	4.24565	0.0137732	43.1	15.8	DNA/hAT-Charlie	sk	#N/A
ZNF479	Tigger1	1	3.01e-229	228.521	0.74134	159	20.2	DNA/TcMar-Tigger	sk	#N/A
ZNF440	HSMAR2	1	2.48e-07	6.60555	0.0214289	75.9	29.4	DNA/TcMar-Mariner	sk	REP
ZNF701	MER96	2	6.24028e-42	41.2048	0.176339	105	29.4	DNA/hAT	sk	#N/A
ZNF85	Tigger1	2	3.00052e-12	11.5228	0.0627605	159	29.4	DNA/TcMar-Tigger	sk	REP
ZNF616	MER6	1	0.0426	1.37059	0.0188937	75.9	43.2	DNA/TcMar-Tigger	sk	#N/A
ZNF101	MER20	1	0.018	1.74473	0.0671703	105	43.2	DNA/hAT-Charlie	sk	REP
ZNF610	MER1A	1	0	308.255	1	43.1	43.2	DNA/hAT-Charlie	sk	REP
ZNF736	MER5A1	1	0.000333	3.47756	0.0108277	105	43.2	DNA/hAT-Charlie	sk	REP
ZNF680	MER81	4	1.38686e-07	6.85797	0.021552	105	43.2	DNA/hAT-Blackjack	sk	REP
ZNF716	MER44C	1	0.0184	1.73518	0.453772	75.9	43.2	DNA/TcMar-Tigger	sk	REP
ZNF766	Tigger1	1	1.16e-31	30.9355	0.100357	159	43.2	DNA/TcMar-Tigger	sk	REP
ZNF528	MER1B	4	0.00541662	2.26627	0.00735194	43.1	43.2	DNA/hAT-Charlie	sk	REP
ZNF627	Tigger1	1	0	308.255	1	159	74	DNA/TcMar-Tigger	sk	REP
ZNF823	Tigger1	1	0.000886	3.05257	0.00990274	159	76	DNA/TcMar-Tigger	sk	REP
ZNF320	MER1A	3	0	308.255	1	43.1	76	DNA/hAT-Charlie	sk	#N/A
ZNF563	MER1B	2	0.000144564	3.83994	0.0503663	43.1	76	DNA/hAT-Charlie	sk	REP
ZNF799	MER20	1	0.0345	1.46218	0.00535597	105	76	DNA/hAT-Charlie	sk	REP
ZNF37A	Charlie3	2	0.00144429	2.84035	0.00921428	43.1	96	DNA/hAT-Charlie	sk	REP
ZNF549	MER1B	3	0	310.706	1	43.1	96	DNA/hAT-Charlie	sk	REP
ZIM3	MER75	2	5.05845e-106	105.296	0.341588	43.1	96	DNA/PiggyBac	sk	REP
ZNF534	MER115	1	0.0167	1.77728	0.00576563	105	96	DNA/hAT-Tip100	sk	REP
ZNF169	Tigger2b_Pri	2	0.0137425	1.86193	0.0139798	75.9	96	DNA/TcMar-Tigger	sk	REP
ZIK1	MADE1	1	1.99e-31	30.7011	1	43.1	96	DNA/TcMar-Mariner	sk	REP
ZNF211	Tigger3a	2	9.08046e-05	4.04189	0.0133424	75.9	96	DNA/TcMar-Tigger	sk	REP
ZNF334	MER1B	2	2.80428e-06	5.55218	0.0183269	43.1	105	DNA/hAT-Charlie	sk	REP
ZNF287	MER30	1	0.0132	1.87943	0.049039	43.1	105	DNA/hAT-Charlie	sk	#N/A
ZNF554	Tigger3a	3	1.71912e-12	11.7647	0.150031	75.9	105	DNA/TcMar-Tigger	sk	REP
ZNF222	MER20	1	6.52e-06	5.18575	0.239265	105	105	DNA/hAT-Charlie	sk	REP
ZNF606	Tigger1	1	0.000291	3.53611	0.0809435	159	105	DNA/TcMar-Tigger	sk	REP
ZNF140	MER1B	2	0.000543193	3.26505	0.0121067	43.1	105	DNA/hAT-Charlie	sk	REP
ZNF300	Charlie1a	1	5.8e-28	27.2366	0.693948	105	105	DNA/hAT-Charlie	sk	REP
ZNF283	MER1B	1	0.00381	2.41908	0.00784765	43.1	105	DNA/hAT-Charlie	sk	REP
ZNF605	MER1B	1	0.00273	2.56384	0.0134624	43.1	105	DNA/hAT-Charlie	sk	REP
ZNF382	MER1B	7	1.60938e-46	45.7933	0.148557	43.1	105	DNA/hAT-Charlie	sk	REP
ZNF445	MER8	1	1.34e-13	12.8729	0.316051	75.9	105	DNA/TcMar-Tigger	sk	REP
ZFP57	MER1B	3	1.32412e-44	43.8781	0.135717	43.1	105	DNA/hAT-Charlie	sk	REP
ZFP69B	MER6	1	0.000803	3.09528	0.0245444	75.9	105	DNA/TcMar-Tigger	sk	#N/A
ZNF394	MER33	2	0.00295938	2.5288	0.0632564	105	105	DNA/hAT-Charlie	vk	#N/A
ZNF317	Tigger3a	3	4.77484e-30	29.321	0.0926687	75.9	105	DNA/TcMar-Tigger	sk	REP
ZNF324	Tigger2	2	2.75373e-186	185.56	1	75.9	105	DNA/TcMar-Tigger	sk	#N/A
ZNF597	MER81	2	0.000108558	3.96434	0.24159	105	105	DNA/hAT-Blackjack	vk	ACT
ZNF793	Tigger4b	2	1.9687e-05	4.70582	0.015266	75.9	105	DNA/TcMar-Tigger	sk	REP
ZNF667	MER5B	2	0.000796103	3.09903	0.323305	105	105	DNA/hAT-Charlie	sk	REP
ZNF510	Cheshire	1	1.84e-128	127.735	1	105	105	DNA/hAT-Charlie	sk	REP
ZNF133	MER8	1	1.55e-53	52.8097	0.258378	75.9	105	DNA/TcMar-Tigger	sk	#N/A
ZNF41	Tigger3a	3	0.00948244	2.02308	0.0138977	75.9	105	DNA/TcMar-Tigger	sk	#N/A
ZNF707	MER96	1	0.000535	3.27165	0.0106135	105	105	DNA/hAT	sk	#N/A
ZNF669	HSMAR2	2	0.0495491	1.30496	0.0042334	75.9	105	DNA/TcMar-Mariner	sk	REP
ZNF547	Tigger4	2	6.9923e-267	266.155	1	75.9	105	DNA/TcMar-Tigger	sk	#N/A
ZNF485	MER20	1	1.06e-241	240.975	0.781739	105	105	DNA/hAT-Charlie	sk	REP
ZNF585B	HSMAR2	1	6.32e-249	248.199	1	75.9	105	DNA/TcMar-Mariner	sk	REP
ZNF230	MER20	1	0.00503	2.29843	0.0726771	105	105	DNA/hAT-Charlie	sk	REP
ZNF350	MADE1	2	0.000113627	3.94452	0.0127846	43.1	105	DNA/TcMar-Mariner	sk	REP
ZNF33A	MER1B	3	0.00031337	3.50394	0.0112992	43.1	105	DNA/hAT-Charlie	sk	REP
ZNF248	Tigger3c	1	0.000309	3.51004	0.0113868	75.9	105	DNA/TcMar-Tigger	sk	REP
ZNF175	Tigger1	2	0.00747054	2.12665	0.0485478	159	105	DNA/TcMar-Tigger	sk	REP
ZNF558	MER2	1	0.00663	2.17849	0.0314857	75.9	105	DNA/TcMar-Tigger	sk	#N/A
ZNF34	Tigger1	2	3.29687e-74	73.4819	1	159	105	DNA/TcMar-Tigger	sk	REP
ZNF483	Tigger5	1	0.017	1.76955	0.55119	82	105	DNA/TcMar-Tigger	sk	#N/A
ZNF12	Tigger3a	3	0.000100247	3.99893	0.0129728	75.9	105	DNA/TcMar-Tigger	sk	REP
ZNF180	MER102c	1	0	308.255	1	105	105	DNA/hAT-Charlie	sk	#N/A
ZNF23	MER117	1	9.02e-201	200.045	1	105	105	DNA/hAT-Charlie	sk	#N/A
ZNF285	MER63A	1	8.69e-75	74.061	1	105	105	DNA/hAT-Tip100	sk	REP
ZNF324B	Tigger2	1	2.71e-29	28.567	1	75.9	105	DNA/TcMar-Tigger	sk	REP
ZNF599	Tigger6a	1	1.23e-85	84.9101	1	105	105	DNA/TcMar-Tigger	sk	REP
ZNF436	MER1B	2	0.000618914	3.20837	0.0104082	43.1	159	DNA/hAT-Charlie	sk	#N/A
ZKSCAN5	MER1B	1	1.03e-24	23.9872	0.458851	43.1	159	DNA/hAT-Charlie	vk	#N/A
ZNF2	Tigger16a	1	1.22e-14	13.9136	0.140079	163.7	159	DNA/TcMar-Tigger	sk	REP
ZKSCAN1	Tigger7	2	0.000436956	3.35956	0.0279079	75.9	159	DNA/TcMar-Tigger	vk	#N/A
ZKSCAN4	MER53	1	1.6e-06	5.79588	1	105	159	DNA/hAT-Blackjack	vk	#N/A
ZKSCAN3	Tigger16a	1	0.012	1.92082	1	163.7	159	DNA/TcMar-Tigger	vk	#N/A
ZNF18	MER1B	4	5.93739e-06	5.2264	0.0169548	43.1	312	DNA/hAT-Charlie	vk	#N/A
ZNF75D	MER20	2	9.0704e-17	16.0424	0.0646014	105	312	DNA/hAT-Charlie	vk	REP

## Sheet: LTR_ERVL
KZFP	TE_target_subfam	n_merge	merged_padj.final	minus_log10_padj	weight	Subfam_age	KZFP_age	TE_family	KRAB_type_Helleboid_2019	KRAB_type_Tycko_2020
PRDM9	LTR16A	1	6.57e-13	12.1824	0.0604244	105	0	LTR/ERVL	vk	#N/A
ZNF90	LTR33	1	0.0229	1.64016	0.00966658	105	9.1	LTR/ERVL	sk	REP
ZNF723	HERVL-int	1	9.62e-94	93.0168	0.762617	75.9	15.8	LTR/ERVL	sk	REP
ZNF479	MER68	1	1.02e-73	72.9914	0.236789	105	20.2	LTR/ERVL	sk	#N/A
ZNF429	LTR18A	1	3.7e-11	10.4318	0.0731505	43.1	29.4	LTR/ERVL	sk	REP
ZNF257	LTR16A1	3	2.26335e-07	6.64525	0.060765	105	29.4	LTR/ERVL	sk	REP
ZNF440	LTR18A	1	0.00015	3.82391	0.012405	43.1	29.4	LTR/ERVL	sk	REP
ZNF600	LTR41	1	3.52e-05	4.45346	0.0225839	105	29.4	LTR/ERVL	sk	#N/A
ZNF701	LTR18A	2	7.16295e-09	8.14491	0.0348568	43.1	29.4	LTR/ERVL	sk	#N/A
ZNF808	MER74B	1	1.64e-05	4.78516	0.0155234	105	29.4	LTR/ERVL	sk	#N/A
ZNF530	MER21B	1	0.00883	2.05404	0.0126153	105	29.4	LTR/ERVL	sk	REP
ZNF506	LTR55	1	0.00393	2.40561	0.0118835	105	43.2	LTR/ERVL?	sk	#N/A
ZNF736	MER21C	1	0.000844	3.07366	0.00957011	105	43.2	LTR/ERVL	sk	REP
ZNF680	MER21A	4	2.00316e-185	184.698	0.580436	75.9	43.2	LTR/ERVL	sk	REP
ZNF708	LTR18A	2	8.5447e-05	4.0683	0.0372105	43.1	43.2	LTR/ERVL	sk	#N/A
ZNF595	LTR18A	1	8.49e-09	8.07109	0.140848	43.1	43.2	LTR/ERVL	sk	#N/A
ZNF141	MER21B	1	2.94e-05	4.53165	0.0352701	105	43.2	LTR/ERVL	sk	REP
ZNF766	LTR52	1	0.0118	1.92812	0.00625495	105	43.2	LTR/ERVL	sk	REP
ZNF17	MLT2B4	1	0	308.255	1	105	43.2	LTR/ERVL	sk	REP
ZNF679	LTR16C	1	2.8e-05	4.55284	0.0147697	105	43.2	LTR/ERVL	sk	#N/A
ZNF559	LTR41	1	2.6e-60	59.585	1	105	43.2	LTR/ERVL	sk	REP
ZNF490	MER54B	2	8.98536e-10	9.04646	0.0286494	90.9	43.2	LTR/ERVL	sk	REP
ZNF528	LTR18A	4	1.03311e-19	18.9859	0.0615914	43.1	43.2	LTR/ERVL	sk	REP
ZNF254	MLT2A1	1	0	308.255	1	75.9	43.2	LTR/ERVL	sk	REP
ZNF682	LTR41B	2	6.63843e-05	4.17793	0.0135535	105	43.2	LTR/ERVL	sk	REP
ZNF273	MLT2B4	1	1.63e-06	5.78781	0.0187761	105	43.2	LTR/ERVL	sk	#N/A
ZNF431	LTR33B	1	1.93e-33	32.7144	1	105	43.2	LTR/ERVL	sk	REP
ZNF136	LTR18A	3	3.93885e-07	6.40463	0.0207771	43.1	74	LTR/ERVL	sk	REP
ZNF778	LTR41	2	0.0351535	1.45403	0.00471698	105	74	LTR/ERVL	sk	REP
ZNF587	LTR18A	2	0.0334909	1.47507	0.0399061	43.1	74	LTR/ERVL	sk	#N/A
ZNF780B	LTR50	1	1.55e-05	4.80967	0.0156029	105	74	LTR/ERVL	sk	REP
ZNF823	LTR33	1	4.94e-10	9.30627	0.0301902	105	76	LTR/ERVL	sk	REP
ZNF320	LTR18A	3	3.50552e-55	54.4552	0.176657	43.1	76	LTR/ERVL	sk	#N/A
ZNF28	HERVL18-int	1	3.25e-08	7.48812	0.0543632	43.1	76	LTR/ERVL	sk	#N/A
ZNF563	LTR62	2	1.51575e-22	21.8194	0.286193	75.9	76	LTR/ERVL	sk	REP
ZNF878	LTR41	1	0.0371	1.43063	0.0804273	105	76	LTR/ERVL	sk	REP
ZNF564	MLT2D	1	1.89e-11	10.7235	0.0347879	105	76	LTR/ERVL	sk	REP
ZNF266	MER74A	2	4.88877e-161	160.311	1	105	90	LTR/ERVL	sk	#N/A
ZNF573	LTR41	1	2.14e-73	72.6696	1	105	96	LTR/ERVL	sk	REP
ZNF30	LTR18A	5	2.71144e-32	31.5668	0.102405	43.1	96	LTR/ERVL	sk	REP
ZNF596	LTR55	1	0.0161	1.79317	0.431709	105	96	LTR/ERVL?	sk	REP
ZNF37A	LTR16C	2	0	308.255	1	105	96	LTR/ERVL	sk	REP
ZNF549	LTR18A	3	1.90866e-80	79.7193	0.256575	43.1	96	LTR/ERVL	sk	REP
ZIM3	MER70A	2	1.43244e-58	57.8439	0.18765	90.9	96	LTR/ERVL	sk	REP
ZNF534	MER74A	1	2.93e-14	13.5331	0.0439024	105	96	LTR/ERVL	sk	REP
ZNF425	LTR55	1	2.59e-35	34.5867	0.341728	105	96	LTR/ERVL?	vk	REP
ZNF792	LTR18B	2	0.00319079	2.4961	0.00893972	43.1	96	LTR/ERVL	sk	REP
ZNF586	LTR18A	2	1.81353e-20	19.7415	0.0640427	43.1	96	LTR/ERVL	sk	REP
ZNF334	LTR16C	2	5.30587e-07	6.27524	0.0207136	105	105	LTR/ERVL	sk	REP
ZNF554	LTR18A	3	3.92548e-64	63.4061	0.808596	43.1	105	LTR/ERVL	sk	REP
ZNF222	LTR18A	1	2.12e-22	21.6737	1	43.1	105	LTR/ERVL	sk	REP
ZNF606	HERVL-int	1	8.14e-05	4.08938	0.0936081	75.9	105	LTR/ERVL	sk	REP
ZNF140	LTR18A	2	8.19761e-16	15.0863	0.0559396	43.1	105	LTR/ERVL	sk	REP
ZNF224	MER70A	2	0	322.403	1	90.9	105	LTR/ERVL	sk	REP
ZNF283	LTR16A1	1	0.000118	3.92812	0.0127431	105	105	LTR/ERVL	sk	REP
ZNF382	LTR18A	7	1.65231e-45	44.7819	0.145276	43.1	105	LTR/ERVL	sk	REP
ZNF461	LTR16A	1	8.52e-06	5.06956	0.0183992	105	105	LTR/ERVL	sk	REP
ZFP57	HERVL18-int	3	0.0479675	1.31905	0.00407989	43.1	105	LTR/ERVL	sk	REP
ZNF264	LTR18A	2	9.25232e-08	7.03375	0.022818	43.1	105	LTR/ERVL	sk	REP
ZNF251	LTR32	1	0	308.255	1	43.1	105	LTR/ERVL	sk	REP
ZFP69B	LTR18A	1	9.08e-48	47.0419	0.373024	43.1	105	LTR/ERVL	sk	#N/A
ZNF317	LTR18A	3	6.80892e-15	14.1669	0.0447743	43.1	105	LTR/ERVL	sk	REP
ZNF324	LTR18A	2	2.70967e-57	56.5671	0.304845	43.1	105	LTR/ERVL	sk	#N/A
ZNF134	MLT2D	1	0	308.255	1	105	105	LTR/ERVL	sk	#N/A
ZNF597	MER74A	2	6.95033e-08	7.15799	0.436214	105	105	LTR/ERVL	vk	ACT
ZNF793	MLT2A1	2	1.3629e-72	71.8655	0.233137	75.9	105	LTR/ERVL	sk	REP
ZNF667	LTR41	2	0.000942374	3.02578	0.315663	105	105	LTR/ERVL	sk	REP
ZNF684	LTR41	1	9.25e-07	6.03386	0.22633	105	105	LTR/ERVL	sk	REP
ZFP1	MER77	2	4.60859e-07	6.33643	0.164861	105	105	LTR/ERVL	sk	REP
ZNF41	LTR18A	3	0.0153664	1.81343	0.0124574	43.1	105	LTR/ERVL	sk	#N/A
ZNF677	LTR50	2	1.57992e-09	8.80136	0.0703059	105	105	LTR/ERVL	sk	REP
ZNF707	HERVL-int	1	1.76e-09	8.75449	0.0284002	75.9	105	LTR/ERVL	sk	#N/A
ZNF669	LTR18A	2	1.5409e-31	30.8122	0.099957	43.1	105	LTR/ERVL	sk	REP
ZNF418	LTR18A	2	0.022441	1.64896	0.00534934	43.1	105	LTR/ERVL	sk	REP
ZFP69	MER21-int	1	0.000345	3.46218	0.078569	105	105	LTR/ERVL	sk	REP
ZNF790	LTR33	1	4.82e-35	34.317	1	105	105	LTR/ERVL	sk	#N/A
ZNF547	LTR18A	2	1.34407e-57	56.8716	0.213678	43.1	105	LTR/ERVL	sk	#N/A
ZNF419	LTR18A	3	3.47093e-09	8.45955	0.0326217	43.1	105	LTR/ERVL	sk	REP
ZNF485	HERVL-int	1	0	308.255	1	75.9	105	LTR/ERVL	sk	REP
ZNF671	HERVL-int	1	2.85e-71	70.5452	1	75.9	105	LTR/ERVL	sk	#N/A
ZNF582	HERVL-int	3	0.000253508	3.59601	0.0179458	75.9	105	LTR/ERVL	sk	REP
ZNF157	HERVL-int	1	0	308.255	1	75.9	105	LTR/ERVL	sk	REP
ZNF302	HERVL-int	1	0	308.255	1	75.9	105	LTR/ERVL	sk	REP
ZNF230	LTR41	1	1.83e-20	19.7375	0.624107	105	105	LTR/ERVL	sk	REP
ZNF350	LTR18A	2	0.000236809	3.6256	0.011751	43.1	105	LTR/ERVL	sk	REP
ZNF184	LTR18A	2	5.02767e-07	6.29863	0.347906	43.1	105	LTR/ERVL	sk	REP
ZNF8	LTR18A	2	6.96199e-17	16.1573	0.0524153	43.1	105	LTR/ERVL	sk	REP
ZNF33A	LTR18A	3	5.56125e-07	6.25483	0.0201701	43.1	105	LTR/ERVL	sk	REP
ZNF7	MLT2A2	2	1.44788e-29	28.8393	0.160064	75.9	105	LTR/ERVL	sk	REP
ZNF567	LTR16C	1	1.58e-11	10.8013	0.0489125	105	105	LTR/ERVL	sk	REP
ZNF615	MER68B	1	1.35e-09	8.86967	0.116973	105	105	LTR/ERVL	sk	REP
ZNF613	LTR40c	1	7.96e-13	12.0991	1	105	105	LTR/ERVL	sk	REP
ZFP82	LTR18A	2	4.06569e-08	7.39087	0.0452307	43.1	105	LTR/ERVL	sk	REP
ZNF331	LTR18A	4	2.29381e-20	19.6394	0.0637117	43.1	105	LTR/ERVL	sk	REP
ZNF34	LTR18A	2	1.50301e-11	10.823	0.147288	43.1	105	LTR/ERVL	sk	REP
ZNF189	LTR41	2	0.0167568	1.77581	0.00576085	105	105	LTR/ERVL	sk	#N/A
ZNF891	LTR33B	1	2.07e-29	28.684	1	105	105	LTR/ERVL	sk	REP
ZNF132	LTR16B1	1	5.14e-116	115.289	1	105	105	LTR/ERVL	sk	REP
ZNF483	LTR67B	1	0.000616	3.21042	1	105	105	LTR/ERVL	sk	#N/A
ZNF12	LTR18B	3	5.97028e-06	5.22401	0.016947	43.1	105	LTR/ERVL	sk	REP
ZNF33B	LTR33A	1	1.4e-109	108.854	1	105	105	LTR/ERVL	sk	#N/A
ZNF514	LTR40a	1	1.9e-28	27.7212	1	105	105	LTR/ERVL	sk	#N/A
ZNF699	LTR41	1	5.65e-10	9.24795	1	105	105	LTR/ERVL	sk	REP
ZNF566	LTR67B	1	5.17e-100	99.2865	0.437131	105	105	LTR/ERVL	sk	#N/A
ZNF786	MER21C	1	5.23e-10	9.2815	0.0910065	105	159	LTR/ERVL	vk	REP
ZNF263	LTR16A	8	0.00991777	2.00359	0.00731938	105	159	LTR/ERVL	vk	#N/A
ZKSCAN8	LTR18B	2	1.17705e-06	5.92921	0.223042	43.1	159	LTR/ERVL	vk	#N/A
ZKSCAN1	LTR41B	2	3.87283e-05	4.41197	0.0366503	105	159	LTR/ERVL	vk	#N/A
ZNF789	MER77B	1	8.5e-47	46.0706	1	105	159	LTR/ERVL	sk	REP
ZNF18	LTR53	4	0.0141488	1.84928	0.00599919	105	312	LTR/ERVL	vk	#N/A
ZNF705D	LTR16B2	1	0.00274	2.56225	0.00831212	105	312	LTR/ERVL	sk	#N/A
ZNF705A	LTR33	1	6.02e-42	41.2204	0.133722	105	312	LTR/ERVL	sk	REP
ZNF75D	MER21B	2	2.5969e-09	8.58555	0.0345733	105	312	LTR/ERVL	vk	REP
ZNF705B	LTR16B2	1	1.32e-08	7.87943	0.0255614	105	312	LTR/ERVL	sk	#N/A

## Sheet: LTR_ERVL-MaLR
KZFP	TE_target_subfam	n_merge	merged_padj.final	minus_log10_padj	weight	Subfam_age	KZFP_age	TE_family	KRAB_type_Helleboid_2019	KRAB_type_Tycko_2020
PRDM9	THE1B	1	2.43e-202	201.614	1	43.1	0	LTR/ERVL-MaLR	vk	#N/A
ZNF723	THE1B	1	0.000904	3.04383	0.0249554	43.1	15.8	LTR/ERVL-MaLR	sk	REP
ZNF765	THE1B-int	1	1.55e-258	257.81	0.836353	43.1	15.8	LTR/ERVL-MaLR	sk	#N/A
ZNF479	MLT1G	1	6.49e-38	37.1878	0.12064	105	20.2	LTR/ERVL-MaLR	sk	#N/A
ZNF257	MLT1C	3	4.70827e-12	11.3271	0.103577	105	29.4	LTR/ERVL-MaLR	sk	REP
ZNF675	MSTA-int	1	0	308.255	1	43.1	29.4	LTR/ERVL-MaLR	sk	REP
ZNF701	MLT1J	2	2.14865e-234	233.668	1	105	29.4	LTR/ERVL-MaLR	sk	#N/A
ZNF730	MLT1A0	1	3.25e-11	10.4881	0.0340242	105	29.4	LTR/ERVL-MaLR	sk	REP
ZNF530	THE1C-int	1	0.000111	3.95468	0.0242885	43.1	29.4	LTR/ERVL-MaLR	sk	REP
ZNF506	THE1B-int	1	9.55e-167	166.02	0.820128	43.1	43.2	LTR/ERVL-MaLR	sk	#N/A
ZNF695	MSTB2	1	0.00262	2.5817	0.0366516	75.9	43.2	LTR/ERVL-MaLR	sk	REP
ZNF736	MLT1J1	1	3.2e-28	27.4949	0.0856077	105	43.2	LTR/ERVL-MaLR	sk	REP
ZNF680	MSTA-int	4	2.43472e-09	8.61355	0.0270691	43.1	43.2	LTR/ERVL-MaLR	sk	REP
ZNF708	THE1B-int	2	3.98726e-12	11.3993	0.104263	43.1	43.2	LTR/ERVL-MaLR	sk	#N/A
ZNF141	MSTA	1	0.0101	1.99568	0.0155325	43.1	43.2	LTR/ERVL-MaLR	sk	REP
ZNF100	THE1A	3	0	308.255	1	43.1	43.2	LTR/ERVL-MaLR	sk	REP
ZNF766	MSTA	1	0	308.255	1	43.1	43.2	LTR/ERVL-MaLR	sk	REP
ZNF679	MSTA	1	0	308.255	1	43.1	43.2	LTR/ERVL-MaLR	sk	#N/A
ZNF490	MSTB	2	1.39693e-27	26.8548	0.0850471	43.1	43.2	LTR/ERVL-MaLR	sk	REP
ZNF480	MLT1K	1	7.75e-06	5.1107	0.0165795	105	43.2	LTR/ERVL-MaLR	sk	REP
ZNF682	THE1B-int	2	3.40664e-05	4.46767	0.0144934	43.1	43.2	LTR/ERVL-MaLR	sk	REP
ZNF267	THE1C	1	0	308.255	1	43.1	43.2	LTR/ERVL-MaLR	sk	#N/A
ZNF836	MSTA-int	1	4.92e-180	179.308	1	43.1	43.2	LTR/ERVL-MaLR	sk	#N/A
ZNF841	MSTA-int	1	8.58e-92	91.0665	1	43.1	43.2	LTR/ERVL-MaLR	sk	#N/A
ZNF92	MSTA-int	1	4.36e-101	100.361	1	43.1	43.2	LTR/ERVL-MaLR	sk	REP
ZNF430	THE1B	1	0	308.255	1	43.1	43.2	LTR/ERVL-MaLR	sk	#N/A
ZNF778	MSTC	2	0	308.255	1	75.9	74	LTR/ERVL-MaLR	sk	REP
ZNF823	THE1B	1	8.47e-10	9.07212	0.0294306	43.1	76	LTR/ERVL-MaLR	sk	REP
ZNF320	MSTB	3	1.34096e-189	188.873	0.612716	43.1	76	LTR/ERVL-MaLR	sk	#N/A
ZNF28	MSTA	1	5.58e-87	86.2534	0.626194	43.1	76	LTR/ERVL-MaLR	sk	#N/A
ZNF468	THE1B-int	1	3.03e-08	7.51856	0.0243907	43.1	76	LTR/ERVL-MaLR	sk	#N/A
ZNF564	MSTD	1	0	308.255	1	75.9	76	LTR/ERVL-MaLR	sk	REP
ZNF266	MLT1A0	2	4.79083e-88	87.3196	0.544689	105	90	LTR/ERVL-MaLR	sk	#N/A
ZNF573	MLT1C	1	4.12e-45	44.3851	0.61078	105	96	LTR/ERVL-MaLR	sk	REP
ZNF30	MLT1E2	5	0	308.255	1	105	96	LTR/ERVL-MaLR	sk	REP
ZNF596	MLT1A	1	7.02e-05	4.15366	1	105	96	LTR/ERVL-MaLR	sk	REP
ZNF549	THE1B-int	3	1.15985e-37	36.9356	0.118876	43.1	96	LTR/ERVL-MaLR	sk	REP
ZIM3	MLT1L	2	0	308.255	1	105	96	LTR/ERVL-MaLR	sk	REP
ZNF534	MSTD	1	2.29e-08	7.64016	0.0247852	75.9	96	LTR/ERVL-MaLR	sk	REP
ZNF169	MLT1A	2	2.35052e-05	4.62884	0.0347544	105	96	LTR/ERVL-MaLR	sk	REP
ZNF425	MLT1A1	1	6.15e-102	101.211	1	90.9	96	LTR/ERVL-MaLR	vk	REP
ZNF586	MSTA-int	2	0	308.255	1	43.1	96	LTR/ERVL-MaLR	sk	REP
ZNF548	MLT1B	1	2.64e-177	176.578	1	105	96	LTR/ERVL-MaLR	sk	REP
ZNF776	MSTA	1	5.36e-247	246.271	1	43.1	96	LTR/ERVL-MaLR	sk	#N/A
ZNF334	THE1B-int	2	5.44058e-14	13.2644	0.0437835	43.1	105	LTR/ERVL-MaLR	sk	REP
ZNF554	MLT1H	3	2.52175e-72	71.5983	0.913068	105	105	LTR/ERVL-MaLR	sk	REP
ZNF606	MLT1A0	1	1.32e-09	8.87943	0.203255	105	105	LTR/ERVL-MaLR	sk	REP
ZNF674	MLT1C	1	1.47e-12	11.8327	0.49848	105	105	LTR/ERVL-MaLR	sk	REP
ZNF140	THE1B	2	5.65504e-13	12.2476	0.0454136	43.1	105	LTR/ERVL-MaLR	sk	REP
ZNF224	MLT1H2	2	0.0291404	1.5355	0.00476269	105	105	LTR/ERVL-MaLR	sk	REP
ZNF135	MLT1K	1	0.00331	2.48017	0.00804585	105	105	LTR/ERVL-MaLR	sk	REP
ZNF283	MLT1H	1	0	308.255	1	105	105	LTR/ERVL-MaLR	sk	REP
ZNF605	THE1A-int	1	0.00792	2.10127	0.0110335	43.1	105	LTR/ERVL-MaLR	sk	REP
ZNF382	MLT1B	7	2.49462e-47	46.603	0.151183	105	105	LTR/ERVL-MaLR	sk	REP
ZNF461	THE1A	1	0.00698	2.15614	0.0078254	43.1	105	LTR/ERVL-MaLR	sk	REP
ZFP57	THE1A	3	0.0049012	2.3097	0.00714399	43.1	105	LTR/ERVL-MaLR	sk	REP
ZNF264	MLT1A	2	0	308.255	1	105	105	LTR/ERVL-MaLR	sk	REP
ZNF251	THE1B	1	3.85e-61	60.4145	0.195989	43.1	105	LTR/ERVL-MaLR	sk	REP
ZFP69B	MSTB1	1	2.92e-20	19.5346	0.154902	75.9	105	LTR/ERVL-MaLR	sk	#N/A
ZNF846	MLT1F1-int	1	4.33e-05	4.36351	1	105	105	LTR/ERVL-MaLR	sk	REP
ZNF317	MLT1H	3	5.12726e-16	15.2901	0.0483242	105	105	LTR/ERVL-MaLR	sk	REP
ZNF324	MLT1J	2	3.05528e-08	7.51495	0.0404987	105	105	LTR/ERVL-MaLR	sk	#N/A
ZNF134	MLT1E1A	1	6.55e-71	70.1838	0.227681	105	105	LTR/ERVL-MaLR	sk	#N/A
ZNF597	THE1C	2	0.000128579	3.89083	0.23711	43.1	105	LTR/ERVL-MaLR	vk	ACT
ZNF793	THE1B-int	2	0	308.255	1	43.1	105	LTR/ERVL-MaLR	sk	REP
ZNF667	MLT1K	2	0.0468678	1.32913	0.138661	105	105	LTR/ERVL-MaLR	sk	REP
ZNF41	MLT1J	3	3.76085e-07	6.42471	0.0441349	105	105	LTR/ERVL-MaLR	sk	#N/A
ZNF677	THE1D	2	1.62525e-54	53.7891	0.429671	43.1	105	LTR/ERVL-MaLR	sk	REP
ZNF707	THE1B-int	1	0	308.255	1	43.1	105	LTR/ERVL-MaLR	sk	#N/A
ZNF669	THE1B-int	2	9.12073e-09	8.03997	0.0260822	43.1	105	LTR/ERVL-MaLR	sk	REP
ZNF418	THE1A	2	1.41169e-13	12.8503	0.0416871	43.1	105	LTR/ERVL-MaLR	sk	REP
ZFP69	MLT1D	1	0.000184	3.73518	0.0847643	105	105	LTR/ERVL-MaLR	sk	REP
ZNF547	MSTD-int	2	1.60389e-78	77.7948	0.292291	75.9	105	LTR/ERVL-MaLR	sk	#N/A
ZNF485	THE1A	1	0.00355	2.44977	0.00794723	43.1	105	LTR/ERVL-MaLR	sk	REP
ZNF671	MSTA	1	0.0142	1.84771	0.0261919	43.1	105	LTR/ERVL-MaLR	sk	#N/A
ZNF582	MLT1L	3	4.15583e-201	200.381	1	105	105	LTR/ERVL-MaLR	sk	REP
ZNF157	MLT1B	1	1.04e-24	23.983	0.0778024	105	105	LTR/ERVL-MaLR	sk	REP
ZNF230	THE1C-int	1	4.27e-05	4.36957	0.138167	43.1	105	LTR/ERVL-MaLR	sk	REP
ZNF350	MLT1F	2	0	308.537	1	105	105	LTR/ERVL-MaLR	sk	REP
ZNF184	MLT1H	2	2.61672e-06	5.58224	0.308336	105	105	LTR/ERVL-MaLR	sk	REP
ZNF33A	MSTA-int	3	8.05165e-05	4.09412	0.0132024	43.1	105	LTR/ERVL-MaLR	sk	REP
ZNF175	MLT1D	2	0.00112176	2.9501	0.0673459	105	105	LTR/ERVL-MaLR	sk	REP
ZNF454	MSTA-int	2	0.000615007	3.21112	0.222973	43.1	105	LTR/ERVL-MaLR	sk	REP
ZNF10	MLT1B	1	0.0193	1.71444	0.010938	105	105	LTR/ERVL-MaLR	sk	REP
ZNF558	MLT1C	1	4.29e-22	21.3675	0.308825	105	105	LTR/ERVL-MaLR	sk	#N/A
ZNF26	THE1A-int	1	2.47e-07	6.6073	0.0214346	43.1	105	LTR/ERVL-MaLR	vk	#N/A
ZNF584	MLT1H-int	1	5.09e-58	57.2933	1	105	105	LTR/ERVL-MaLR	sk	REP
ZNF331	MLT1G1	4	0	308.255	1	105	105	LTR/ERVL-MaLR	sk	REP
ZNF577	MLT1H	1	2.65e-185	184.577	1	105	105	LTR/ERVL-MaLR	sk	REP
ZNF34	MLT1H	2	0.011707	1.93155	0.0262861	105	105	LTR/ERVL-MaLR	sk	REP
ZNF189	THE1C-int	2	0.0226118	1.64567	0.00533865	43.1	105	LTR/ERVL-MaLR	sk	#N/A
ZNF214	MLT1H	2	0.00480541	2.31827	0.459047	105	105	LTR/ERVL-MaLR	sk	REP
ZNF420	MLT1J	1	4.14e-254	253.383	1	105	105	LTR/ERVL-MaLR	sk	REP
RBAK	MLT1I	1	1.65e-14	13.7825	1	105	105	LTR/ERVL-MaLR	sk	REP
ZNF12	MLT1I	3	0	308.255	1	105	105	LTR/ERVL-MaLR	sk	REP
ZNF566	MLT1J	1	7.38e-228	227.132	1	105	105	LTR/ERVL-MaLR	sk	#N/A
ZNF805	MLT1D	1	0	312.254	1	105	105	LTR/ERVL-MaLR	sk	REP
ZNF543	MLT1E3	1	8.55e-36	35.068	1	105	105	LTR/ERVL-MaLR	sk	REP
ZNF226	MLT1D-int	1	1.26e-08	7.89963	1	105	105	LTR/ERVL-MaLR	sk	REP
ZNF234	MLT1D-int	1	0.00179	2.74715	1	105	105	LTR/ERVL-MaLR	sk	REP
ZNF181	MLT1E2	1	6.8e-49	48.1675	1	105	105	LTR/ERVL-MaLR	sk	REP
ZNF304	MLT1F	1	0	308.255	1	105	105	LTR/ERVL-MaLR	sk	REP
ZNF772	MLT1E3	1	0.00143	2.84466	1	105	105	LTR/ERVL-MaLR	sk	REP
ZNF383	MLT1J2	1	1.31e-164	163.883	1	105	105	LTR/ERVL-MaLR	sk	REP
ZNF621	MLT1K	1	4.87e-115	114.312	1	105	105	LTR/ERVL-MaLR	sk	REP
ZNF527	MLT1N2	1	1.55e-11	10.8097	1	105	105	LTR/ERVL-MaLR	sk	REP
ZNF436	THE1B-int	2	0.00309533	2.50929	0.00814032	43.1	159	LTR/ERVL-MaLR	sk	#N/A
ZNF786	THE1C-int	1	1.29e-07	6.88941	0.0675517	43.1	159	LTR/ERVL-MaLR	vk	REP
ZKSCAN5	MSTB1	1	0.00364	2.4389	0.0466538	75.9	159	LTR/ERVL-MaLR	vk	#N/A
ZNF2	MSTA-int	1	0.0369	1.43297	0.0144268	43.1	159	LTR/ERVL-MaLR	sk	REP
ZNF789	MLT1N2	1	0.0143	1.84466	0.04004	105	159	LTR/ERVL-MaLR	sk	REP
ZNF705D	THE1D	1	4.81e-17	16.3179	0.0529363	43.1	312	LTR/ERVL-MaLR	sk	#N/A
ZNF705A	THE1D	1	1.09e-106	105.963	0.34375	43.1	312	LTR/ERVL-MaLR	sk	REP
ZNF75D	THE1B	2	2.11301e-100	99.6751	0.401384	43.1	312	LTR/ERVL-MaLR	vk	REP
ZNF705B	THE1D	1	3.05e-26	25.5157	0.0827747	43.1	312	LTR/ERVL-MaLR	sk	#N/A

## Sheet: LINE_L1
KZFP	TE_target_subfam	n_merge	merged_padj.final	minus_log10_padj	weight	Subfam_age	KZFP_age	TE_family	KRAB_type_Helleboid_2019	KRAB_type_Tycko_2020
PRDM9	L1PA7	1	4.18e-45	44.3788	0.220117	75.9	0	LINE/L1	vk	#N/A
ZNF90	L1P3b	1	0.0357	1.44733	0.00853009	75.9	9.1	LINE/L1	sk	REP
ZNF93	L1PA3	1	0	308.255	1	19.9	9.1	LINE/L1	sk	#N/A
ZNF723	L1MA8	1	1.26e-108	107.9	0.884636	90.9	15.8	LINE/L1	sk	REP
ZNF765	L1PA4	1	0	308.255	1	19.9	15.8	LINE/L1	sk	#N/A
ZNF479	L1PB1	1	0	308.255	1	75.9	20.2	LINE/L1	sk	#N/A
ZNF429	L1PA16	1	2.47e-143	142.607	1	75.9	29.4	LINE/L1	sk	REP
ZNF440	L1PA14	1	1.34e-36	35.8729	0.116374	75.9	29.4	LINE/L1	sk	REP
ZNF701	L1M2	2	6.77468e-08	7.16911	0.0306808	105	29.4	LINE/L1	sk	#N/A
ZNF626	L1PA7	1	1.4e-15	14.8539	0.253425	75.9	29.4	LINE/L1	sk	REP
ZNF253	L1M7	1	0.0104	1.98297	0.00643288	105	29.4	LINE/L1	sk	REP
ZNF85	L1PA7	2	1.70964e-13	12.7671	0.0695377	75.9	29.4	LINE/L1	sk	REP
ZNF680	L1M7	4	1.50981e-11	10.8211	0.0340065	105	43.2	LINE/L1	sk	REP
ZNF708	L1PA8A	2	1.90914e-05	4.71916	0.0431635	75.9	43.2	LINE/L1	sk	#N/A
ZNF43	L1MDa	1	0.0124	1.90658	0.00618507	105	43.2	LINE/L1	sk	REP
ZNF595	L1M4	1	0.0031	2.50864	0.043778	105	43.2	LINE/L1	sk	#N/A
ZNF141	L1PA3	1	3.28e-129	128.484	1	19.9	43.2	LINE/L1	sk	REP
ZNF766	L1MB7	1	2.38e-18	17.6234	0.0571716	105	43.2	LINE/L1	sk	REP
ZNF17	L1PA7	1	0	308.255	1	75.9	43.2	LINE/L1	sk	REP
ZNF880	L1M1	1	2.53e-31	30.5969	1	75.9	43.2	LINE/L1	sk	#N/A
ZNF679	L1P2	1	0.0385	1.41454	0.00458886	29.1	43.2	LINE/L1	sk	#N/A
ZNF490	L1PB1	2	0	315.764	1	75.9	43.2	LINE/L1	sk	REP
ZNF337	L1PA15-16	1	1.53e-71	70.8153	1	75.9	43.2	LINE/L1	sk	REP
ZNF480	L1MB2	1	9.53e-06	5.02091	0.0162882	105	43.2	LINE/L1	sk	REP
ZNF528	L1PBa	4	0	308.255	1	75.9	43.2	LINE/L1	sk	REP
ZNF136	L1M2	3	0	308.255	1	105	74	LINE/L1	sk	REP
ZNF625	L1MA2	1	3.29e-128	127.483	1	75.9	74	LINE/L1	sk	#N/A
ZNF433	L1PREC2	1	3.19e-113	112.496	0.364946	43.1	74	LINE/L1	sk	REP
ZNF823	L1PA7	1	2.78e-78	77.556	0.251597	75.9	76	LINE/L1	sk	REP
ZNF320	L1M3f	3	0.0311011	1.50722	0.00488954	90.9	76	LINE/L1	sk	#N/A
ZNF563	L1M1	2	5.75178e-77	76.2402	1	75.9	76	LINE/L1	sk	REP
ZNF160	L1M1	1	0	308.255	1	75.9	90	LINE/L1	sk	#N/A
ZNF665	L1M3f	1	1.04e-60	59.983	1	90.9	90	LINE/L1	sk	#N/A
ZNF791	L1MEf	1	3.47e-10	9.45967	1	105	90	LINE/L1	sk	REP
ZNF549	L1M4b	3	0.000307007	3.51285	0.011306	105	96	LINE/L1	sk	REP
ZIM3	L1MDa	2	7.16334e-66	65.1449	0.211335	105	96	LINE/L1	sk	REP
ZNF425	L1M1	1	2.1e-75	74.6778	0.737842	75.9	96	LINE/L1	vk	REP
ZNF792	L1PB1	2	4.80974e-05	4.31788	0.0154644	75.9	96	LINE/L1	sk	REP
ZIK1	L1MC1	1	7.53e-08	7.12321	0.232018	105	96	LINE/L1	sk	REP
ZNF211	L1PB1	2	1.23779e-24	23.9074	0.0789189	75.9	96	LINE/L1	sk	REP
ZNF334	L1PA7	2	4.95644e-13	12.3048	0.0406163	75.9	105	LINE/L1	sk	REP
ZNF287	HAL1	1	4.73e-39	38.3251	1	105	105	LINE/L1	sk	#N/A
ZNF554	HAL1	3	7.54195e-62	61.1225	0.779474	105	105	LINE/L1	sk	REP
ZNF585A	L1MEg	1	4.16e-38	37.3809	1	105	105	LINE/L1	sk	REP
ZNF222	L1PA15-16	1	4.3e-17	16.3665	0.755135	75.9	105	LINE/L1	sk	REP
ZNF606	L1PA7	1	2.06e-44	43.6861	1	75.9	105	LINE/L1	sk	REP
ZNF674	HAL1	1	1.83e-24	23.7375	1	105	105	LINE/L1	sk	REP
ZNF140	L1MB7	2	2.04402e-270	269.69	1	105	105	LINE/L1	sk	REP
ZNF224	L1M4b	2	0.0120933	1.91746	0.00594739	105	105	LINE/L1	sk	REP
ZNF300	L1PA7	1	1.28e-06	5.89279	0.15014	75.9	105	LINE/L1	sk	REP
ZNF283	L1PA7	1	4.19e-05	4.37779	0.0142018	75.9	105	LINE/L1	sk	REP
ZNF605	L1MC4	1	3.59e-191	190.445	1	105	105	LINE/L1	sk	REP
ZNF630	L1MD	1	0.0175	1.75696	0.593053	105	105	LINE/L1	sk	REP
ZNF382	L1HS	7	0	308.255	1	6.6	105	LINE/L1	sk	REP
ZNF264	L1PA2	2	0	308.255	1	15.8	105	LINE/L1	sk	REP
ZNF251	L1MA3	1	0	308.255	1	75.9	105	LINE/L1	sk	REP
ZFP69B	L1PA12	1	3.61e-06	5.44249	0.0431569	75.9	105	LINE/L1	sk	#N/A
ZNF394	L1M5	2	1.05442e-40	39.977	1	163.7	105	LINE/L1	vk	#N/A
ZNF317	L1M4b	3	0	316.407	1	105	105	LINE/L1	sk	REP
ZNF324	L1MA3	2	0.000255792	3.59211	0.0193582	75.9	105	LINE/L1	sk	#N/A
ZNF134	L1MB7	1	2.06e-95	94.6861	0.307168	105	105	LINE/L1	sk	#N/A
ZNF793	L1MEc	2	2.11316e-145	144.675	0.469336	105	105	LINE/L1	sk	REP
ZNF81	L1PB1	1	0	308.255	1	75.9	105	LINE/L1	sk	REP
ZFP90	L1PA7	1	4.28e-37	36.3686	1	75.9	105	LINE/L1	sk	#N/A
ZNF197	L1MEg	1	9.6e-46	45.0177	1	105	105	LINE/L1	sk	REP
ZNF471	L1M1	1	0	308.255	1	75.9	105	LINE/L1	sk	REP
ZNF470	HAL1	1	5.98e-20	19.2233	1	105	105	LINE/L1	sk	REP
ZFP1	HAL1	2	3.67381e-39	38.4349	1	105	105	LINE/L1	sk	REP
ZNF133	L1M7	1	4.08e-205	204.389	1	105	105	LINE/L1	sk	#N/A
ZNF41	L1MEd	3	2.69271e-146	145.57	1	105	105	LINE/L1	sk	#N/A
ZNF583	L1M6	1	6.93e-17	16.1593	1	105	105	LINE/L1	sk	REP
ZNF570	HAL1	1	6.61e-28	27.1798	1	105	105	LINE/L1	sk	REP
ZNF677	L1M4b	2	2.48209e-94	93.6052	0.747724	105	105	LINE/L1	sk	REP
ZNF669	L1MEg	2	3.09939e-16	15.5087	0.0503114	105	105	LINE/L1	sk	REP
ZFP69	L1MC4a	1	8.6e-45	44.0655	1	105	105	LINE/L1	sk	REP
ZNF547	L1MEg	2	6.22134e-07	6.20612	0.0233176	105	105	LINE/L1	sk	#N/A
ZNF485	L1MC1	1	4.21e-47	46.3757	0.150446	105	105	LINE/L1	sk	REP
ZNF671	L1M4b	1	6.82e-10	9.16622	0.129934	105	105	LINE/L1	sk	#N/A
ZNF582	L1MCb	3	6.84257e-26	25.1648	0.125584	105	105	LINE/L1	sk	REP
ZNF154	L1M4c	1	8.43e-84	83.0742	1	105	105	LINE/L1	sk	#N/A
ZNF585B	L1MA4	1	0.0372	1.42946	0.00575931	90.9	105	LINE/L1	sk	REP
ZNF230	L1PA17	1	2.37e-32	31.6253	1	75.9	105	LINE/L1	sk	REP
ZNF250	L1PA3	3	0	308.255	1	19.9	105	LINE/L1	sk	REP
ZNF84	L1PA16	2	0	308.255	1	75.9	105	LINE/L1	sk	REP
ZNF350	L1PA2	2	4.09799e-30	29.3874	0.0952477	15.8	105	LINE/L1	sk	REP
ZNF184	L1PA3	2	7.86306e-19	18.1044	1	19.9	105	LINE/L1	sk	REP
ZNF649	L1PA3	1	0	308.255	1	19.9	105	LINE/L1	sk	REP
ZNF8	L1MB7	2	0	308.255	1	105	105	LINE/L1	sk	REP
ZNF33A	L1MEd	3	0	310.104	1	105	105	LINE/L1	sk	REP
ZNF354A	L1MEc	2	1.18146e-261	260.928	1	105	105	LINE/L1	sk	#N/A
ZNF248	L1PA5	1	0	308.255	1	19.9	105	LINE/L1	sk	REP
ZNF879	L1PB1	1	4.24e-61	60.3726	1	75.9	105	LINE/L1	sk	#N/A
ZNF175	L1PA15	2	4.35338e-09	8.36117	0.190872	75.9	105	LINE/L1	sk	REP
ZNF454	L1MC	2	2.17661e-07	6.66222	0.462609	105	105	LINE/L1	sk	REP
ZNF225	L1M3f	1	4.14e-70	69.383	1	90.9	105	LINE/L1	sk	REP
ZNF782	L1M4b	1	1.71e-48	47.767	1	105	105	LINE/L1	sk	REP
ZNF432	L1M4	1	5.91e-176	175.228	1	105	105	LINE/L1	sk	#N/A
ZNF10	L1MB7	1	1.81e-157	156.742	1	105	105	LINE/L1	sk	REP
ZNF7	L1ME1	2	6.71341e-181	180.173	1	105	105	LINE/L1	sk	REP
ZNF558	L1MEg	1	6.46e-70	69.1898	1	105	105	LINE/L1	sk	#N/A
ZNF26	L1MEc	1	0	308.255	1	105	105	LINE/L1	vk	#N/A
ZNF74	L1ME4a	1	4.93e-58	57.3072	1	105	105	LINE/L1	sk	REP
ZNF569	L1M7	1	9.39e-40	39.0273	1	105	105	LINE/L1	sk	REP
ZNF584	L1MA7	1	4.1e-08	7.38722	0.128937	90.9	105	LINE/L1	sk	REP
ZFP14	L1ME1	1	1.16e-23	22.9355	1	105	105	LINE/L1	sk	REP
ZNF484	L1MC5	1	0	308.255	1	105	105	LINE/L1	sk	REP
ZNF567	L1MEg	1	1.48e-221	220.83	1	105	105	LINE/L1	sk	REP
ZNF615	L1MC3	1	1.49e-76	75.8268	1	105	105	LINE/L1	sk	REP
ZNF529	L1MD2	1	1.8e-49	48.7447	1	105	105	LINE/L1	sk	REP
ZNF614	L1MEc	1	1.17e-11	10.9318	1	105	105	LINE/L1	sk	REP
ZNF613	L1MDa	1	0.000274	3.56225	0.294423	105	105	LINE/L1	sk	REP
ZFP30	L1MEg	1	2.07e-248	247.684	1	105	105	LINE/L1	sk	REP
ZNF235	L1MEb	1	0.00832	2.07988	1	105	105	LINE/L1	sk	REP
ZNF45	L1MEb	1	3.22e-35	34.4921	1	105	105	LINE/L1	sk	REP
ZNF354B	L1MEc	1	0.031	1.50864	1	105	105	LINE/L1	sk	#N/A
ZFP82	L1MEg	2	3.94696e-164	163.404	1	105	105	LINE/L1	sk	REP
ZNF223	L1PA16	1	6.84e-17	16.1649	1	75.9	105	LINE/L1	sk	REP
ZNF331	L1PA7	4	1.33664e-36	35.874	0.116378	75.9	105	LINE/L1	sk	REP
ZNF577	L1PA2	1	8.96e-26	25.0477	0.135703	15.8	105	LINE/L1	sk	REP
ZNF354C	L1PA7	1	1.94e-74	73.7122	1	75.9	105	LINE/L1	sk	REP
ZNF34	L1PA5	2	0.0315975	1.50035	0.0204179	19.9	105	LINE/L1	sk	REP
ZNF786	L1PREC2	1	1.51e-06	5.82102	0.057076	43.1	159	LINE/L1	vk	REP
ZNF263	L1PA3	8	1.93081e-220	219.714	0.802647	19.9	159	LINE/L1	vk	#N/A
ZNF205	L1PB1	1	3.31e-11	10.4802	0.635412	75.9	159	LINE/L1	sk	#N/A
ZNF2	L1PA15-16	1	1.86e-08	7.73049	0.0778287	75.9	159	LINE/L1	sk	REP
ZKSCAN8	L1PA7	2	2.60977e-27	26.5834	1	75.9	159	LINE/L1	vk	#N/A
ZNF18	L1PA5	4	0.000455615	3.3414	0.0108397	19.9	312	LINE/L1	vk	#N/A
ZNF705D	L1PA14	1	1.89e-72	71.7235	0.232676	75.9	312	LINE/L1	sk	#N/A
ZNF705A	L1PA13	1	1.76e-133	132.754	0.430665	75.9	312	LINE/L1	sk	REP
ZNF75D	L1MC5	2	1.38706e-33	32.8579	0.132316	105	312	LINE/L1	vk	REP
ZNF705B	L1PA13	1	3.91e-152	151.408	0.491178	75.9	312	LINE/L1	sk	#N/A
ZNF777	L1PA7	3	1.97935e-08	7.70348	0.726303	75.9	312.1	LINE/L1	vk	#N/A

## Sheet: SINE_Alu
KZFP	TE_target_subfam	n_merge	merged_padj.final	minus_log10_padj	weight	Subfam_age	KZFP_age	TE_family	KRAB_type_Helleboid_2019	KRAB_type_Tycko_2020
PRDM9	AluY	1	3.4e-171	170.469	0.845518	75.9	0	SINE/Alu	vk	#N/A
ZNF90	AluY	1	2.15e-41	40.6676	0.239681	75.9	9.1	SINE/Alu	sk	REP
ZNF676	AluY	1	6.04e-33	32.219	0.104521	75.9	15.8	SINE/Alu	sk	#N/A
ZNF429	AluSz	1	3.63e-48	47.4401	0.332662	75.9	29.4	SINE/Alu	sk	REP
ZNF257	AluY	3	4.36645e-110	109.36	1	75.9	29.4	SINE/Alu	sk	REP
ZNF675	AluY	1	1.6e-16	15.7959	0.0512429	75.9	29.4	SINE/Alu	sk	REP
ZNF506	AluJb	1	3.7e-203	202.432	1	75.9	43.2	SINE/Alu	sk	#N/A
ZNF616	AluY	1	9.12e-42	41.04	0.56574	75.9	43.2	SINE/Alu	sk	#N/A
ZNF101	AluJo	1	9.59e-11	10.0182	0.38569	75.9	43.2	SINE/Alu	sk	REP
ZNF441	AluSg	1	0	308.255	1	75.9	43.2	SINE/Alu	sk	REP
ZNF695	AluY	1	5.87e-08	7.23136	0.102661	75.9	43.2	SINE/Alu	sk	REP
ZNF136	AluY	3	2.50035e-97	96.602	0.313384	75.9	74	SINE/Alu	sk	REP
ZNF778	AluY	2	2.87703e-19	18.5411	0.0601485	75.9	74	SINE/Alu	sk	REP
ZNF823	AluSc5	1	5.52e-14	13.2581	0.0430101	75.9	76	SINE/Alu	sk	REP
ZNF77	AluYa5	1	0.002	2.69897	0.079541	15.8	76	SINE/Alu	sk	REP
ZNF519	AluSx	1	0	308.255	1	75.9	96	SINE/Alu	sk	REP
ZNF573	AluJb	1	5.5e-39	38.2596	0.526488	75.9	96	SINE/Alu	sk	REP
ZNF555	AluY	1	1.47e-09	8.83268	0.0286538	75.9	96	SINE/Alu	sk	REP
ZNF30	AluYa5	5	0.000236556	3.62607	0.0117632	15.8	96	SINE/Alu	sk	REP
ZNF334	AluY	2	1.11411e-303	302.953	1	75.9	105	SINE/Alu	sk	REP
ZNF287	AluJb	1	2.44e-25	24.6126	0.642205	75.9	105	SINE/Alu	sk	#N/A
ZNF554	AluJb	3	0.00467235	2.33046	0.0297196	75.9	105	SINE/Alu	sk	REP
ZNF585A	FLAM_C	1	0.000233	3.63264	0.0971791	75.9	105	SINE/Alu	sk	REP
ZNF222	AluJb	1	0.00373	2.42829	0.112039	75.9	105	SINE/Alu	sk	REP
ZNF606	AluY	1	2.28e-26	25.6421	0.586961	75.9	105	SINE/Alu	sk	REP
ZNF460	AluSx	1	0	308.255	1	75.9	105	SINE/Alu	sk	REP
ZNF674	AluJb	1	1.36e-07	6.86646	0.289266	75.9	105	SINE/Alu	sk	REP
ZNF284	FRAM	1	0	318.208	1	75.9	105	SINE/Alu	sk	REP
ZNF140	AluJb	2	0.00258696	2.58721	0.00959329	75.9	105	SINE/Alu	sk	REP
ZNF224	AluJb	2	4.38248e-13	12.3583	0.0383318	75.9	105	SINE/Alu	sk	REP
ZNF135	AluJb	1	0	308.255	1	75.9	105	SINE/Alu	sk	REP
ZNF300	AluJb	1	1.36e-09	8.86646	0.225904	75.9	105	SINE/Alu	sk	REP
ZNF283	AluY	1	2.9e-59	58.5376	0.1899	75.9	105	SINE/Alu	sk	REP
ZNF605	AluY	1	1.26e-47	46.8996	0.246264	75.9	105	SINE/Alu	sk	REP
ZNF630	FRAM	1	0.00109	2.96257	1	75.9	105	SINE/Alu	sk	REP
ZNF382	AluJr4	7	0.000708184	3.14985	0.0102183	75.9	105	SINE/Alu	sk	REP
ZNF461	AluY	1	7.97e-116	115.099	0.417733	75.9	105	SINE/Alu	sk	REP
ZNF445	AluY	1	1.86e-41	40.7305	1	75.9	105	SINE/Alu	sk	REP
ZFP57	AluY	3	8.19913e-109	108.086	0.334315	75.9	105	SINE/Alu	sk	REP
ZNF264	AluY	2	0.0010578	2.9756	0.00965305	75.9	105	SINE/Alu	sk	REP
ZNF251	AluSq2	1	1.24e-23	22.9066	0.0743106	75.9	105	SINE/Alu	sk	REP
ZFP69B	AluY	1	1.28e-05	4.89279	0.0387979	75.9	105	SINE/Alu	sk	#N/A
ZNF394	AluY	2	0.00431565	2.36495	0.0591579	75.9	105	SINE/Alu	vk	#N/A
ZNF846	AluYa5	1	0.000115	3.9393	0.902782	15.8	105	SINE/Alu	sk	REP
ZNF81	FLAM_A	1	0.0238	1.62342	0.0052665	75.9	105	SINE/Alu	sk	REP
ZFP90	FRAM	1	0.000531	3.27491	0.0900477	75.9	105	SINE/Alu	sk	#N/A
ZNF436	AluY	2	4.66027e-218	217.332	0.705039	75.9	159	SINE/Alu	sk	#N/A
ZNF3	AluJr	3	5.63171e-13	12.2494	0.155348	75.9	159	SINE/Alu	sk	#N/A
ZNF786	AluJb	1	1.03e-102	101.987	1	75.9	159	SINE/Alu	vk	REP
ZKSCAN2	AluSx	1	0.0161	1.79317	1	75.9	159	SINE/Alu	vk	#N/A
ZKSCAN7	FAM	1	0.000636	3.19654	1	90.9	159	SINE/Alu	vk	#N/A
ZNF263	FRAM	8	0.000339559	3.46909	0.012673	75.9	159	SINE/Alu	vk	#N/A
ZNF18	AluY	4	0	308.255	1	75.9	312	SINE/Alu	vk	#N/A
ZNF777	AluSx	3	0.0019693	2.70569	0.255099	75.9	312.1	SINE/Alu	vk	#N/A
ZNF398	AluYa5	1	1.64e-05	4.78516	1	15.8	312.1	SINE/Alu	vk	#N/A

## Sheet: LTR_ERV1
KZFP	TE_target_subfam	n_merge	merged_padj.final	minus_log10_padj	weight	Subfam_age	KZFP_age	TE_family	KRAB_type_Helleboid_2019	KRAB_type_Tycko_2020
PRDM9	HERV9-int	1	3.05e-10	9.5157	0.0471975	29.1	0	LTR/ERV1	vk	#N/A
ZNF90	HERVH-int	1	2.12e-170	169.674	1	29.1	9.1	LTR/ERV1	sk	REP
ZNF93	LTR10E	1	0.0464	1.33348	0.00432591	29.1	9.1	LTR/ERV1	sk	#N/A
ZNF676	LTR12C	1	0	308.255	1	19.9	15.8	LTR/ERV1	sk	#N/A
ZNF723	HERV9-int	1	1.07e-122	121.971	1	29.1	15.8	LTR/ERV1	sk	REP
ZNF765	LTR4	1	0.00226	2.64589	0.00858346	29.1	15.8	LTR/ERV1	sk	#N/A
ZNF479	LTR12C	1	6e-270	269.222	0.873375	19.9	20.2	LTR/ERV1	sk	#N/A
ZNF429	LTR76	1	3.85e-09	8.41454	0.059005	75.9	29.4	LTR/ERV1	sk	REP
ZNF257	HERV9-int	3	4.31658e-50	49.3649	0.451398	29.1	29.4	LTR/ERV1	sk	REP
ZNF675	LTR1	1	0.000349	3.45717	0.0112153	43.1	29.4	LTR/ERV1	sk	REP
ZNF440	MER4A1	1	7.72e-30	29.1124	0.0944426	75.9	29.4	LTR/ERV1	sk	REP
ZNF493	Harlequin-int	1	1.11e-205	204.955	1	75.9	29.4	LTR/ERV1	sk	#N/A
ZNF600	HERVH-int	1	6.37e-198	197.196	1	29.1	29.4	LTR/ERV1	sk	#N/A
ZNF701	LTR19A	2	1.22093e-92	91.9133	0.39335	43.1	29.4	LTR/ERV1	sk	#N/A
ZNF845	LTR76	1	7.39e-178	177.131	1	75.9	29.4	LTR/ERV1	sk	#N/A
ZNF728	HERV9-int	1	0	315.345	1	29.1	29.4	LTR/ERV1	sk	#N/A
ZNF808	LTR7B	1	0	308.255	1	29.1	29.4	LTR/ERV1	sk	#N/A
ZNF486	HERVFH21-int	1	4.63e-20	19.3344	1	29.1	29.4	LTR/ERV1	sk	REP
ZNF726	HERVIP10F-int	1	1.52e-50	49.8182	1	29.1	29.4	LTR/ERV1	sk	REP
ZNF626	LTR10C	1	2.08e-11	10.6819	0.182246	29.1	29.4	LTR/ERV1	sk	REP
ZNF730	PABL_A	1	0	308.255	1	75.9	29.4	LTR/ERV1	sk	REP
ZNF85	MER41-int	2	2.5143e-184	183.6	1	75.9	29.4	LTR/ERV1	sk	REP
ZNF813	LTR2	1	2.31e-107	106.636	1	29.1	29.4	LTR/ERV1	sk	#N/A
ZNF681	LTR9	1	3.85e-172	171.415	1	43.1	29.4	LTR/ERV1	sk	REP
ZNF544	MER61F	2	1.24258e-08	7.90568	1	43.1	29.4	LTR/ERV1	sk	REP
ZNF530	LTR48	1	1.51e-163	162.821	1	75.9	29.4	LTR/ERV1	sk	REP
ZNF57	LTR7B	1	3.41e-10	9.46725	0.651158	29.1	29.4	LTR/ERV1	sk	REP
ZNF506	HUERS-P1-int	1	1.64e-43	42.7852	0.211356	43.1	43.2	LTR/ERV1	sk	#N/A
ZNF616	MER61-int	1	2.87e-73	72.5421	1	43.1	43.2	LTR/ERV1	sk	#N/A
ZNF101	HERV9-int	1	1.06e-26	25.9747	1	29.1	43.2	LTR/ERV1	sk	REP
ZNF441	LOR1a	1	6.44e-20	19.1911	0.0622573	75.9	43.2	LTR/ERV1	sk	REP
ZNF695	MER4D	1	3.64e-71	70.4389	1	75.9	43.2	LTR/ERV1	sk	REP
ZNF736	LTR27	1	0	321.173	1	43.1	43.2	LTR/ERV1	sk	REP
ZNF680	MER61F	4	0	318.206	1	43.1	43.2	LTR/ERV1	sk	REP
ZNF708	MER41-int	2	4.65406e-110	109.332	1	75.9	43.2	LTR/ERV1	sk	#N/A
ZNF716	LTR6A	1	0.00015	3.82391	1	29.1	43.2	LTR/ERV1	sk	REP
ZNF43	MER4-int	1	0	308.255	1	75.9	43.2	LTR/ERV1	sk	REP
ZNF595	MER61-int	1	4.97e-58	57.3036	1	43.1	43.2	LTR/ERV1	sk	#N/A
ZNF141	HUERS-P3-int	1	9.3e-52	51.0315	0.397181	43.1	43.2	LTR/ERV1	sk	REP
ZNF100	HERVE-int	3	2.61691e-23	22.5822	0.0732583	19.9	43.2	LTR/ERV1	sk	REP
ZNF766	MER4C	1	2.07e-166	165.684	0.537491	75.9	43.2	LTR/ERV1	sk	REP
ZNF679	MER4E1	1	1.28e-53	52.8928	0.171588	75.9	43.2	LTR/ERV1	sk	#N/A
ZNF559	MER57B2	1	1.08e-14	13.9666	0.234397	67.6	43.2	LTR/ERV1	sk	REP
ZNF490	LOR1-int	2	0.00220419	2.65675	0.00841372	75.9	43.2	LTR/ERV1	sk	REP
ZNF480	LTR8A	1	0	308.255	1	43.1	43.2	LTR/ERV1	sk	REP
ZNF528	MER52A	4	2.07958e-14	13.682	0.0443855	75.9	43.2	LTR/ERV1	sk	REP
ZNF124	LOR1a	1	0	308.255	1	75.9	43.2	LTR/ERV1	sk	REP
ZNF254	LOR1a	1	1.12e-20	19.9508	0.0647217	75.9	43.2	LTR/ERV1	sk	REP
ZNF347	LTR1	1	0	308.255	1	43.1	43.2	LTR/ERV1	sk	REP
ZNF561	LTR10C	1	8.15e-247	246.089	1	29.1	43.2	LTR/ERV1	sk	REP
ZNF562	LTR10A	1	0	308.255	1	29.1	43.2	LTR/ERV1	sk	REP
ZNF682	MER66B	2	0	308.255	1	43.1	43.2	LTR/ERV1	sk	REP
ZNF273	MER52A	1	0	308.255	1	75.9	43.2	LTR/ERV1	sk	#N/A
ZNF431	LTR2C	1	4.12e-08	7.3851	0.225744	19.9	43.2	LTR/ERV1	sk	REP
ZNF749	LTR39	1	0.00175	2.75696	0.169961	43.1	43.2	LTR/ERV1	sk	#N/A
ZNF492	LTR61	1	0.000113	3.94692	1	75.9	43.2	LTR/ERV1	sk	#N/A
ZNF670	MER72	1	2.14e-06	5.66959	1	43.1	43.2	LTR/ERV1	sk	#N/A
ZNF136	LTR12C	3	0.0230571	1.63719	0.00531117	19.9	74	LTR/ERV1	sk	REP
ZNF778	LTR12E	2	1.31202e-10	9.88206	0.0320581	19.9	74	LTR/ERV1	sk	REP
ZNF417	MER61-int	1	1.76e-48	47.7545	1	43.1	74	LTR/ERV1	sk	REP
ZNF587	MER61-int	2	1.08742e-37	36.9636	1	43.1	74	LTR/ERV1	sk	#N/A
ZNF780A	MER61E	1	2.24e-274	273.65	1	43.1	74	LTR/ERV1	sk	#N/A
ZNF780B	MER65C	1	0	308.255	1	75.9	74	LTR/ERV1	sk	REP
ZNF625	MER50C	1	5.28e-30	29.2774	0.229657	43.1	74	LTR/ERV1	sk	#N/A
ZNF607	MER50	1	0	308.255	1	43.1	74	LTR/ERV1	sk	REP
ZNF823	LTR8	1	0	308.255	1	43.1	76	LTR/ERV1	sk	REP
ZNF77	MER57E1	1	1.17e-34	33.9318	1	90.9	76	LTR/ERV1	sk	REP
ZNF320	LTR12C	3	2.15234e-159	158.667	0.514727	19.9	76	LTR/ERV1	sk	#N/A
ZNF28	LTR2C	1	2.12e-24	23.6737	0.171869	19.9	76	LTR/ERV1	sk	#N/A
ZNF468	LTR17	1	3.81e-261	260.419	0.844818	29.1	76	LTR/ERV1	sk	#N/A
ZNF563	LTR12C	2	5.00098e-09	8.30094	0.108879	19.9	76	LTR/ERV1	sk	REP
ZNF799	LOR1b	1	1e-273	273	1	75.9	76	LTR/ERV1	sk	REP
ZNF878	MER66C	1	2.15e-18	17.6676	0.99324	43.1	76	LTR/ERV1	sk	REP
ZNF442	LTR8A	1	5.8e-57	56.2366	1	43.1	76	LTR/ERV1	sk	REP
ZNF519	MER52A	1	0	308.255	1	75.9	96	LTR/ERV1	sk	REP
ZNF573	LTR1	1	1.11e-05	4.95468	0.0681809	43.1	96	LTR/ERV1	sk	REP
ZNF30	LTR76	5	1.1998e-47	46.9209	0.152215	75.9	96	LTR/ERV1	sk	REP
ZNF596	HERVIP10FH-int	1	0.00064	3.19382	0.768917	29.1	96	LTR/ERV1	sk	REP
ZNF37A	LTR76	2	1.93281e-19	18.7138	0.0607089	75.9	96	LTR/ERV1	sk	REP
ZNF549	MER57D	3	0	308.255	0.992111	90.9	96	LTR/ERV1	sk	REP
ZIM3	LTR17	2	5.80823e-14	13.236	0.0429384	29.1	96	LTR/ERV1	sk	REP
ZNF534	HERVH-int	1	0	308.255	1	29.1	96	LTR/ERV1	sk	REP
ZNF169	MER31B	2	7.84521e-120	119.105	0.894271	105	96	LTR/ERV1	sk	REP
ZNF425	LTR71B	1	3.6e-21	20.4437	0.201991	43.1	96	LTR/ERV1	vk	REP
ZNF792	MER89	2	6.09608e-280	279.215	1	105	96	LTR/ERV1	sk	REP
ZNF211	MER34A	2	1.15943e-303	302.936	1	105	96	LTR/ERV1	sk	REP
ZNF556	LTR12C	1	0.00288	2.54061	0.225479	19.9	96	LTR/ERV1	sk	REP
ZNF586	LTR76	2	1.3097e-13	12.8828	0.0417928	75.9	96	LTR/ERV1	sk	REP
ZNF334	LTR12C	2	6.13053e-35	34.2125	0.11293	19.9	105	LTR/ERV1	sk	REP
ZNF287	LTR56	1	0.0379	1.42136	0.0370869	75.9	105	LTR/ERV1	sk	#N/A
ZNF554	LTR76	3	1.8222e-24	23.7394	0.30274	75.9	105	LTR/ERV1	sk	REP
ZNF585A	MER57-int	1	0.0369	1.43297	0.0383344	90.9	105	LTR/ERV1	sk	REP
ZNF222	HUERS-P3-int	1	4.13e-07	6.38405	0.294553	43.1	105	LTR/ERV1	sk	REP
ZNF606	MER39B	1	0.000674	3.17134	0.0725937	75.9	105	LTR/ERV1	sk	REP
ZNF140	LTR2	2	1.55285e-27	26.8089	0.0994064	29.1	105	LTR/ERV1	sk	REP
ZNF224	LTR76	2	1.85341e-18	17.732	0.0549996	75.9	105	LTR/ERV1	sk	REP
ZNF300	HERVH-int	1	2.01e-08	7.6968	0.196103	29.1	105	LTR/ERV1	sk	REP
ZNF283	LTR8	1	0.000996	3.00174	0.00973786	43.1	105	LTR/ERV1	sk	REP
ZNF605	LTR12C	1	1.1e-96	95.9586	0.503865	19.9	105	LTR/ERV1	sk	REP
ZNF382	LTR76	7	2.73575e-33	32.5629	0.105636	75.9	105	LTR/ERV1	sk	REP
ZNF461	LTR12C	1	1.02e-247	246.991	0.896418	19.9	105	LTR/ERV1	sk	REP
ZNF445	HERV30-int	1	2.52e-08	7.5986	0.186558	29.1	105	LTR/ERV1	sk	REP
ZFP57	LTR12C	3	0	323.306	1	19.9	105	LTR/ERV1	sk	REP
ZNF264	MER4-int	2	3.87026e-13	12.4123	0.0402662	75.9	105	LTR/ERV1	sk	REP
ZNF251	MER50	1	3.84e-14	13.4157	0.0435214	43.1	105	LTR/ERV1	sk	REP
ZFP69B	HERVH-int	1	7.77e-127	126.11	1	29.1	105	LTR/ERV1	sk	#N/A
ZNF394	MER4-int	2	0.000387944	3.41123	0.0853299	75.9	105	LTR/ERV1	vk	#N/A
ZNF317	LTR2	3	6.28122e-57	56.202	0.177625	29.1	105	LTR/ERV1	sk	REP
ZNF324	LTR76	2	1.00125e-39	38.9995	0.210172	75.9	105	LTR/ERV1	sk	#N/A
ZNF134	MER50	1	2.54e-40	39.5952	0.12845	43.1	105	LTR/ERV1	sk	#N/A
ZNF597	LTR43	2	3.89614e-17	16.4094	1	75.9	105	LTR/ERV1	vk	ACT
ZNF793	HERV17-int	2	7.59421e-91	90.1195	0.292354	29.1	105	LTR/ERV1	sk	REP
ZNF667	LTR12E	2	6.69654e-08	7.17415	0.74844	19.9	105	LTR/ERV1	sk	REP
ZNF510	LTR37A	1	9.75e-119	118.011	0.923872	105	105	LTR/ERV1	sk	REP
ZNF684	MER41B	1	2.19e-27	26.6596	1	75.9	105	LTR/ERV1	sk	REP
ZFP1	MER61F	2	3.56185e-06	5.44832	0.141755	43.1	105	LTR/ERV1	sk	REP
ZNF133	LTR28	1	0.0149	1.82681	0.00893791	43.1	105	LTR/ERV1	sk	#N/A
ZNF41	MER89	3	8.97598e-107	106.047	0.728495	105	105	LTR/ERV1	sk	#N/A
ZNF677	MER61E	2	6.62922e-76	75.1785	0.600531	43.1	105	LTR/ERV1	sk	REP
ZNF707	Harlequin-int	1	2.82e-13	12.5498	0.0407123	75.9	105	LTR/ERV1	sk	#N/A
ZNF669	HERV9-int	2	0	308.255	1	29.1	105	LTR/ERV1	sk	REP
ZNF418	MER72	2	0	308.255	1	43.1	105	LTR/ERV1	sk	REP
ZFP69	LTR8A	1	9.24e-10	9.03433	0.20502	43.1	105	LTR/ERV1	sk	REP
ZNF790	HERVFH21-int	1	0.00129	2.88941	0.0841978	29.1	105	LTR/ERV1	sk	#N/A
ZNF547	LTR76	2	7.18472e-42	41.1436	0.154585	75.9	105	LTR/ERV1	sk	#N/A
ZNF419	LTR76	3	2.76997e-20	19.5575	0.0754176	75.9	105	LTR/ERV1	sk	REP
ZNF485	LTR9B	1	2.58e-12	11.5884	0.0375935	43.1	105	LTR/ERV1	sk	REP
ZNF671	LTR10F	1	3.97e-60	59.4012	0.842031	29.1	105	LTR/ERV1	sk	#N/A
ZNF582	MER52A	3	0.0106115	1.97422	0.00985233	75.9	105	LTR/ERV1	sk	REP
ZNF157	PRIMAX-int	1	2.13e-07	6.67162	0.0216432	75.9	105	LTR/ERV1	sk	REP
ZNF302	LTR12C	1	0.0496	1.30452	0.00423195	19.9	105	LTR/ERV1	sk	REP
ZNF154	HERVP71A-int	1	9.81e-39	38.0083	0.457523	43.1	105	LTR/ERV1	sk	#N/A
ZNF230	MER83	1	0.00305	2.5157	0.0795472	75.9	105	LTR/ERV1	sk	REP
ZNF350	LTR12C	2	0	308.255	0.999086	19.9	105	LTR/ERV1	sk	REP
ZNF184	LTR76	2	2.23643e-10	9.65044	0.533044	75.9	105	LTR/ERV1	sk	REP
ZNF649	LTR12C	1	1.11e-07	6.95468	0.0225615	19.9	105	LTR/ERV1	sk	REP
ZNF8	LTR76	2	5.22348e-16	15.282	0.049576	75.9	105	LTR/ERV1	sk	REP
ZNF33A	MER89	3	2.92744e-172	171.534	0.553148	105	105	LTR/ERV1	sk	REP
ZNF454	LTR76	2	4.66778e-12	11.3309	0.786791	75.9	105	LTR/ERV1	sk	REP
ZNF7	MER41B	2	5.58263e-05	4.25316	0.023606	75.9	105	LTR/ERV1	sk	REP
ZNF558	MER4E1	1	2.93e-55	54.5331	0.788168	75.9	105	LTR/ERV1	sk	#N/A
ZNF569	MER51B	1	0.00425	2.37161	0.0607679	43.1	105	LTR/ERV1	sk	REP
ZNF567	LTR2	1	0.0294	1.53165	0.0069359	29.1	105	LTR/ERV1	sk	REP
ZFP82	LTR76	2	0.000733948	3.13433	0.0191815	75.9	105	LTR/ERV1	sk	REP
ZNF331	LTR76	4	1.53291e-20	19.8145	0.0642796	75.9	105	LTR/ERV1	sk	REP
ZNF354C	LOR1-int	1	2.83e-10	9.54821	0.129534	75.9	105	LTR/ERV1	sk	REP
ZNF34	LTR76	2	1.56163e-15	14.8064	0.201498	75.9	105	LTR/ERV1	sk	REP
ZNF624	LTR12C	1	0.000172	3.76447	0.117377	19.9	105	LTR/ERV1	sk	REP
ZNF850	LTR12C	1	2.34e-231	230.631	1	19.9	105	LTR/ERV1	sk	REP
ZNF420	LTR12E	1	0.0401	1.39686	0.00551282	19.9	105	LTR/ERV1	sk	REP
ZNF641	LTR12E	1	9.29e-06	5.03198	0.0704726	19.9	105	LTR/ERV1	vk	#N/A
ZNF12	MER61F	3	0.00766993	2.11521	0.00686189	43.1	105	LTR/ERV1	sk	REP
ZNF436	LTR12C	2	8.23462e-129	128.084	0.415515	19.9	159	LTR/ERV1	sk	#N/A
ZNF786	LTR71B	1	2.24e-09	8.64975	0.0848122	43.1	159	LTR/ERV1	vk	REP
ZNF263	LTR12C	8	1.83136e-274	273.737	1	19.9	159	LTR/ERV1	vk	#N/A
ZKSCAN5	HERVIP10FH-int	1	5.39e-09	8.26841	0.158167	29.1	159	LTR/ERV1	vk	#N/A
ZNF747	HUERS-P2-int	1	8.74e-06	5.05849	0.935017	43.1	159	LTR/ERV1	sk	#N/A
ZNF2	LTR12C	1	7.43e-69	68.129	0.685906	19.9	159	LTR/ERV1	sk	REP
ZKSCAN8	MER61F	2	2.1433e-08	7.66892	0.288485	43.1	159	LTR/ERV1	vk	#N/A
ZKSCAN1	LTR35A	2	6.2114e-05	4.20681	0.034946	43.1	159	LTR/ERV1	vk	#N/A
ZNF202	LTR12E	1	0.000625	3.20412	0.338669	19.9	159	LTR/ERV1	vk	#N/A
ZNF789	MER57A-int	1	1.49e-20	19.8268	0.430357	67.6	159	LTR/ERV1	sk	REP
ZNF746	MER52A	1	0.01	2	0.183197	75.9	159	LTR/ERV1	vk	#N/A
ZNF18	MER48	4	1.45622e-05	4.83677	0.0156908	29.1	312	LTR/ERV1	vk	#N/A
ZNF705D	LTR12C	1	0	308.255	1	19.9	312	LTR/ERV1	sk	#N/A
ZNF705A	LTR12C	1	0	308.255	1	19.9	312	LTR/ERV1	sk	REP
ZNF75D	HERVH-int	2	4.69281e-249	248.329	1	29.1	312	LTR/ERV1	vk	REP
ZNF705B	LTR12C	1	0	308.255	1	19.9	312	LTR/ERV1	sk	#N/A
ZNF215	LTR12C	1	0.00028	3.55284	0.32103	19.9	312	LTR/ERV1	sk	#N/A
ZNF212	HERVIP10FH-int	1	0.00136	2.86646	1	29.1	312.1	LTR/ERV1	vk	#N/A

## Sheet: LTR_ERVK
KZFP	TE_target_subfam	n_merge	merged_padj.final	minus_log10_padj	weight	Subfam_age	KZFP_age	TE_family	KRAB_type_Helleboid_2019	KRAB_type_Tycko_2020
PRDM9	HERVK9-int	1	4.21e-06	5.37572	0.0266634	29.1	0	LTR/ERVK	vk	#N/A
ZNF93	LTR13	1	0.0226	1.64589	0.00533939	19.9	9.1	LTR/ERVK	sk	#N/A
ZNF578	MER11C	1	0	308.255	1	19.9	9.1	LTR/ERVK	sk	#N/A
ZNF723	HERVK9-int	1	9.15e-56	55.0386	0.451245	29.1	15.8	LTR/ERVK	sk	REP
ZNF479	HERVK9-int	1	1.86e-14	13.7305	0.0445427	29.1	20.2	LTR/ERVK	sk	#N/A
ZNF525	MER11B	1	0	308.255	1	19.9	20.2	LTR/ERVK	sk	#N/A
ZNF727	MER11C	1	1.49e-230	229.827	1	19.9	20.2	LTR/ERVK	sk	REP
ZNF429	LTR14B	1	0.00166	2.77989	0.0194933	29.1	29.4	LTR/ERVK	sk	REP
ZNF257	LTR13	3	8.44406e-110	109.073	0.997381	19.9	29.4	LTR/ERVK	sk	REP
ZNF440	MER11A	1	0	308.255	1	29.1	29.4	LTR/ERVK	sk	REP
ZNF600	LTR13	1	0.0314	1.50307	0.00762222	19.9	29.4	LTR/ERVK	sk	#N/A
ZNF701	MER11A	2	8.25614e-85	84.0832	0.359841	29.1	29.4	LTR/ERVK	sk	#N/A
ZNF808	MER11A	1	0	308.255	1	29.1	29.4	LTR/ERVK	sk	#N/A
ZNF737	HERVK14-int	1	1.82e-33	32.7399	1	29.1	29.4	LTR/ERVK	sk	REP
ZNF626	HERVK9-int	1	2.44e-59	58.6126	1	29.1	29.4	LTR/ERVK	sk	REP
ZNF253	LTR22C	1	0	308.255	1	29.1	29.4	LTR/ERVK	sk	REP
ZNF732	LTR13	1	3.13e-122	121.504	1	19.9	29.4	LTR/ERVK	sk	REP
ZNF552	LTR14B	1	0.000604	3.21896	1	29.1	29.4	LTR/ERVK	sk	#N/A
ZNF69	LTR5_Hs	1	8.81e-101	100.055	1	0	29.4	LTR/ERVK	sk	#N/A
ZNF611	MER11D	1	0	308.255	1	19.9	29.4	LTR/ERVK	sk	REP
ZNF761	MER9a3	1	0	308.255	1	29.1	29.4	LTR/ERVK	sk	#N/A
ZNF506	LTR13	1	2.13e-12	11.6716	0.0576571	19.9	43.2	LTR/ERVK	sk	#N/A
ZNF101	HERVK11-int	1	0.00791	2.10182	0.0809181	29.1	43.2	LTR/ERVK	sk	REP
ZNF695	LTR13	1	0.00167	2.77728	0.0394283	19.9	43.2	LTR/ERVK	sk	REP
ZNF736	MER11D	1	9.86e-62	61.0061	0.189948	19.9	43.2	LTR/ERVK	sk	REP
ZNF680	LTR13	4	1.96185e-180	179.707	0.564751	19.9	43.2	LTR/ERVK	sk	REP
ZNF708	MER11A	2	4.8809e-06	5.3115	0.0485813	29.1	43.2	LTR/ERVK	sk	#N/A
ZNF595	MER11A	1	2.14e-16	15.6696	0.273448	29.1	43.2	LTR/ERVK	sk	#N/A
ZNF141	LTR13	1	3.39e-10	9.4698	0.073704	19.9	43.2	LTR/ERVK	sk	REP
ZNF17	HERVK-int	1	0.00033	3.48149	0.0112942	29.1	43.2	LTR/ERVK	sk	REP
ZNF714	HERVK22-int	1	5.66e-35	34.2472	1	43.1	43.2	LTR/ERVK	sk	#N/A
ZNF880	HERVK3-int	1	0.0174	1.75945	0.0575043	29.1	43.2	LTR/ERVK	sk	#N/A
ZNF679	LTR14B	1	3.22e-28	27.4921	0.0891865	29.1	43.2	LTR/ERVK	sk	#N/A
ZNF528	LTR13	4	1.8578e-11	10.731	0.0348121	19.9	43.2	LTR/ERVK	sk	REP
ZNF124	LTR13	1	4.53e-87	86.3439	0.280106	19.9	43.2	LTR/ERVK	sk	REP
ZNF254	LTR22A	1	1.71e-36	35.767	0.116031	43.1	43.2	LTR/ERVK	sk	REP
ZNF749	LTR3B	1	6.01e-17	16.2211	1	29.1	43.2	LTR/ERVK	sk	#N/A
ZNF778	LTR13	2	5.73859e-74	73.2412	0.2376	19.9	74	LTR/ERVK	sk	REP
ZNF417	HERVK9-int	1	1.15e-34	33.9393	0.710704	29.1	74	LTR/ERVK	sk	REP
ZNF587	HERVK-int	2	2.1064e-19	18.6765	0.505266	29.1	74	LTR/ERVK	sk	#N/A
ZNF780A	HERVK22-int	1	0.0105	1.97881	0.00723118	43.1	74	LTR/ERVK	sk	#N/A
ZNF433	MER11A	1	0	308.255	1	29.1	74	LTR/ERVK	sk	REP
ZNF320	LTR14A	3	0	308.255	1	29.1	76	LTR/ERVK	sk	#N/A
ZNF28	LTR14	1	5e-73	72.301	0.524901	29.1	76	LTR/ERVK	sk	#N/A
ZNF468	MER11A	1	0	308.255	1	29.1	76	LTR/ERVK	sk	#N/A
ZNF563	MER11A	2	0.00563223	2.24932	0.0295031	29.1	76	LTR/ERVK	sk	REP
ZNF799	LTR13	1	0.00711	2.14813	0.00786861	19.9	76	LTR/ERVK	sk	REP
ZNF443	LTR13	1	0	308.255	1	19.9	76	LTR/ERVK	sk	REP
ZNF878	MER11A	1	0.000806	3.09366	0.17392	29.1	76	LTR/ERVK	sk	REP
ZNF266	LTR3B	2	0.000608164	3.21598	0.0200609	29.1	90	LTR/ERVK	sk	#N/A
ZNF573	LTR22A	1	0.000156	3.80688	0.0523861	43.1	96	LTR/ERVK	sk	REP
ZNF30	LTR13	5	3.93165e-22	21.4054	0.0694407	19.9	96	LTR/ERVK	sk	REP
ZNF596	LTR13	1	7.34e-05	4.1343	0.995339	19.9	96	LTR/ERVK	sk	REP
ZNF37A	MER11B	2	5.97942e-15	14.2233	0.0461415	19.9	96	LTR/ERVK	sk	REP
ZNF549	MER11A	3	7.19614e-57	56.1429	0.180695	29.1	96	LTR/ERVK	sk	REP
ZIM3	LTR3B	2	8.51309e-05	4.06991	0.0132031	29.1	96	LTR/ERVK	sk	REP
ZNF534	LTR14A	1	4.33e-07	6.36351	0.0206437	29.1	96	LTR/ERVK	sk	REP
ZNF425	LTR13	1	6.73e-11	10.172	0.100503	19.9	96	LTR/ERVK	vk	REP
ZNF792	LTR22A	2	0.000506395	3.29551	0.0118028	43.1	96	LTR/ERVK	sk	REP
ZNF586	MER11B	2	1.37502e-07	6.86169	0.0222598	19.9	96	LTR/ERVK	sk	REP
ZNF554	MER11A	3	3.84557e-79	78.415	1	29.1	105	LTR/ERVK	sk	REP
ZNF585A	MER11A	1	0.0366	1.43652	0.0384292	29.1	105	LTR/ERVK	sk	REP
ZNF222	HERVK3-int	1	0.0446	1.35067	0.0623183	29.1	105	LTR/ERVK	sk	REP
ZNF606	HERVK14-int	1	0.000296	3.52871	0.0807741	29.1	105	LTR/ERVK	sk	REP
ZNF674	HERVK13-int	1	0.0019	2.72125	0.114639	19.9	105	LTR/ERVK	sk	REP
ZNF140	MER11A	2	1.16756e-15	14.9327	0.0553701	29.1	105	LTR/ERVK	sk	REP
ZNF224	MER11A	2	4.41934e-05	4.35464	0.0135068	29.1	105	LTR/ERVK	sk	REP
ZNF283	MER9a1	1	7.88e-05	4.10347	0.013312	19.9	105	LTR/ERVK	sk	REP
ZNF605	LTR14B	1	0.00014	3.85387	0.0202362	29.1	105	LTR/ERVK	sk	REP
ZNF382	LTR13	7	6.29137e-76	75.2013	0.243958	19.9	105	LTR/ERVK	sk	REP
ZNF445	MER11A	1	0.0141	1.85078	0.0454397	29.1	105	LTR/ERVK	sk	REP
ZFP57	LTR13	3	6.03766e-06	5.21913	0.016143	19.9	105	LTR/ERVK	sk	REP
ZNF264	MER11A	2	5.03212e-20	19.2982	0.0626049	29.1	105	LTR/ERVK	sk	REP
ZNF251	LTR13	1	6.3e-29	28.2007	0.0914849	19.9	105	LTR/ERVK	sk	REP
ZNF317	LTR13	3	1.98923e-05	4.70132	0.0148584	19.9	105	LTR/ERVK	sk	REP
ZNF324	MER11A	2	1.99347e-118	117.7	0.634298	29.1	105	LTR/ERVK	sk	#N/A
ZNF134	LTR13	1	1.7e-16	15.7696	0.0511575	19.9	105	LTR/ERVK	sk	#N/A
ZNF793	LTR14B	2	9.11639e-30	29.0402	0.0942084	29.1	105	LTR/ERVK	sk	REP
ZNF667	LTR13	2	5.51815e-08	7.25821	0.75721	19.9	105	LTR/ERVK	sk	REP
ZNF684	MER11B	1	2.74e-05	4.56225	0.17113	19.9	105	LTR/ERVK	sk	REP
ZFP1	LTR22	2	0.0131127	1.88231	0.0489739	29.1	105	LTR/ERVK	sk	REP
ZNF133	MER11A	1	3.02e-09	8.51999	0.0416851	29.1	105	LTR/ERVK	sk	#N/A
ZNF41	MER11A	3	3.71478e-128	127.43	0.875388	29.1	105	LTR/ERVK	sk	#N/A
ZNF677	MER11B	2	8.74158e-21	20.0584	0.160228	19.9	105	LTR/ERVK	sk	REP
ZNF669	MER11A	2	1.35847e-76	75.867	0.246118	29.1	105	LTR/ERVK	sk	REP
ZNF418	MER11A	2	0.00154971	2.80975	0.00911503	29.1	105	LTR/ERVK	sk	REP
ZNF547	MER11A	2	1.96547e-71	70.7065	0.265659	29.1	105	LTR/ERVK	sk	#N/A
ZNF419	HERVK22-int	3	4.75269e-260	259.323	1	43.1	105	LTR/ERVK	sk	REP
ZNF485	MER11C	1	0.0356	1.44855	0.0046992	19.9	105	LTR/ERVK	sk	REP
ZNF230	LTR13	1	4.67e-26	25.3307	0.800964	19.9	105	LTR/ERVK	sk	REP
ZNF184	MER11A	2	1.52618e-12	11.8164	0.652681	29.1	105	LTR/ERVK	sk	REP
ZNF8	MER11A	2	3.01672e-22	21.5205	0.0698139	29.1	105	LTR/ERVK	sk	REP
ZNF33A	MER11A	3	0	308.255	0.994036	29.1	105	LTR/ERVK	sk	REP
ZNF454	MER11A	2	3.96822e-15	14.4014	1	29.1	105	LTR/ERVK	sk	REP
ZNF7	LTR13	2	0.00220883	2.65584	0.0147405	19.9	105	LTR/ERVK	sk	REP
ZFP82	MER11A	2	0.000470305	3.32762	0.0203644	29.1	105	LTR/ERVK	sk	REP
ZNF331	MER11A	4	2.02952e-33	32.6926	0.106057	29.1	105	LTR/ERVK	sk	REP
ZNF34	MER11A	2	1.9193e-10	9.71686	0.132235	29.1	105	LTR/ERVK	sk	REP
RBAK	LTR13	1	0.0443	1.3536	0.0982111	19.9	105	LTR/ERVK	sk	REP
ZNF891	LTR14B	1	0.0096	2.01773	0.0703433	29.1	105	LTR/ERVK	sk	REP
ZNF12	LTR22	3	0.000704081	3.15238	0.0102265	29.1	105	LTR/ERVK	sk	REP
ZKSCAN5	LTR14B	1	0.000119	3.92445	0.075071	29.1	159	LTR/ERVK	vk	#N/A
ZNF2	LTR13	1	4.71e-100	99.327	1	19.9	159	LTR/ERVK	sk	REP
ZKSCAN8	LTR22B	2	8.16225e-05	4.08819	0.153787	29.1	159	LTR/ERVK	vk	#N/A
ZNF18	LTR13	4	1.21764e-30	29.9145	0.0970447	19.9	312	LTR/ERVK	vk	#N/A
ZNF705A	LTR13	1	8.24e-05	4.08407	0.013249	19.9	312	LTR/ERVK	sk	REP

## Sheet: Retroposon_SVA
KZFP	TE_target_subfam	n_merge	merged_padj.final	minus_log10_padj	weight	Subfam_age	KZFP_age	TE_family	KRAB_type_Helleboid_2019	KRAB_type_Tycko_2020
ZNF90	SVA_D	1	1.98e-08	7.70333	0.0454009	15.8	9.1	Retroposon/SVA	sk	REP
ZNF587B	SVA_F	1	3.41e-16	15.4672	1	0	9.1	Retroposon/SVA	sk	REP
ZNF723	SVA_F	1	0.0368	1.43415	0.0117582	0	15.8	Retroposon/SVA	sk	REP
ZNF257	SVA_A	3	1.34676e-109	108.871	0.995527	19.9	29.4	Retroposon/SVA	sk	REP
ZNF813	SVA_F	1	8.08e-27	26.0926	0.244687	0	29.4	Retroposon/SVA	sk	#N/A
ZNF57	SVA_F	1	2.89e-15	14.5391	1	0	29.4	Retroposon/SVA	sk	REP
ZNF611	SVA_A	1	0	308.255	1	19.9	29.4	Retroposon/SVA	sk	REP
ZNF736	SVA_D	1	4.53e-15	14.3439	0.044661	15.8	43.2	Retroposon/SVA	sk	REP
ZNF141	SVA_B	1	8.96e-110	109.048	0.848725	15.8	43.2	Retroposon/SVA	sk	REP
ZNF528	SVA_D	4	8.81998e-06	5.05453	0.0163973	15.8	43.2	Retroposon/SVA	sk	REP
ZNF347	SVA_D	1	3.14e-06	5.50307	0.0178523	15.8	43.2	Retroposon/SVA	sk	REP
ZNF14	SVA_F	1	1.04e-19	18.983	1	0	43.2	Retroposon/SVA	sk	REP
ZNF136	SVA_D	3	9.09146e-07	6.04137	0.0195986	15.8	74	Retroposon/SVA	sk	REP
ZNF780A	SVA_D	1	1.09e-25	24.9626	0.0912209	15.8	74	Retroposon/SVA	sk	#N/A
ZNF28	SVA_D	1	1.81e-138	137.742	1	15.8	76	Retroposon/SVA	sk	#N/A
ZNF468	SVA_A	1	9.51e-06	5.02182	0.0162911	19.9	76	Retroposon/SVA	sk	#N/A
ZNF878	SVA_F	1	1.63e-18	17.7878	1	0	76	Retroposon/SVA	sk	REP
ZNF415	SVA_D	1	5.69e-09	8.24489	1	15.8	90	Retroposon/SVA	sk	#N/A
ZNF519	SVA_C	1	1.16e-09	8.93554	0.0289875	15.8	96	Retroposon/SVA	sk	REP
ZNF573	SVA_D	1	4.67e-05	4.33068	0.0595942	15.8	96	Retroposon/SVA	sk	REP
ZNF30	SVA_D	5	1.93517e-09	8.71328	0.0282665	15.8	96	Retroposon/SVA	sk	REP
ZNF556	SVA_D	1	5.4e-12	11.2676	1	15.8	96	Retroposon/SVA	sk	REP
ZNF334	SVA_D	2	0.00113996	2.94311	0.00971474	15.8	105	Retroposon/SVA	sk	REP
ZNF554	SVA_F	3	8.25445e-07	6.08331	0.0775784	0	105	Retroposon/SVA	sk	REP
ZNF140	SVA_B	2	4.45725e-05	4.35093	0.0161331	15.8	105	Retroposon/SVA	sk	REP
ZNF605	SVA_D	1	1.04e-39	38.983	0.204694	15.8	105	Retroposon/SVA	sk	REP
ZNF461	SVA_D	1	2.94e-276	275.532	1	15.8	105	Retroposon/SVA	sk	REP
ZFP57	SVA_D	3	6.98827e-210	209.156	0.646927	15.8	105	Retroposon/SVA	sk	REP
ZNF264	SVA_D	2	4.19991e-109	108.377	0.351582	15.8	105	Retroposon/SVA	sk	REP
ZNF597	SVA_F	2	0.00330954	2.48023	0.151147	0	105	Retroposon/SVA	vk	ACT
ZNF41	SVA_F	3	9.93848e-51	50.0027	0.343496	0	105	Retroposon/SVA	sk	#N/A
ZNF649	SVA_D	1	1.3e-61	60.8861	0.197519	15.8	105	Retroposon/SVA	sk	REP
ZNF33A	SVA_D	3	5.00657e-208	207.3	0.668486	15.8	105	Retroposon/SVA	sk	REP
ZNF558	SVA_D	1	4.11e-25	24.3862	0.352453	15.8	105	Retroposon/SVA	sk	#N/A
ZNF624	SVA_D	1	8.48e-33	32.0716	1	15.8	105	Retroposon/SVA	sk	REP
ZNF641	SVA_D	1	3.95e-72	71.4034	1	15.8	105	Retroposon/SVA	vk	#N/A
ZNF256	SVA_D	1	6.91e-19	18.1605	1	15.8	105	Retroposon/SVA	sk	REP
ZNF155	SVA_F	1	1.99e-06	5.70115	1	0	105	Retroposon/SVA	sk	REP
ZNF227	SVA_D	1	7.62e-05	4.11805	1	15.8	105	Retroposon/SVA	sk	#N/A
ZNF436	SVA_D	2	6.86409e-108	107.163	0.347646	15.8	159	Retroposon/SVA	sk	#N/A
ZNF263	SVA_D	8	6.73024e-173	172.172	0.628968	15.8	159	Retroposon/SVA	vk	#N/A
ZKSCAN5	SVA_D	1	2.53e-22	21.5969	0.413128	15.8	159	Retroposon/SVA	vk	#N/A
ZNF747	SVA_D	1	3.89e-06	5.41005	1	15.8	159	Retroposon/SVA	sk	#N/A
ZNF202	SVA_F	1	3.46e-10	9.46092	1	0	159	Retroposon/SVA	vk	#N/A
ZNF746	SVA_F	1	1.21e-11	10.9172	1	0	159	Retroposon/SVA	vk	#N/A
ZNF500	SVA_F	1	1.43e-21	20.8447	1	0	159	Retroposon/SVA	vk	#N/A
ZNF852	SVA_F	1	0.000147	3.83268	1	0	159	Retroposon/SVA	vk	#N/A
ZNF705D	SVA_D	1	0	308.255	1	15.8	312	Retroposon/SVA	sk	#N/A
ZNF705A	SVA_D	1	0	308.255	1	15.8	312	Retroposon/SVA	sk	REP
ZNF705B	SVA_D	1	0	308.255	1	15.8	312	Retroposon/SVA	sk	#N/A
ZNF215	SVA_F	1	8.57e-12	11.067	1	0	312	Retroposon/SVA	sk	#N/A
ZNF705E	SVA_D	1	4.79e-201	200.32	1	15.8	312	Retroposon/SVA	sk	#N/A
ZNF282	SVA_D	2	7.51012e-87	86.1244	1	15.8	312.1	Retroposon/SVA	vk	#N/A
