# Supplementary material for: Genetic features and genomic targets of human KRAB-zinc finger proteins
Source: PubMed Central journal article supplement (PMC10547255; doi:10.1101/gr.277722.123), 2023-08
Supplement: Supplemental_Material.pdf [file Supplemental_Material.pdf]

## Contents

### Supplementary Figures

Figure S1: Age and polymorphism of KZFPs in clusters

Figure S2: Variable constraint within each KZFP cluster

Figure S3: Comparison of ZNF160 and ZNF665 paralogs

Figure S4: Replicate comparison

Figure S5: Targets of human KZFPs, external data

Figure S6: Example of Primary vs. Secondary targets

Figure S7: ZNF141 is binding to SVA VNTR

Figure S8: Evolutionary history of paralogs and additional examples of shared targets

Figure S9: Impact of multi-mapped reads on peak calling and target enrichment

### Supplementary Methods

Cross-species zinc fingerprint comparison

### Supplementary Tables (S1-S4: .xlsx files)

Table S1: Census of human KZFPs

Table S2: ChIP-seq data on human KZFPs

Table S3: Primary targets of KZFPs

Table S4: KZFP and TE age comparison

### Supplementary References

## Supplementary Figures

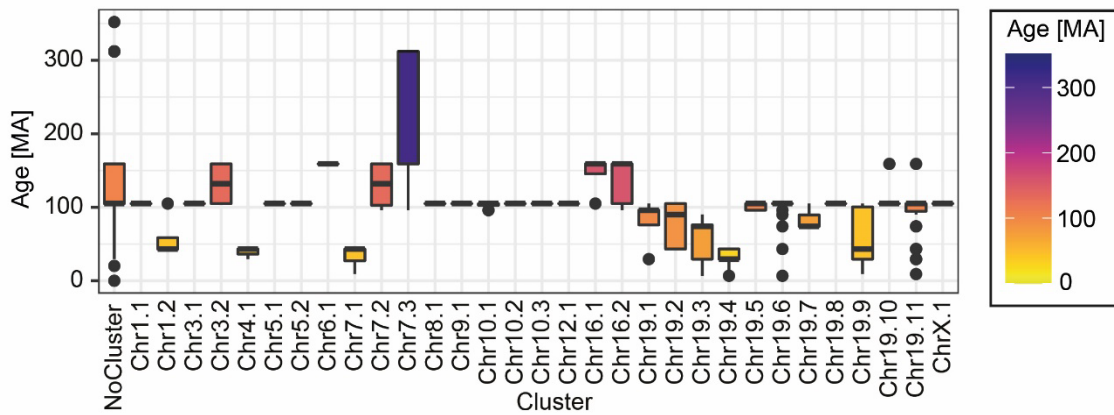

**Figure S1: Age and polymorphism of KZFPs in clusters**

Boxplots of the ages per cluster as defined in Figure 1, colored by the median age of the KZFPs in the clusters.

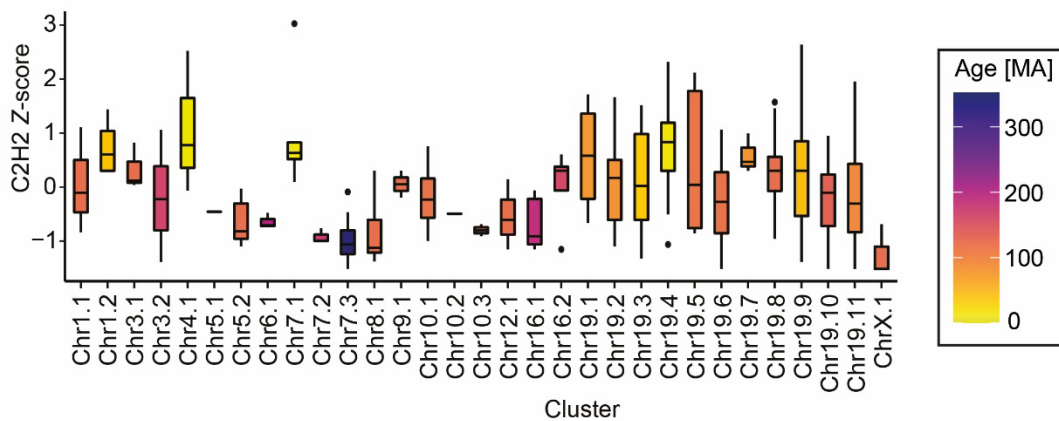

**Figure S2: Variable constraint within each KZFP cluster**

Boxplots of the variable levels of constraint in the cysteine and histidine (C2H2) levels across KZFP clusters, colored by the mean age of the KZFPs within each genomic cluster.

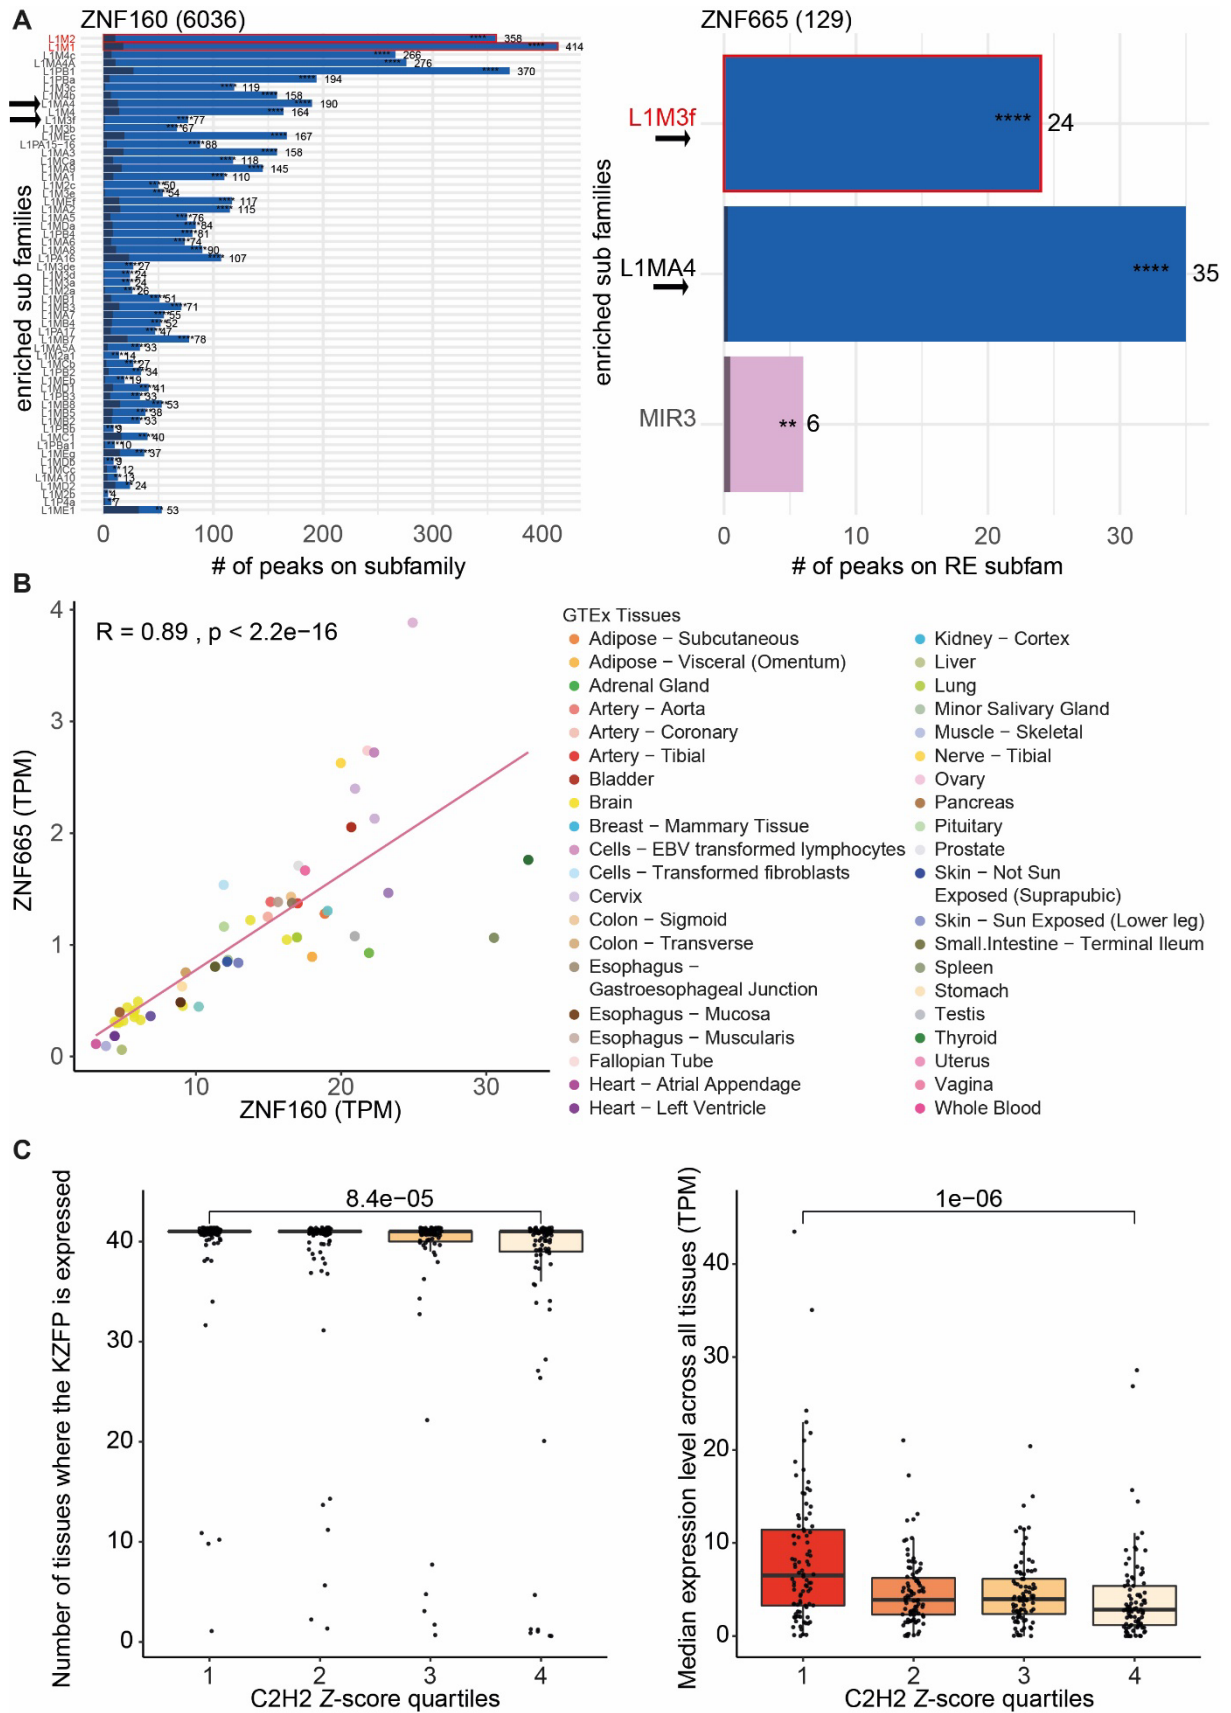

**Figure S3: Comparison of ZNF160 and ZNF665 paralogs**

A) Similar genomic targets for ZNF160 and ZNF665. Enrichments of ZNF160 and ZNF665 peaks over different repetitive element subfamilies (FDR < 0.01). The width of the colored bars represents the number of peaks per subfamily also shown as a number on the right of the bar. The black transparent bars represent the expected number of peaks following a random distribution. The FDR of the enrichment is shown with stars (FDR < 0.0001 = \*\*\*\*, < 0.001=\*\*\*, < 0.01=\*\*, < 0.05=\*, >= 0.05 = n.s). The y-axis is ordered by FDR. The number next to the title indicates the total number of peaks for the experiment. Primary targets for each KZFP are highlighted in red. (B) Expression levels in transcripts per million (TPM) of ZNF160 and ZNF665 across all tissues depicted in GTEx (GTEx Consortium 2017). (C) Biological consequences of KZFP constraint. Left: KZFPs in the highest quartile of C2H2 constraint are expressed in more tissues than KZFPs in the lowest quartile. Right: The mean expression levels of KZFPs in the first quartile of C2H2 constraint is higher than for those KZFPs in the fourth constraint quartile (lowest constraint). All p-values are from Wilcoxon rank sum tests.

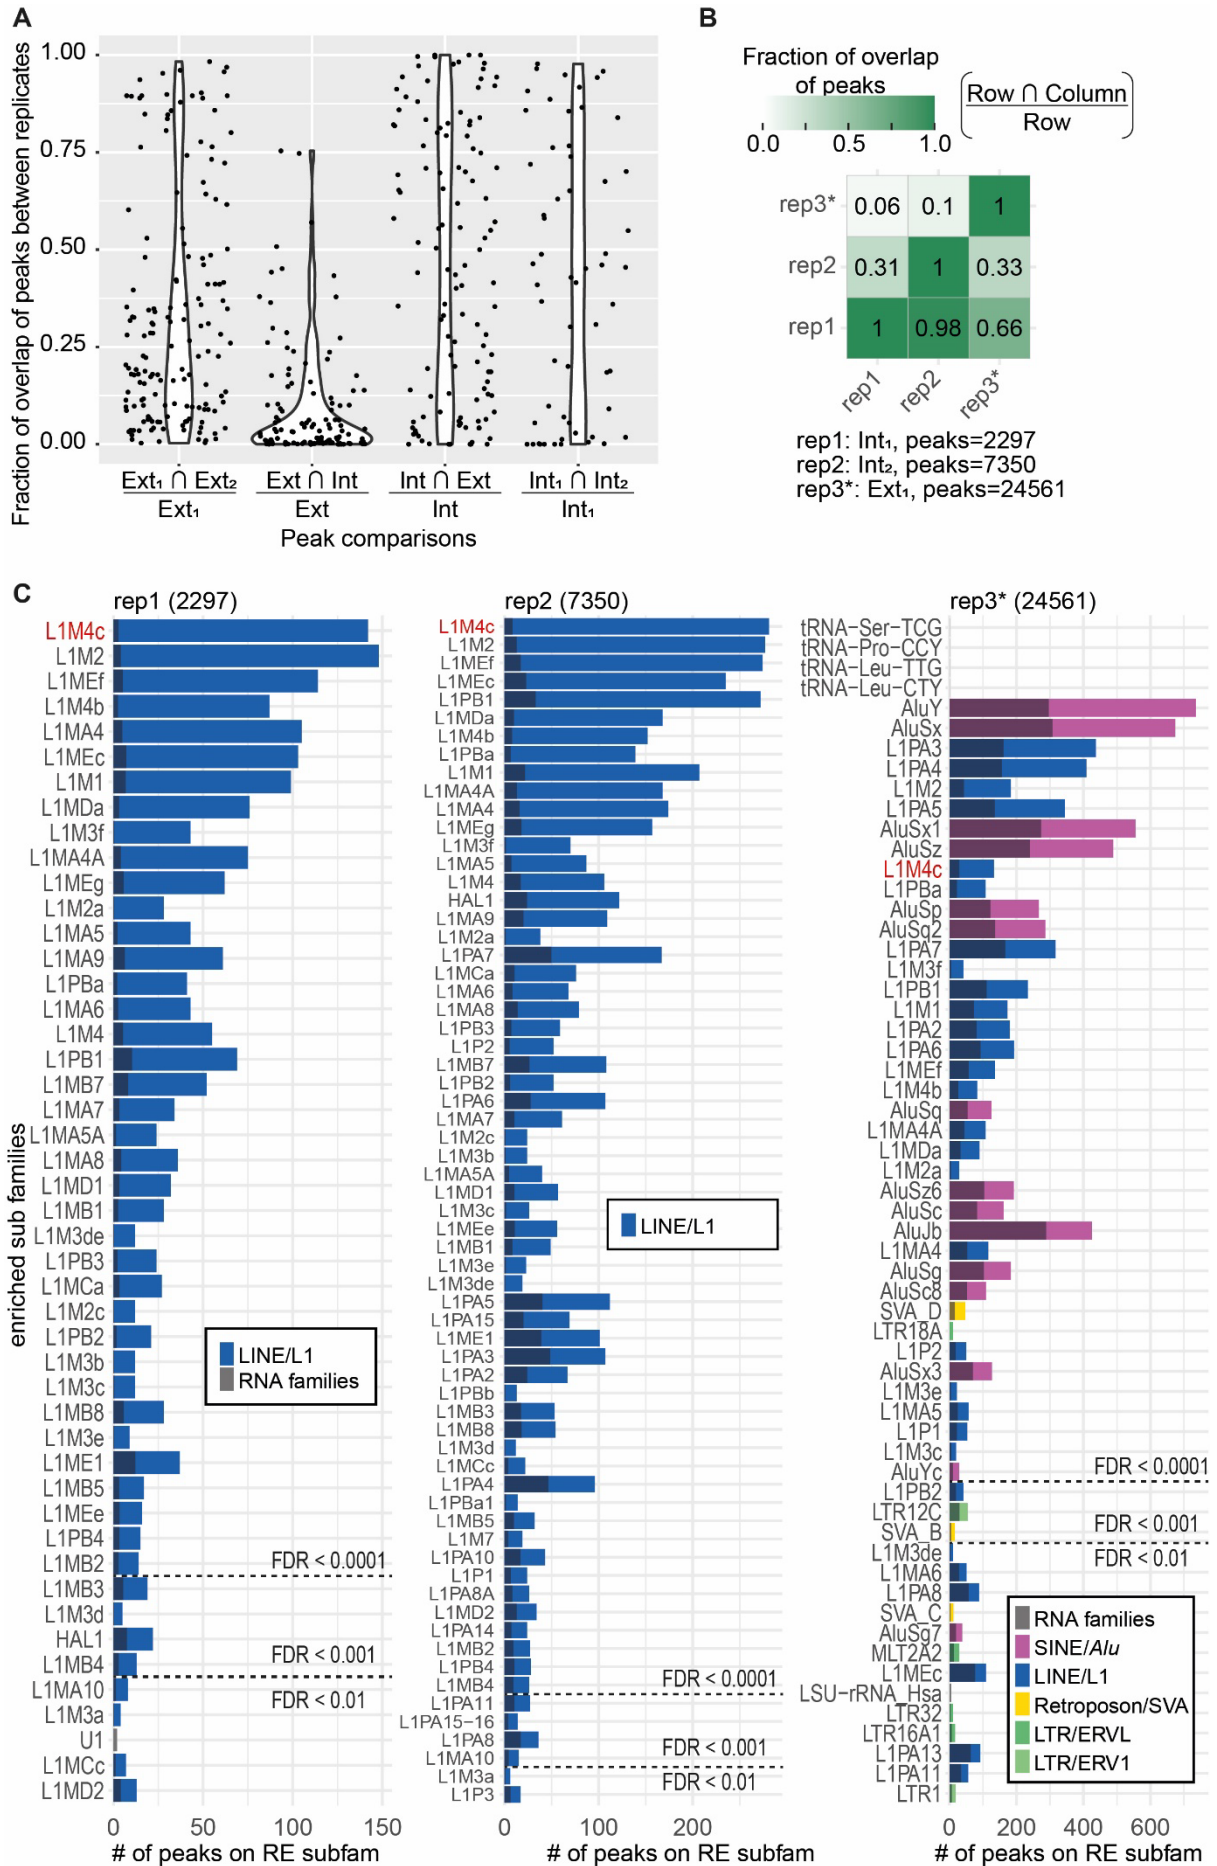

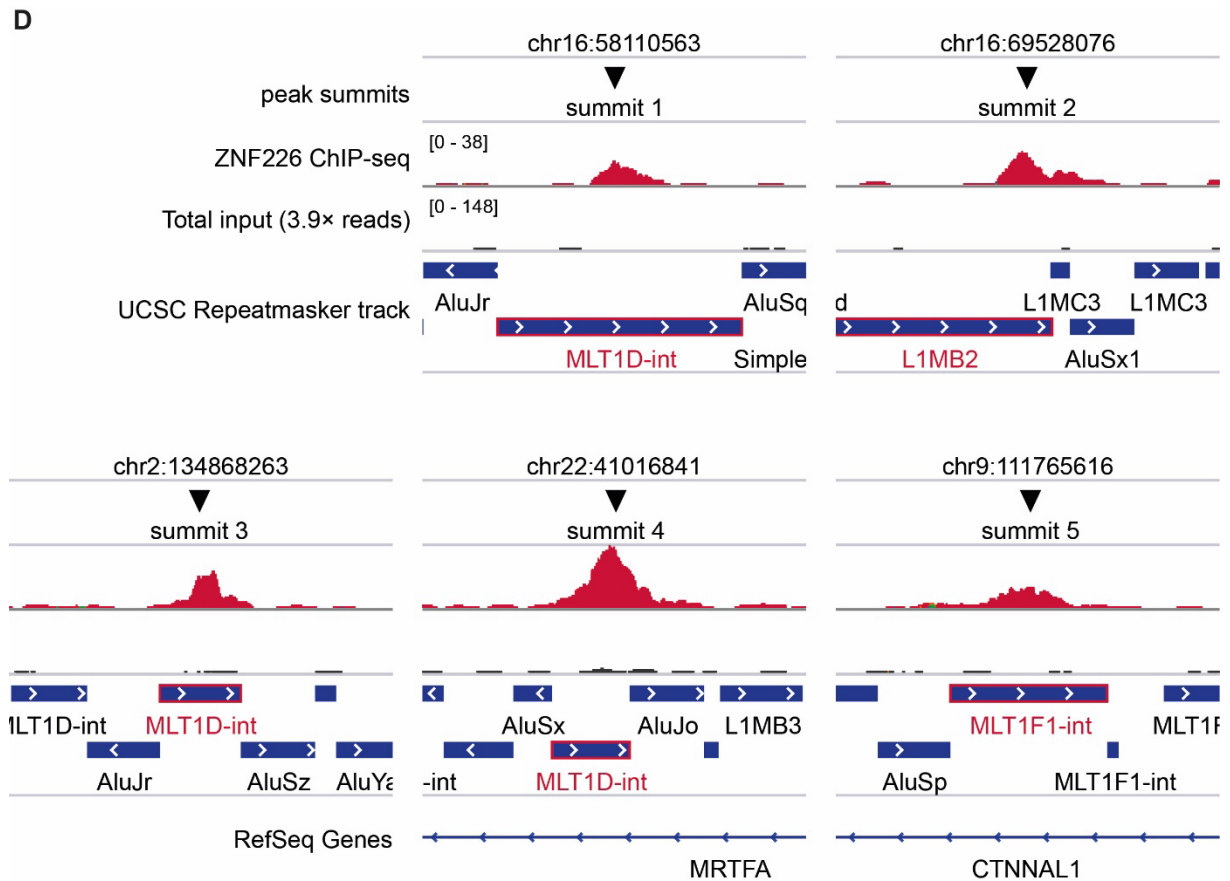

### Figure S4: Replicate comparison

A) Violine plots with comparisons of the fraction of overlap of all ChIP-seq and ChIP-exo experiments with replicates; between internal (Int) experiments performed and analyzed as described in the Methods section and external (Ext) datasets with heterogenous experimental and analysis procedures. Each dot represents a comparison of the peaks in two experiments performed on the same KZFP. The different comparisons from left to right are: 1) Comparisons between external datasets, 2) comparisons between external and internal datasets (i.e., what fraction of peaks from external dataset can be found in internal replicates), 3) comparisons between internal and external datasets (i.e., what fraction of peaks from internal dataset can be found in external replicates) and 4) comparisons between internal replicates. B) Example of peak comparisons across replicates for ZNF136. A matrix showing the fraction of overlap of peaks between different experiments for ZNF136 on the rows with the columns. Experiments are indicated below as either being internal (Int) or external (Ext) as well as the number of

peaks per experiment. Rep1 is a new dataset generated in for this paper, rep2 was previously generated together with the data published in (Imbeault et al. 2017) but not published at the time, rep3 is an external dataset (marked with a star) generated and analyzed by (Schmitges et al. 2016). C) Enrichments of ZNF136 rep1, rep2 and rep3 over different repetitive element subfamilies (FDR < 0.01). The positions of L1M4c are highlighted in red. The width of the colored bars represents the number of peaks per subfamily. The black transparent bars represent the expected number of peaks following a random distribution. The areas on the plots with different FDRs of the enrichment are delineated with dashed lines. The y-axis is ordered by FDR. The number next to the title indicates the total number of peaks for the experiment. D) Genome browser tracks from all five peaks for ZNF226. Shown from top to bottom are: the summits of the peaks called peaks, the ChIP-seq signal, the total input signal (with the data range increased 3.9× as the input has 3.9× more reads than ZNF226 with 55 mio. compared to 14 mio. reads), the UCSC Repeatmasker track with the TE overlapping the summit highlighted in red and the RefSeq Genetrack.



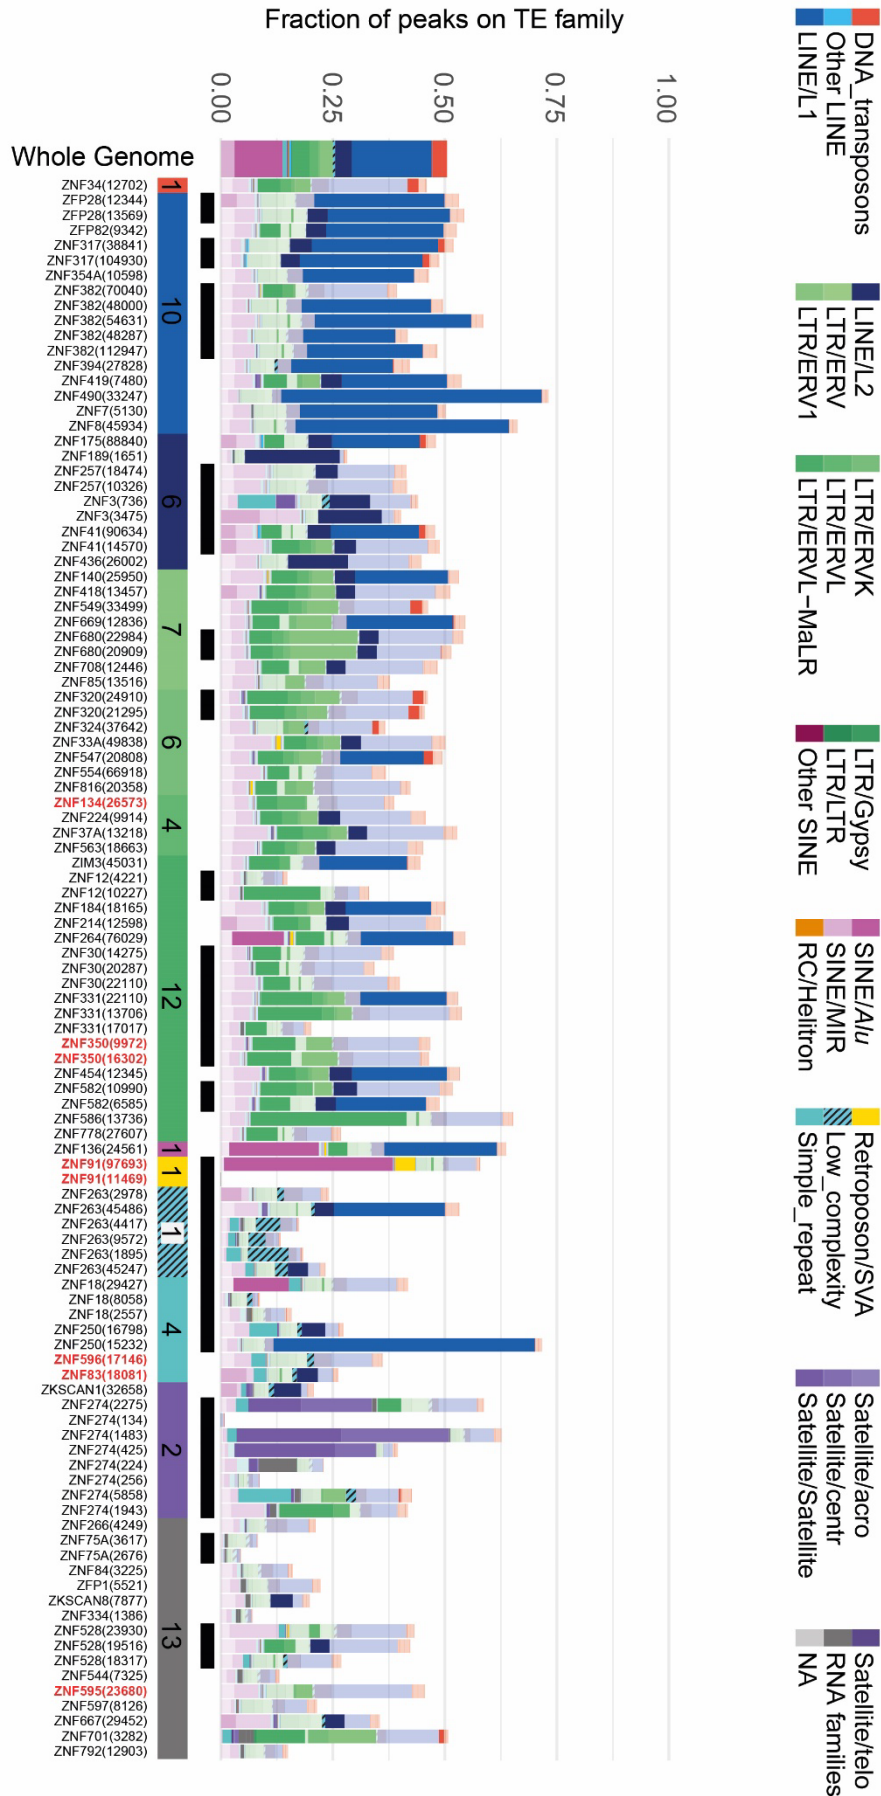



**Figure S5: Targets of human KZFPs, external data**

Bar graph showing the fraction of peaks over repetitive element (RE) families for experiments conducted using different over-expression protocols (Table S2). Columns are ordered by the most enriched family which are indicated by the horizontal bar below, along with the number of KZFPs for each category. Replicate experiments are indicated by black squares above the horizontal bar. Significant enrichments ( $FDR < 0.05$ ) are show in fully opaque colors where non-significant enrichments are transparent. The leftmost bar shows the genome occupancy of all RE families. The total number of peaks per experiment is indicated in brackets after the KZFP name below each bar. KZFPs that are not represented in Figure 5A are highlighted in red.

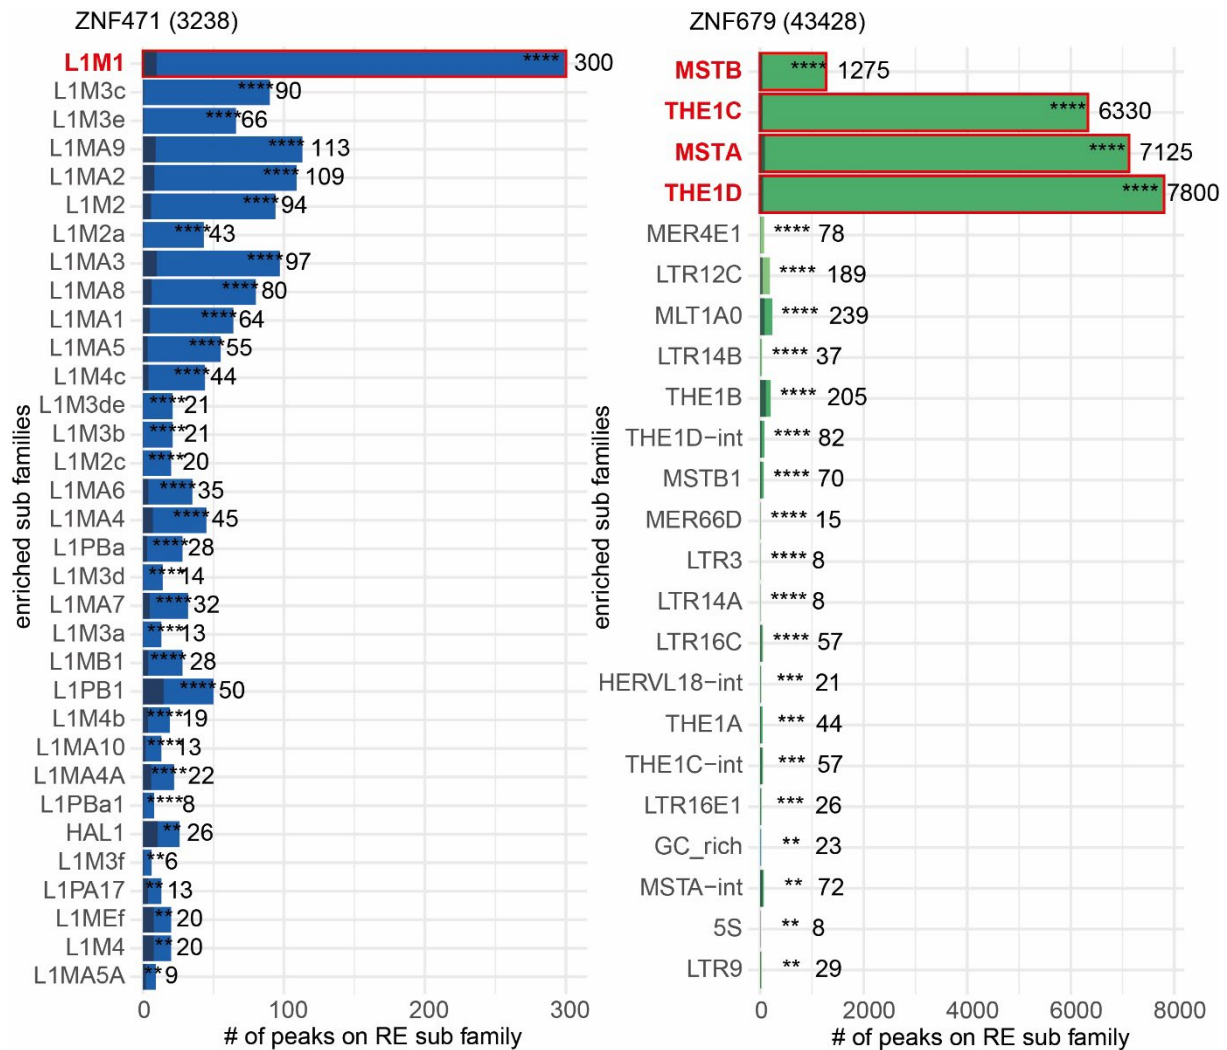

**Figure S6: Example of Primary vs. Secondary targets**

Enrichments of ZNF471 and ZNF679 peaks over different repetitive element subfamilies (FDR < 0.01). Primary targets for each KZFP are highlighted in red. The width of the colored bars represents the number of peaks per subfamily also shown as a number on the right of the bar. The black transparent bars represent the expected number of peaks following a random distribution. The FDR of the enrichment is shown with stars (FDR < 0.0001 = \*\*\*\*, < 0.001=\*\*\*, < 0.01=\*\*, < 0.05=\*, >= 0.05 = n.s). The y-axis is ordered by FDR. The number next to the title indicates the total number of peaks for the experiment.

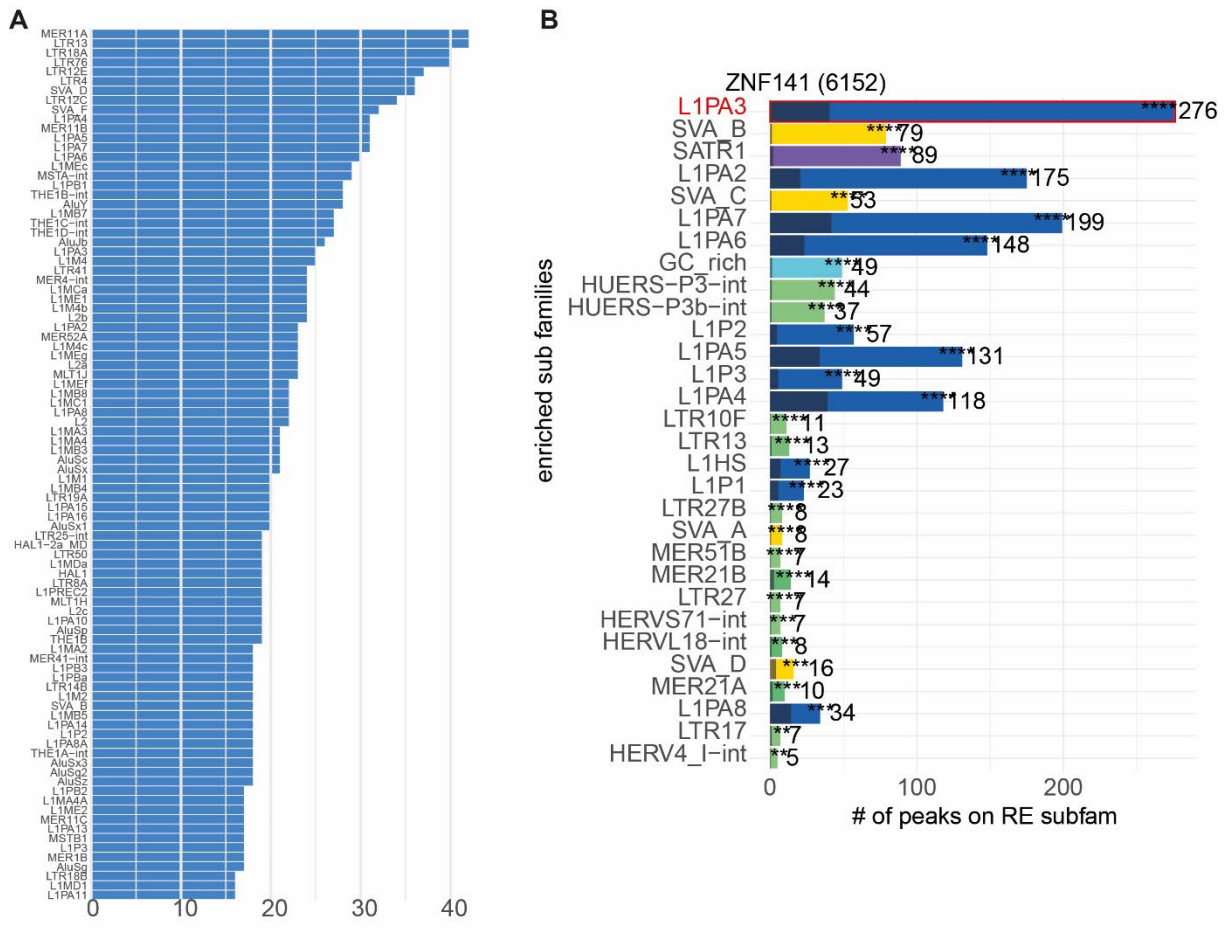

**Figure S7: ZNF141 is binding to SVA VNTR**

A) Bar graph with the number of KZFPs enriched on TE subfamilies (rows). TE subfamilies with more than 15 enriched KZFPs with an FDR < 0.05 are shown. B) Enrichment of ZNF141 peaks over different repetitive element subfamilies (FDR < 0.01). The width of the colored bars represents the number of peaks per subfamily also shown as a number on the right of the bar. The black transparent bars represent the expected number of peaks following a random distribution. The FDR of the enrichment is shown with stars (FDR < 0.0001 = \*\*\*\*, < 0.001=\*\*\*, < 0.01=\*\*, < 0.05=\*, >= 0.05 = n.s). The y-axis is ordered by FDR. The number next to the title indicates the total number of peaks for the experiment. C) Multiple sequence alignment (MSA) over the most enriched targets L1PA2 and 3 (top) and SVA\_B and C in (bottom). Up to 200 elements for the indicated targets were aligned, selecting first elements overlapping with a peak and then the longest elements. The signal of the ZNF141 ChIP was laid over the alignment in purple. The locations of the motif identified in (Weirauch et al. 2014) is shown in red. The motif is shown on the right of the top panel. The average signal normalized for each element (row-wise) can be seen as a line plot above the MSA plots.

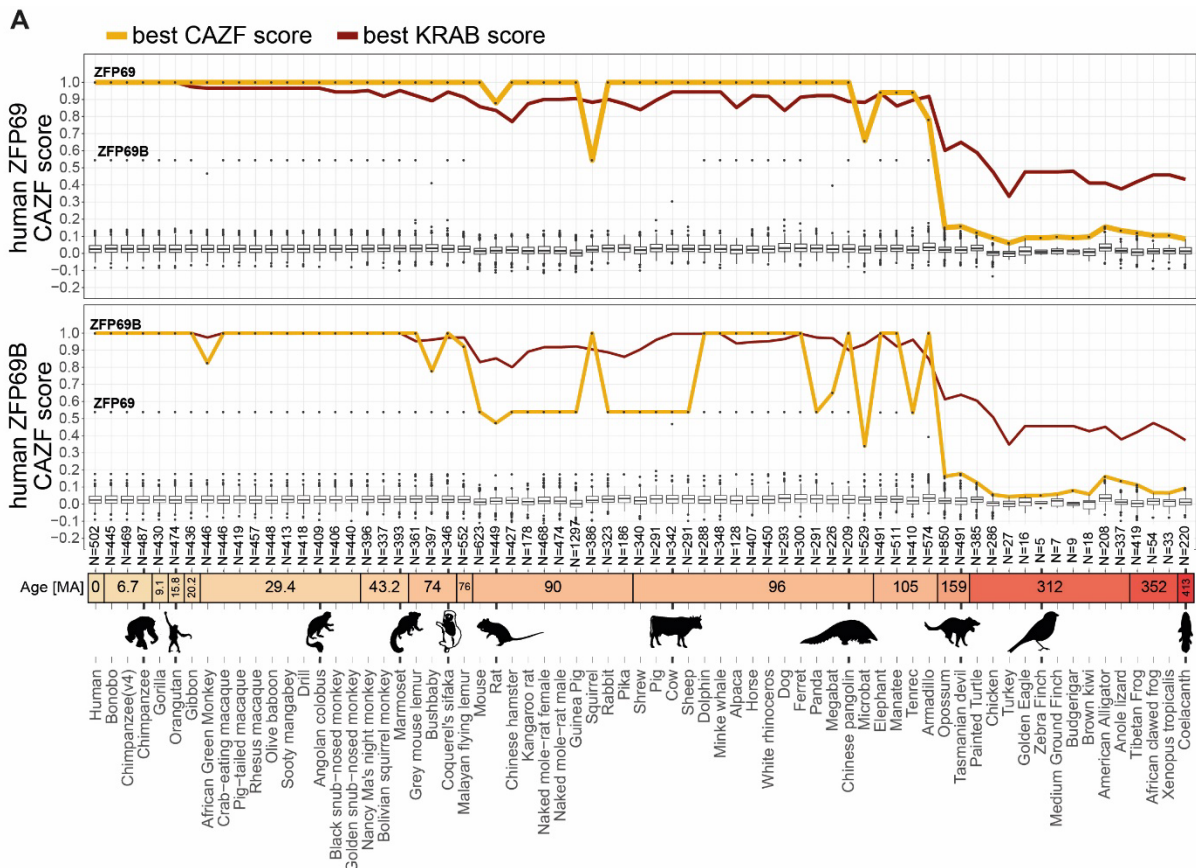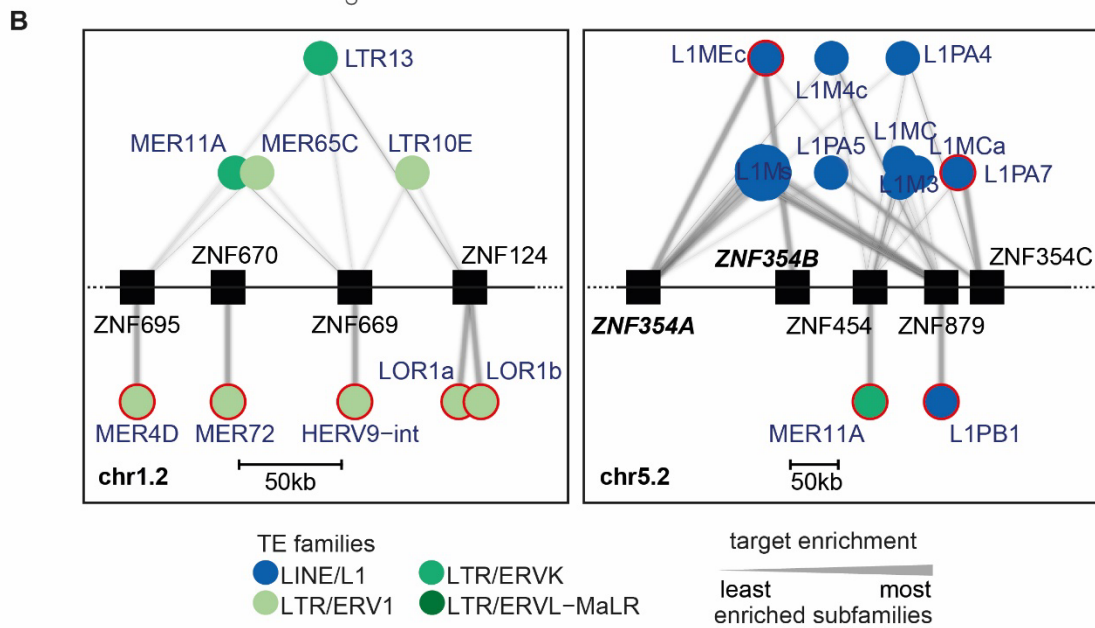

## Figure S8: Evolutionary history of paralogs and additional examples of shared targets

A) Cross-species sequence comparison of ZFP69 (top) and ZFP69B (bottom). The alignment scores (see supplementary methods) between the zinc fingerprints of human ZFP69 or ZFP69B and all KZFPs of the indicated species are shown as boxplots. The dots corresponding to the best alignment score for each species are connected with a yellow line. Alignments were also done for the KRAB domain, but only the best alignments joined by a red line are shown. The number of identified potential non curated KZFPs (N), as well as the time of divergence (Age), for each species is indicated below. Silhouettes courtesy of <http://phylopic.org/>. B) Networks for clusters chr1.2 and chr5.2 were targets (circles) of each KZFP (squares) are shown as connected edges and the amount of binding is represented by the line thickness. The thickest line for each KZFP represents the TE subfamily with the highest  $-\log_{10}(\text{FDR})$  and then scales linearly to the lowest value. For visibility, only the best targets (below) and shared targets (above) are shown. The TE subfamilies are colored according to their families. Primary targets for each KZFP are highlighted in red.

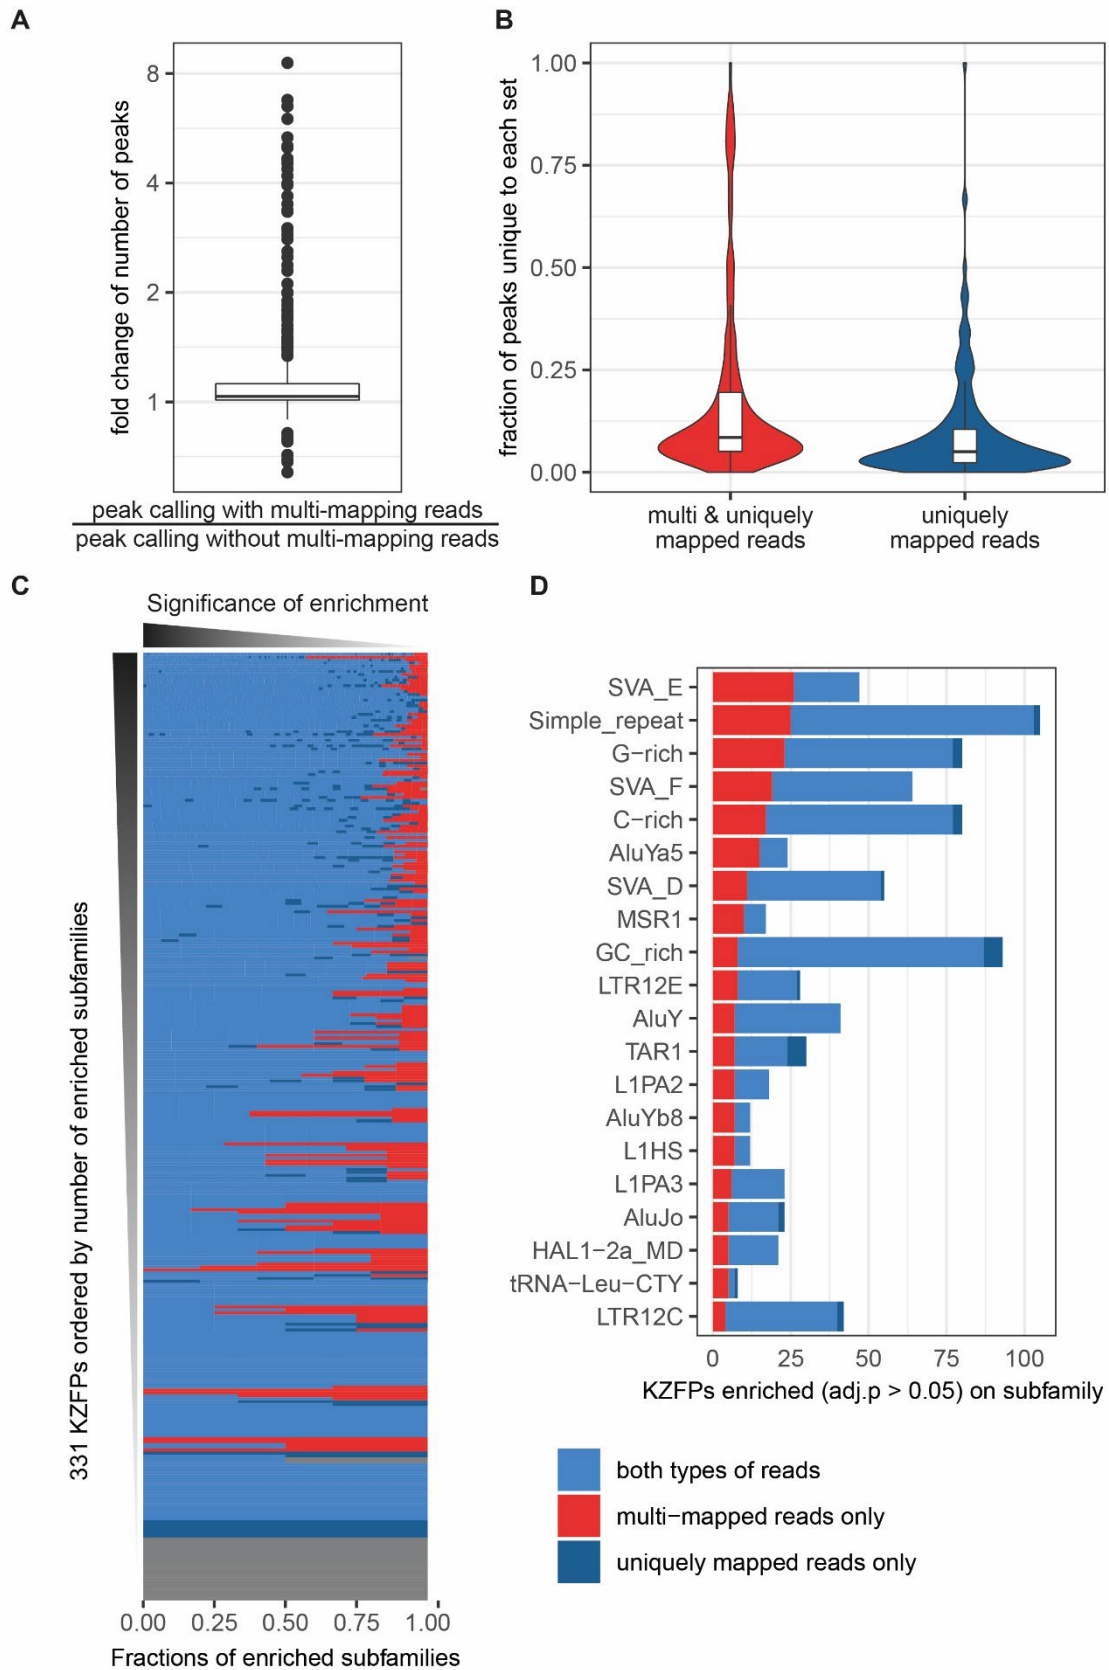



**Figure S9: Impact of multi-mapped reads on peak calling and target enrichment**

A) Boxplot of the  $\log_2$  transformed number of peaks obtained when including multi-mapped reads during peak-calling, divided by the number of peaks when excluding multi-mapped reads for each ChIP-seq experiment. The plot shows a slight increase of the total number of peaks when including multi-mapped reads in the majority of experiments. B) Violine plots showing the fractions of the total number of called peaks uniquely present when including multi-mapped reads (left, red) or when excluding them (right, blue) for all ChIP-seq experiments. This plot indicates the fraction of peaks that would be lost when excluding multi-mapped reads (left, red) or when including them (right, blue), showing that both adding and removing multi-mapped reads lead to a unique set of peaks for most experiments. C) Effect of multi-mapped reads on enrichment over Repeat Subfamilies. Each row in the plot represents the union of all significantly enriched subfamilies for one KZFP, both when including or excluding multi-mapped reads. The colored proportions show the fractions that were found to be enriched only when including multi-mapped reads in the analysis (red), only when excluding multi-mapped reads from the analysis (dark blue) or in both cases (light blue). KZFPs with no enriched subfamilies are shown in grey. KZFPs are ordered by the total number of enriched subfamilies with the highest on the top. Subfamilies for each KZFP are ordered by adjusted p-value, with the lowest p-values on the left. The plot shows that the Repeat subfamilies gained by including multi-mapped reads (red) are generally less significantly enriched than the ones gained by excluding multi-mapped reads (dark blue). D) Bar plot showing the twenty Repeat Subfamilies most positively affected by the inclusion of multi-mapped reads during the analysis. The bar width represents the number of KZFPs enriched on a subfamily. The colors indicated KZFPs enriched only when multi-mapped reads are included (red), only when multi-mapped reads are excluded (dark blue) or in both cases (light blue).

## Supplementary Methods

### Cross-species zinc fingerprint comparison

The cross-species comparisons of zinc fingerprints (ZFP) of KZFPs was built on the method described in (Imbeault et al. 2017). ZFPs were identified as described in the Methods section of this publication in the genomes of 69 different species including human (hg19, panPan2, panTro5, panTro4, gorGor4, ponAbe2, nomLeu3, chlSab2, colAng1, rhiBie1, macFas5, manLeu1, rhiRox1, papAnu2, macNem1, rheMac8, cerAty1, saiBol1, calJac3, aotNan1, otoGar3, proCoq1, micMur3, galVar1, criGriChoV1, cavPor3, dipOrd1, mm10, hetGla2, hetGla1, ochPri3, oryCun2, rn6, speTri2, vicPac1, manPen1, bosTau6, canFam3, turTru2, musFur1, equCab2, pteVam1, myoLuc2, balAcu1, ailMel1, susScr11, oviAri3, sorAra2, cerSim1, dasNov3, loxAfr3, triMan1, echTel2, monDom5, sarHar1, allMis1, anoCar2, aptMan1, melUnd1, galGal5, aquChr2, geoFor1, chrPic1, melGal5, taeGut2, xenLae2, nanPar1, xenTro9 and latCha1). In our analysis ZFPs were expanded to include the 4<sup>th</sup> DNA interacting amino acid (AA), located at position 2 of the alpha helix (Elrod-Erickson et al. 1998), as well as a special character “\_” flanking each quartet of AAs from a individual zinc finger (ZF). The special character “\_” was added to the Blosum80 matrix (Henikoff and Henikoff 1992) complemented with stop codons with a score of +100 against itself and -100 against any other character, in order to force alignments between entire ZFs. Each ZFP was then aligned globally against all other ZFPs with an opening gap penalty of -20, a gap extension penalty of 0 and no penalty for end gaps. To compare ZFP alignments, we developed a score named Complete Alignment of Zinc Finger (CAZF), which incorporates both the total number of matching amino acids as well as the number of perfectly matching ZF (all four AAs) between ZFPs. The rationale for the inclusion of the latter part being that a ZFP with 4 different AAs in a single ZF (usually a single event like a deletion of an entire ZF) is more closely related to a reference ZFP than another ZFP which has 4 different AAs across 4 ZF (presumably 4 independent events). The score is normalized with the alignment of the ZFP with itself meaning that ZFPs with a score of 1 are identical.

$$CAZF \text{ score} = \frac{1}{2} \left( \frac{AL_{score}}{AL_{self}} + \frac{ZF_{perfect}}{ZF_{self}} \right) \cdot \frac{Len_{seq}}{Len_{align}}$$

Where:  $AL_{score}$  is the alignment score using the modified BLOSUM80 matrix between the amino acids of the reference ZF and the target ZF,  $AL_{self}$  is the alignment of the reference ZF against itself (maximum score),  $ZF_{perfect}$  is the number of ZFs that perfectly aligned (all four AAs),  $ZF_{total}$  the total number of ZFs in the reference sequence,  $Len_{seq}$  the length of the reference sequence, and  $Len_{align}$  the length of the alignment.

The last term was introduced to penalize short ZFP aligning to fractions of much longer ZFPs with high scores. Similarly, the KRAB domains are aligned and compared with the alignment against self:

$$KRAB \text{ score} = \frac{AL_{score}}{AL_{self}} \cdot \frac{Len_{seq}}{Len_{align}}$$

Where:  $AL_{score}$  is the alignment score between the amino acids of the reference KRAB domain and the target KRAB domain,  $AL_{self}$  is the alignment of the reference KRAB domain against itself (maximum score),  $Len_{seq}$  the length of the reference sequence, and  $Len_{align}$  the length of the alignment.

## Supplementary Tables (S1-S4: .xlsx files)

**Table S1: Census of human KZFPs**

**Table S2: CHIP-seq data on human KZFPs**

**Table S3: Primary targets of KZFPs**

**Table S4: KZFP and TE age comparison**

## Supplementary References

- Elrod-Erickson M, Benson TE, Pabo CO. 1998. High-resolution structures of variant Zif268-DNA complexes: implications for understanding zinc finger-DNA recognition. *Struct Lond Engl* 1993 **6**: 451–464.
- GTEX Consortium. 2017. Genetic effects on gene expression across human tissues. *Nature* **550**: 204–213.
- Henikoff S, Henikoff JG. 1992. Amino acid substitution matrices from protein blocks. *Proc Natl Acad Sci U S A* **89**: 10915–10919.
- Imbeault M, Helleboid P-Y, Trono D. 2017. KRAB zinc-finger proteins contribute to the evolution of gene regulatory networks. *Nature* **543**: 550–554.
- Schmitges FW, Radovani E, Najafabadi HS, Barazandeh M, Campitelli LF, Yin Y, Jolma A, Zhong G, Guo H, Kanagalingam T, et al. 2016. Multiparameter functional diversity of human C2H2 zinc finger proteins. *Genome Res* **26**: 1742–1752.
- Weirauch MT, Yang A, Albu M, Cote AG, Montenegro-Montero A, Drewe P, Najafabadi HS, Lambert SA, Mann I, Cook K, et al. 2014. Determination and inference of eukaryotic transcription factor sequence specificity. *Cell* **158**: 1431–1443.
